# Supplementary material for: Emergence and Global Spread of a Dominant Multidrug-Resistant Variant in Acinetobacter baumannii
Source: Research Square preprint supplement (doi:10.21203/rs.3.rs-4224555/v1), 2024-04-11
Supplement: Supplementary file 1 [file 38aba1b109bd623445b4887f.docx]

**Table 1. Summarized information for selected IC/CCs**

| International Clone (IC) | IC1(CC1) | IC2(CC2) | ESL | Other ICs | Non-ICs | All |
| --- | --- | --- | --- | --- | --- | --- |
| Number of Isolates | 1094 | 9726 | 10820 | 1492 | 3331 | 15643 |
| Years of isolation |  |  |  |  |  |  |
| Before 2000 | 21 | 16 | 37 | 12 | 57 | 106 |
| 2001-2010 | 265 | 912 | 1177 | 295 | 463 | 1935 |
| 2011-2020 | 462 | 4739 | 5201 | 680 | 1415 | 7296 |
| 2021- | 46 | 1831 | 1877 | 75 | 493 | 2445 |
| ARGs |  |  |  |  |  |  |
| Non OXA-51 family Carbapenemase | 81.9% | 83.6% | 83.4% | 69.5% | 35.8% | 72.0% |
| Minocycline | 18.7% | 72.4% | 67.0% | 23.2% | 8.0% | 50.2% |
| Sulbactam | 17.2% | 93.6% | 85.9% | 20.9% | 5.4% | 62.5% |
| Quinolone | 97.2% | 99.7% | 99.4% | 91.0% | 47.9% | 87.7% |
| Macrolide | 27.2% | 69.0% | 64.8% | 34.3% | 17.6% | 51.8% |
| Sulfonamide | 90.0% | 79.3% | 81.3% | 79.8% | 57.0% | 75.4% |
| Fosfomycin | 92.5% | 98.2% | 97.6% | 97.4% | 81.5% | 94.1% |
| Aminoglycoside | 100.00% | 100.00% | 100% | 100.00% | 93.6% | 98.6% |
| num ARGs | 15.3 | 17.1 | 16.9 | 14.6 | 9.1 | 15.1 |
| num AMR types | 6.5 | 6.5 | 6.5 | 6.1 | 4.4 | 6.1 |
