# Supplementary material for: Emergence and Global Spread of a Dominant Multidrug-Resistant Variant in Acinetobacter baumannii
Source: Research Square preprint supplement (doi:10.21203/rs.3.rs-4224555/v1), 2024-04-11
Supplement: Supplementary file 2 [file 6b67a157790905caa19126e0.xlsx]

## Sheet: Rec&Mut
Supplementary Data 2. Frequencies of recombination and mutation events, related to Figure 2.
Chromosome sites(10Kilo bytes)	Recombiantion events	Mutation events	Recombination region categories	Gubbins	ClonalFrameML
0	181	0	HRB1	346	77
1	68	0	HRB1	12	51
2	159	0	HRB1	58	150
3	79	0	HRB1	60	44
4	128	0	HRB1	122	152
5	78	0	HRB1	4	72
6	132	0	HRB1	259	112
7	66	0	HRB1	94	46
8	59	0	HRB1	52	36
9	37	0	HRB1	25	12
10	55	0	HRB1	57	62
11	34	0	HRB1	7	28
12	25	0	HRB1	0	29
13	89	0	HRB1	108	93
14	45	0	HRB1	3	56
15	46	104	HRB1	52	31
16	38	185	HRB1	13	14
17	38	0	HRB1	13	26
18	38	0	HRB1	49	41
19	33	294	HRB1	39	22
20	19	330	HRB1	6	21
21	32	152	HRB1	26	25
22	35		HRB1	13	32
23	35		HRB1	39	21
24	10	19	HRB1	2	4
25	28	41	HRB1	11	21
26	30	264	HRB1	27	36
27	21	240	HRB1	4	17
28	17	170	HRB1	17	13
29	42	151	HRB1	79	20
30	46	138	HRB1	53	54
31	29	231	HRB1	51	31
32	26	263	HRB1	4	13
33	22	174	HRB1	24	16
34	19	159	HRB1	3	13
35	43	215	HRB1	58	53
36	7	221	HRB1	13	6
37	11	190	HRB1	7	7
38	15	186	HRB1	13	14
39	12	200	HRB1	18	10
40	7	204	HRB1	0	5
41	15	232	HRB1	27	5
42	14	261	HRB1	12	9
43	4	276	HRB1	2	2
44	16	327	HRB1	3	18
45	13	212	HRB1	22	14
46	6	110	HRB1	7	3
47	12	212	HRB1	0	9
48	8	198	HRB1	9	4
49	20	127	HRB1	10	19
50	10	246	HRB1	7	11
51	16	257	HRB1	20	13
52	21	60	HRB1	15	25
53	28	233	HRB1	54	32
54	27	226	HRB1	1	32
55	21	297	HRB1	1	21
56	61	9	HRB1	18	26
57	20	109	HRB1	7	24
58	13	185	HRB1	6	8
59	19	225	HRB1	27	22
60	16	189	HRB1	28	10
61	11	251	HRB1	19	12
62	16	234	HRB1	22	18
63	15	234	HRB1	29	16
64	9	102	HRB1	8	6
65	7	172	HRB1	13	2
66	9	196	HRB1	11	9
67	11	251	HRB1	8	6
68	15	195	HRB1	27	7
69	18	224	HRB1	21	13
70	5	202	HRB1	9	5
71	13	196	MRB1	21	15
72	16	309	MRB1	0	18
73	2	171	MRB1	1	1
74	7	301	MRB1	7	2
75	10	205	MRB1	3	9
76	14	173	MRB1	19	18
77	11	225	MRB1	13	13
78	3	128	MRB1	1	2
79	15	44	MRB1	23	5
80	7	208	MRB1	6	5
81	11	267	MRB1	13	14
82	7	162	MRB1	8	8
83	11	80	MRB1	5	11
84	4	216	MRB1	5	4
85	7	199	MRB1	5	4
86	16	146	MRB1	29	9
87	14	193	MRB1	9	7
88	29	183	MRB1	48	34
89	13	166	MRB1	18	7
90	9	211	MRB1	10	4
91	19	95	MRB1	7	22
92	48	251	MRB1	18	24
93	42	44	MRB1	64	13
94	61	12	MRB1	15	66
95	15	274	MRB1	10	14
96	19	271	MRB1	34	22
97	13	208	MRB1	2	7
98	2	55	MRB1	3	0
99	0	0	MRB1	0	0
100	0	0	MRB1	0	0
101	0	0	MRB1	0	0
102	0	0	MRB1	0	0
103	21	128	MRB1	6	11
104	6	238	MRB1	8	6
105	5	189	MRB1	9	3
106	13	227	MRB1	21	9
107	5	172	MRB1	7	5
108	10	224	MRB1	0	12
109	15	198	MRB1	3	16
110	3	232	MRB1	3	1
111	13	180	MRB1	20	13
112	12	130	MRB1	17	3
113	0	0	HRB2	0	0
114	0	0	HRB2	0	0
115	0	0	HRB2	0	0
116	41	223	HRB2	68	20
117	14	204	HRB2	18	7
118	27	265	HRB2	0	32
119	40	47	HRB2	76	46
120	23	182	HRB2	19	15
121	21	270	LRB	8	20
122	7	145	LRB	12	5
123	7	248	LRB	3	3
124	5	168	LRB	2	6
125	8	259	LRB	4	8
126	4	173	LRB	2	3
127	6	319	LRB	2	6
128	3	183	LRB	5	2
129	7	222	LRB	6	6
130	4	162	LRB	4	4
131	3	190	LRB	0	1
132	7	220	LRB	12	3
133	1	93	LRB	0	0
134	0	0	LRB	0	0
135	0	0	LRB	0	0
136	0	0	LRB	0	0
137	0	0	LRB	0	0
138	0	0	LRB	0	0
139	0	0	LRB	0	0
140	8	181	LRB	13	10
141	4	201	LRB	1	3
142	4	206	LRB	7	4
143	5	253	LRB	1	3
144	3	213	LRB	5	3
145	4	220	LRB	3	4
146	3	204	LRB	3	2
147	2	188	LRB	2	0
148	6	222	LRB	2	4
149	2	170	LRB	0	0
150	1	208	LRB	0	1
151	2	202	LRB	0	1
152	1	75	LRB	0	0
153	4	66	LRB	4	3
154	6	233	LRB	3	4
155	4	191	LRB	7	4
156	7	226	LRB	2	3
157	1	65	LRB	1	0
158	0	0	LRB	0	0
159	0	0	LRB	0	0
160	0	0	LRB	0	0
161	6	77	LRB	7	6
162	3	317	LRB	2	3
163	5	189	LRB	3	2
164	4	174	LRB	0	3
165	5	227	LRB	9	3
166	5	268	LRB	4	6
167	3	193	LRB	3	1
168	7	193	LRB	12	6
169	1	185	LRB	1	0
170	2	224	LRB	3	2
171	6	225	LRB	1	5
172	3	220	LRB	0	3
173	2	252	LRB	3	0
174	3	244	LRB	1	2
175	3	179	LRB	4	1
176	4	220	LRB	4	1
177	6	162	LRB	3	2
178	0	0	LRB	0	0
179	0	0	LRB	0	0
180	0	0	LRB	0	0
181	0	0	LRB	0	0
182	0	0	LRB	0	0
183	0	0	LRB	0	0
184	0	0	LRB	0	0
185	0	0	LRB	0	0
186	0	0	LRB	0	0
187	0	0	LRB	0	0
188	0	0	LRB	0	0
189	0	0	LRB	0	0
190	0	0	LRB	0	0
191	0	0	LRB	0	0
192	0	0	LRB	0	0
193	0	0	LRB	0	0
194	0	0	LRB	0	0
195	2	16	LRB	3	1
196	0	0	LRB	0	0
197	10	85	LRB	0	4
198	1	163	LRB	1	1
199	5	178	LRB	5	2
200	5	172	LRB	6	5
201	5	192	LRB	8	5
202	2	269	LRB	1	1
203	10	266	LRB	4	5
204	4	271	LRB	4	5
205	3	223	LRB	2	2
206	6	193	LRB	3	7
207	7	99	LRB	12	6
208	2	292	LRB	0	0
209	7	288	LRB	8	7
210	0	306	LRB	0	0
211	5	303	LRB	0	3
212	14	298	LRB	17	17
213	12	265	LRB	22	4
214	8	272	LRB	8	5
215	2	191	LRB	1	1
216	4	313	LRB	2	3
217	4	331	LRB	7	4
218	3	285	LRB	2	2
219	2	228	LRB	0	1
220	4	308	LRB	3	2
221	4	210	LRB	7	2
222	8	196	LRB	12	5
223	3	163	LRB	4	3
224	5	162	LRB	1	2
225	9	259	LRB	9	4
226	4	196	LRB	2	1
227	4	224	LRB	5	2
228	6	172	LRB	9	1
229	6	220	LRB	6	2
230	4	111	LRB	1	4
231	6	233	LRB	6	4
232	3	242	LRB	3	1
233	3	222	LRB	1	1
234	9	203	LRB	10	6
235	6	173	LRB	1	2
236	2	146	LRB	0	0
237	4	185	LRB	2	5
238	6	225	LRB	7	5
239	1	262	LRB	1	0
240	4	221	LRB	7	3
241	8	152	LRB	2	10
242	0	0	LRB	0	0
243	0	0	LRB	0	0
244	0	0	LRB	0	0
245	0	0	LRB	0	0
246	0	0	LRB	0	0
247	0	0	LRB	0	0
248	0	0	LRB	0	0
249	0	0	LRB	0	0
250	0	0	LRB	0	0
251	0	0	LRB	0	0
252	0	0	LRB	0	0
253	0	0	LRB	0	0
254	4	7	LRB	7	4
255	7	128	LRB	2	7
256	6	239	LRB	11	3
257	2	56	LRB	2	2
258	0	0	LRB	0	0
259	22	214	LRB	9	25
260	2	211	LRB	2	1
261	2	172	LRB	1	0
262	13	214	LRB	9	8
263	16	207	LRB	26	18
264	6	137	LRB	0	5
265	0	0	LRB	0	0
266	0	0	LRB	0	0
267	0	0	LRB	0	0
268	0	0	LRB	0	0
269	0	0	LRB	0	0
270	4	45	LRB	6	4
271	5	211	LRB	7	1
272	6	213	LRB	2	7
273	8	254	LRB	9	3
274	1	37	LRB	0	0
275	0	0	LRB	0	0
276	0	0	LRB	0	0
277	0	0	LRB	0	0
278	0	0	LRB	0	0
279	0	0	LRB	0	0
280	0	0	LRB	0	0
281	0	0	LRB	0	0
282	0	0	LRB	0	0
283	0	7	LRB	0	0
284	7	157	LRB	8	5
285	6	180	LRB	8	4
286	7	176	LRB	0	6
287	7	154	LRB	6	4
288	5	189	LRB	9	2
289	3	189	LRB	1	1
290	10	213	LRB	18	9
291	18	215	LRB	32	23
292	9	213	LRB	12	9
293	39	164	LRB	14	12
294	45	0	HRB3	89	51
295	115	0	HRB3	218	128
296	145	0	HRB3	221	121
297	34	56	HRB3	33	31
298	13	182	HRB3	5	13
299	6	200	HRB3	1	6
300	5	162	HRB3	4	3
301	8	157	MRB2	6	7
302	24	261	MRB2	8	11
303	3	203	MRB2	3	2
304	6	255	MRB2	10	3
305	3	151	MRB2	4	2
306	9	211	MRB2	2	2
307	8	187	MRB2	3	5
308	5	162	MRB2	3	4
309	9	201	MRB2	12	3
310	5	118	MRB2	7	1
311	3	196	MRB2	0	1
312	4	202	MRB2	4	4
313	2	167	MRB2	2	2
314	4	292	MRB2	1	5
315	0	14	MRB2	0	0
316	0	0	MRB2	0	0
317	7	22	MRB2	5	5
318	1	102	MRB2	1	0
319	5	227	MRB2	4	6
320	6	237	MRB2	11	3
321	4	176	MRB2	6	2
322	6	164	MRB2	10	6
323	11	90	MRB2	3	6
324	3	132	MRB2	0	3
325	10	197	MRB2	4	4
326	2	219	MRB2	2	2
327	1	143	MRB2	0	0
328	6	266	MRB2	2	5
329	1	220	MRB2	1	1
330	4	211	MRB2	5	2
331	3	193	MRB2	2	3
332	8	167	MRB2	11	5
333	5	165	MRB2	3	1
334	3	159	MRB2	0	1
335	0	0	MRB2	0	0
336	10	87	MRB2	7	4
337	2	179	MRB2	2	1
338	5	190	MRB2	5	1
339	7	183	MRB2	6	3
340	3	133	MRB2	3	2
341	7	136	MRB2	3	3
342	9	216	MRB2	9	8
343	6	201	MRB2	2	5
344	5	193	MRB2	6	4
345	9	169	MRB2	5	10
346	2	156	MRB2	0	0
347	2	205	MRB2	2	2
348	6	189	MRB2	0	5
349	5	166	MRB2	5	4
350	4	171	MRB2	2	2
351	6	147	MRB2	3	3
352	1	181	MRB2	1	0
353	1	150	MRB2	1	0
354	8	170	MRB2	6	9
355	7	190	MRB2	4	7
356	2	125	MRB2	1	1
357	4	194	MRB2	0	2
358	2	122	MRB2	3	2
359	8	150	MRB2	8	5
360	12	270	MRB2	10	6
361	20	236	HRB1	15	19
362	11	147	HRB1	9	7
363	5	170	HRB1	7	3
364	17	193	HRB1	25	6
365	14	174	HRB1	0	10
366	11	160	HRB1	18	13
367	2	72	HRB1	2	0
368	0	0	HRB1	0	0
369	0	0	HRB1	0	0
370	0	0	HRB1	0	0
371	58	0	HRB1	0	49
372	93	0	HRB1	176	111
373	77	0	HRB1	59	46
374	84	0	HRB1	43	38
375	164	0	HRB1	277	150
376	89	0	HRB1	7	78
377	212	0	HRB1	285	67
378	98	0	HRB1	146	86
379	55	0	HRB1	85	67
380	0	0	HRB1	0	0
381	0	0	HRB1	0	0
382	260	0	HRB1	311	252
383	171	0	HRB1	145	79
384	61	0	HRB1	60	47
385	353	0	HRB1	409	133
386	343	0	HRB1	287	278
387	83	0	HRB1	112	98
388	0	0	HRB1	0	0
389	637	0	HRB1	397	753
390	257	0	HRB1	153	222
391	167	0	HRB1	88	143
392	98	0	HRB1	5	99
393	162	0	HRB1	34	206
394	104	0	HRB1	168	57
395	108	0	HRB1	126	108
396	13	31	HRB1	14	5
397	0	0	HRB1	0	0
398	0	0	HRB1	0	0
