# Supplementary material for: Emergence and Global Spread of a Dominant Multidrug-Resistant Variant in Acinetobacter baumannii
Source: Research Square preprint supplement (doi:10.21203/rs.3.rs-4224555/v1), 2024-04-11
Supplement: Supplementary file 3 [file 86b396e82fa111aac64eb62d.xlsx]

## Sheet: Sheet1
Supplementary Data 1. Isolates and genomes, related to Figures 1, 2, 3 and 4.
Isolate	Pas_ST	Oxf_ST	International Clones	ESL clade	ESL cluster	Year	Country	Continent	AMR_Type	AMR_Num	KL(confidence)	OC(confidence)	Aminoglycoside	Minocycline	Fosfomycin	Colistin	Sulbactam	Sulfonamide	Macrolide	Trimethoprim	Tigecycline	Quinolone	Quinolone (gyrA_S81L/parC_S84L)
GCF_000248195	69	New Oxford ST				1948	United Kingdom	Europe	3	3	KL224(None)	OCL6(None)	1	0	0	0	0	1	0	0	0	0	0
GCF_000695855	2	195	IC2	2.5	2.5.6	2011	Malaysia	Asia	6	18	KL3(High)	OCL1(Very high)	1	1	1	0	1	0	1	0	0	0	1
GCF_000746605	638	1000				2010	Canada	North America	3	7	KL47(Very high)	OCL7(Very high)	1	0	0	0	0	1	0	0	0	0	0
GCF_000746645	79	758	IC5			2010	Canada	North America	5	18	KL9(Very high)	OCL10(High)	1	0	1	0	1	1	0	0	0	0	1
GCF_000731965	621	1013				Unknown	France	Europe	3	6	KL1(Very high)	OCL1(Very high)	1	0	1	0	0	0	0	0	0	0	0
GCF_000734775	2	381	IC2	2.4	2.4.7	2012	China	Asia	7	19	KL77(Perfect)	OCL1(Very high)	1	0	1	0	1	1	1	0	0	0	1
GCF_001077655	10	447	IC8			2012	Canada	North America	9	26	KL49(Very high)	OCL2(Very high)	1	1	1	0	0	1	1	0	0	0	1
GCF_001077675	437	112				2014	Canada	North America	4	6	KL3(Perfect)	OCL2(Very high)	1	0	1	0	0	1	0	0	0	0	0
GCF_003931755	2	208	IC2	2.4	2.4.2	2016	Canada	North America	7	24	KL2(Very high)	OCL1(Very high)	1	1	0	0	1	1	1	0	0	0	1
GCF_000757665	79	227	IC5			2012	Argentina	South America	8	16	KL22(Good)	OCL10(Good)	1	0	1	0	1	1	0	1	0	0	1
GCF_000759395	271	973				2014	Spain	Europe	3	6	KL19(High)	OCL1(High)	1	0	1	0	0	0	0	0	0	0	0
GCF_000760395	40	373				Unknown	Japan	Asia	2	5	KL47(Very high)	OCL6(Very high)	1	0	0	0	0	0	0	0	0	0	0
GCF_000760415	40	373				Unknown	Japan	Asia	2	5	KL47(Very high)	OCL6(Very high)	1	0	0	0	0	0	0	0	0	0	0
GCF_000760435	52	931				2008	Japan	Asia	4	8	KL3(Very high)	OCL1(Very high)	1	0	1	0	0	0	0	0	0	0	0
GCF_000760455	40	373				2008	Japan	Asia	2	5	KL47(Very high)	OCL6(Very high)	1	0	0	0	0	0	0	0	0	0	0
GCF_000760475	52	931				2008	Japan	Asia	4	8	KL3(Very high)	OCL1(Very high)	1	0	1	0	0	0	0	0	0	0	0
GCF_000761175	79	924	IC5			2014	Spain	Europe	5	16	KL3(Very high)	OCL10(Very high)	1	0	1	0	1	1	0	0	0	0	1
GCF_000761465	2	195	IC2	2.5	2.5.6	2010	Thailand	Asia	7	19	KL3(Very high)	OCL1(Very high)	1	1	1	0	1	1	1	0	0	0	1
GCF_000763365	1	231	IC1	1.4	1.4.6	1997	Argentina	South America	6	15	KL1(Very high)	OCL1(Perfect)	1	1	1	0	1	0	0	0	0	0	1
GCF_000766105	2	938	IC2	2.5	2.5.6	2013	Malaysia	Asia	7	18	KL210(Good)	OCL1(Very high)	1	1	1	0	1	1	1	0	0	0	1
GCF_000775835	52	931				2008	Japan	Asia	4	8	KL3(Very high)	OCL1(Very high)	1	0	1	0	0	0	0	0	0	0	0
GCF_000775855	52	931				2008	Japan	Asia	4	8	KL3(Very high)	OCL1(Very high)	1	0	1	0	0	0	0	0	0	0	0
GCF_000775875	40	373				2008	Japan	Asia	2	5	KL47(Very high)	OCL6(Very high)	1	0	0	0	0	0	0	0	0	0	0
GCF_000787015	119	1638				2013	Malaysia	Asia	5	12	KL32(High)	OCL5(Very high)	1	0	0	0	0	1	1	0	0	0	0
GCF_000787215	2	218	IC2	2.4	2.4.11	2012	China	Asia	8	21	KL7(Good)	OCL1(Very high)	1	1	1	0	1	1	1	0	0	0	1
GCF_000787225	2	191	IC2	2.4	2.4.10	2012	China	Asia	5	13	KL72(Very high)	OCL1(Very high)	1	0	1	0	1	1	0	0	0	0	1
GCF_000787235	2	208	IC2	2.4	2.4.13	2012	China	Asia	6	18	KL2(Very high)	OCL1(Very high)	1	1	1	0	1	1	0	0	0	0	1
GCF_000787275	40	1176				2012	China	Asia	2	5	KL104(Very high)	OCL6(Very high)	1	0	0	0	0	0	0	0	0	0	0
GCF_000787295	2	191	IC2	2.4	2.4.10	2012	China	Asia	7	18	KL72(Very high)	OCL1(Very high)	1	0	1	0	1	1	1	0	0	0	1
GCF_000787315	2	208	IC2	2.4	2.4.13	2012	China	Asia	6	17	KL2(Very high)	OCL1(Very high)	1	1	1	0	1	1	0	0	0	0	1
GCF_000787335	2	208	IC2	2.4	2.4.13	2012	China	Asia	6	17	KL2(Very high)	OCL1(Very high)	1	1	1	0	1	1	0	0	0	0	1
GCF_000787355	2	368	IC2	2.3	2.3.3	2012	China	Asia	7	18	KL34(Perfect)	OCL1(Very high)	1	1	1	0	1	1	1	0	0	0	1
GCF_000794125	1	781	IC1	1.4	1.4.9	2002	Australia	Oceania	7	18	KL15(Perfect)	OCL3(Perfect)	1	1	1	0	1	1	0	0	0	0	1
GCF_000802885	2	195	IC2	2.5	2.5.6	2010	Thailand	Asia	7	19	KL3(Good)	OCL1(Very high)	1	1	1	0	1	1	1	0	0	0	1
GCF_000802895	2	436	IC2	2.5	2.5.6	2010	Thailand	Asia	6	18	KL47(Very high)	OCL1(Very high)	1	1	1	0	1	0	1	0	0	0	1
GCF_000802915	10	585	IC8			2010	Thailand	Asia	4	7	KL108(Very high)	OCL2(Very high)	1	0	1	0	0	0	0	0	0	0	1
GCF_000804635	2	218	IC2	2.4	2.4.11	2011	China	Asia	8	22	KL7(Perfect)	OCL1(Very high)	1	1	1	0	1	1	1	0	0	0	1
GCF_000804645	2	369	IC2	2.4	2.4.0	2011	China	Asia	8	21	KL9(Very high)	OCL1(Very high)	1	1	1	0	1	1	1	0	0	0	1
GCF_000804655	2	1513	IC2	2.3	2.3.3	2004	China	Asia	7	18	KL34(Perfect)	OCL1(Very high)	1	1	1	0	1	1	1	0	0	0	1
GCF_000804665	2	368	IC2	2.3	2.3.3	2011	China	Asia	7	18	KL34(Perfect)	OCL1(Very high)	1	1	1	0	1	1	1	0	0	0	1
GCF_000804715	2	368	IC2	2.3	2.3.3	2004	China	Asia	6	16	KL34(Very high)	OCL1(Very high)	1	1	1	0	1	0	1	0	0	0	1
GCF_000804725	2	457	IC2	2.5	2.5.2	2011	China	Asia	7	19	KL49(Very high)	OCL1(Very high)	1	1	1	0	1	1	1	0	0	0	1
GCF_000804735	2	368	IC2	2.3	2.3.3	2003	China	Asia	7	21	KL34(Perfect)	OCL1(Very high)	1	1	1	0	1	1	1	0	0	0	1
GCF_000804745	2	1513	IC2	2.3	2.3.3	2004	China	Asia	7	21	KL34(Perfect)	OCL1(Very high)	1	1	1	0	1	1	1	0	0	0	1
GCF_000804795	2	208	IC2	2.4	2.4.6	2005	China	Asia	8	21	KL2(Very high)	OCL1(Very high)	1	1	1	0	1	1	1	0	0	0	1
GCF_000804805	2	369	IC2	2.4	2.4.13	2011	China	Asia	8	20	KL9(Very high)	OCL1(Very high)	1	1	1	0	1	1	1	0	0	0	1
GCF_000804815	2	208	IC2	2.4	2.4.13	2011	China	Asia	6	17	KL2(Very high)	OCL1(Very high)	1	1	1	0	1	1	0	0	0	0	1
GCF_000804825	2	208	IC2	2.4	2.4.13	2011	China	Asia	8	21	KL2(High)	OCL1(Very high)	1	1	1	0	1	1	1	0	0	0	1
GCF_000804875	2	369	IC2	2.4	2.4.13	2011	China	Asia	8	21	KL9(Very high)	OCL1(Very high)	1	1	1	0	1	1	1	0	0	0	1
GCF_000804885	2	191	IC2	2.4	2.4.10	2011	China	Asia	5	13	KL72(Very high)	OCL1(Very high)	1	0	1	0	1	1	0	0	0	0	1
GCF_000804895	2	643	IC2	2.4	2.4.2	2011	China	Asia	8	22	KL8(Very high)	OCL1(Very high)	1	1	1	0	1	1	1	0	0	0	1
GCF_000804905	2	208	IC2	2.3	2.3.0	2005	China	Asia	8	20	KL2(Very high)	OCL1(Very high)	1	1	1	0	1	1	1	1	0	0	1
GCF_000804955	23	642	IC8			2004	China	Asia	6	11	KL8(Perfect)	OCL2(Very high)	1	1	1	0	0	1	0	0	0	0	1
GCF_000804965	23	642	IC8			2004	China	Asia	6	11	KL8(Very high)	OCL2(Good)	1	1	1	0	0	1	0	0	0	0	1
GCF_000804975	2	208	IC2	2.4	2.4.13	2011	China	Asia	8	21	KL2(Very high)	OCL1(Very high)	1	1	1	0	1	1	1	0	0	0	1
GCF_000804985	2	208	IC2	2.4	2.4.13	2011	China	Asia	8	22	KL2(Very high)	OCL1(Very high)	1	1	1	0	1	1	1	0	0	0	1
GCF_000805035	2	350	IC2	2.3	2.3.0	1999	China	Asia	7	19	KL9(Very high)	OCL1(Very high)	1	1	1	0	1	1	0	0	0	0	1
GCF_000805045	23	New Oxford ST	IC8			2011	China	Asia	3	5	KL62(Very high)	OCL6(Very high)	1	0	1	0	0	0	0	0	0	0	0
GCF_000805055	2	457	IC2	2.5	2.5.2	2011	China	Asia	6	18	KL49(Very high)	OCL1(Very high)	1	1	1	0	1	0	1	0	0	0	1
GCF_000805065	1554	1988				2011	China	Asia	4	7	KL3(Very high)	OCL2(Very high)	1	0	1	0	0	0	0	0	0	0	0
GCF_000805115	2	381	IC2	2.4	2.4.7	2011	China	Asia	7	17	KL77(Perfect)	OCL1(Very high)	1	0	1	0	1	1	1	0	0	0	1
GCF_000805125	2	208	IC2	2.4	2.4.10	2011	China	Asia	8	23	KL2(Very high)	OCL1(Very high)	1	1	1	0	1	1	1	0	0	0	1
GCF_000805135	105	1176				2011	China	Asia	3	6	KL104(Very high)	OCL5(Very high)	1	0	1	0	0	0	0	0	0	0	0
GCF_000805145	2	New Oxford ST	IC2	2.4	2.4.0	2011	China	Asia	8	22	KL9(Very high)	OCL1(Very high)	1	1	1	0	1	1	1	0	0	0	1
GCF_000805195	2	369	IC2	2.4	2.4.0	2011	China	Asia	7	18	KL9(Very high)	OCL1(Very high)	1	1	1	0	1	1	1	0	0	0	1
GCF_000805205	2	651	IC2	2.4	2.4.2	2011	China	Asia	8	19	KL62(Very high)	OCL1(Very high)	1	1	1	0	1	1	1	0	0	0	1
GCF_000805215	10	447	IC8			2011	China	Asia	4	9	KL49(Perfect)	OCL2(Very high)	1	0	1	0	0	0	0	0	0	0	1
GCF_000805225	2	208	IC2	2.4	2.4.13	2011	China	Asia	6	16	KL2(Very high)	OCL1(Very high)	1	1	1	0	1	1	0	0	0	0	1
GCF_000805275	2	208	IC2	2.4	2.4.13	2011	China	Asia	8	21	KL2(Very high)	OCL1(Very high)	1	1	1	0	1	1	1	0	0	0	1
GCF_000805295	2	368	IC2	2.4	2.4.13	2011	China	Asia	8	21	KL34(Perfect)	OCL1(Very high)	1	1	1	0	1	1	1	0	0	0	1
GCF_000805305	2	208	IC2	2.4	2.4.13	2011	China	Asia	8	21	KL2(Very high)	OCL1(Very high)	1	1	1	0	1	1	1	0	0	0	1
GCF_000805365	1184	New Oxford ST				2014	Malaysia	Asia	2	5	KL229(Good)	OCL3(Good)	0	1	0	0	0	0	0	0	0	0	0
GCF_000805515	215	New Oxford ST	IC2	2.4	2.4.14	2010	Thailand	Asia	7	19	KL52(Very high)	OCL5(Very high)	1	1	1	0	1	1	1	0	0	0	1
GCF_000805525	2	368	IC2	2.3	2.3.2	2010	Thailand	Asia	6	15	KL52(Good)	OCL1(Very high)	1	1	1	0	1	1	0	0	0	0	1
GCF_000805535	653	New Oxford ST				2010	Thailand	Asia	3	5	KL66(Perfect)	OCL14(Very high)	1	0	1	0	0	0	0	0	0	0	0
GCF_000805545	2	208	IC2	2.5	2.5.0	2010	Thailand	Asia	7	19	KL2(Very high)	OCL1(Very high)	1	1	1	0	1	1	1	0	0	0	1
GCF_000805595	2	457	IC2	2.5	2.5.2	2010	Thailand	Asia	7	19	KL49(Very high)	OCL1(Very high)	1	1	1	0	1	1	1	0	0	0	1
GCF_000805615	2	New Oxford ST	IC2	2.3	2.3.2	2010	Thailand	Asia	6	15	KL52(None)	OCL1(Very high)	1	1	1	0	1	1	0	0	0	0	1
GCF_000805635	2	New Oxford ST	IC2	2.3	2.3.2	2010	Thailand	Asia	6	15	KL52(None)	OCL1(Very high)	1	1	1	0	1	1	0	0	0	0	1
GCF_003931775	2	208	IC2	2.4	2.4.2	2016	Canada	North America	7	24	KL2(Very high)	OCL1(Very high)	1	1	0	0	1	1	1	0	0	0	1
GCF_004101685	2	208	IC2	2.4	2.4.2	2013	Canada	North America	8	23	KL9(Very high)	OCL1(High)	1	1	1	0	1	1	1	0	0	0	1
GCF_004101705	2	208	IC2	2.4	2.4.2	2014	Canada	North America	8	22	KL9(Very high)	OCL1(High)	1	1	1	0	1	1	1	0	0	0	1
GCF_004101725	2	208	IC2	2.4	2.4.2	2012	Canada	North America	8	22	KL9(Very high)	OCL1(High)	1	1	1	0	1	1	1	0	0	0	1
GCF_004101745	2	208	IC2	2.4	2.4.2	2012	Canada	North America	8	22	KL9(Very high)	OCL1(High)	1	1	1	0	1	1	1	0	0	0	1
GCF_004152685	241	951				2014	Canada	North America	3	5	KL104(Very high)	OCL5(High)	1	0	1	0	0	0	0	0	0	0	0
GCF_004152715	New Pasteur ST	New Oxford ST				2014	Canada	North America	3	5	KL6(High)	OCL7(Very high)	1	0	1	0	0	0	0	0	0	0	0
GCF_004152785	New Pasteur ST	New Oxford ST				2014	Canada	North America	3	5	KL6(High)	OCL7(Very high)	1	0	1	0	0	0	0	0	0	0	0
GCF_004153295	New Pasteur ST	New Oxford ST				2014	Canada	North America	3	5	KL6(High)	OCL7(Very high)	1	0	1	0	0	0	0	0	0	0	0
GCF_004354125	1039	New Oxford ST				2013	Canada	North America	3	6	KL146(Very high)	OCL1(Very high)	1	0	1	0	0	0	0	0	0	0	0
GCF_004354145	New Pasteur ST	New Oxford ST				2013	Canada	North America	3	5	KL165(Perfect)	OCL1(Very high)	1	0	1	0	0	0	0	0	0	0	0
GCF_004354165	New Pasteur ST	1301				2013	Canada	North America	2	4	KL108(Very high)	OCL2(Very high)	1	0	0	0	0	0	0	0	0	0	0
GCF_004354185	1039	New Oxford ST				2013	Canada	North America	3	6	KL146(High)	OCL1(Very high)	1	0	1	0	0	0	0	0	0	0	0
GCF_008244865	2	208	IC2	2.4	2.4.2	2012	Canada	North America	8	22	KL9(Very high)	OCL1(High)	1	1	1	0	1	1	1	0	0	0	1
GCF_008244885	2	208	IC2	2.4	2.4.2	2013	Canada	North America	8	22	KL9(Very high)	OCL1(High)	1	1	1	0	1	1	1	0	0	0	1
GCF_008244905	2	208	IC2	2.4	2.4.2	2013	Canada	North America	8	22	KL9(Very high)	OCL1(High)	1	1	1	0	1	1	1	0	0	0	1
GCF_009833005	825	New Oxford ST				2015	Canada	North America	4	7	KL140(High)	OCL4(Very high)	1	0	1	0	0	0	0	0	0	0	0
GCF_015571935	New Pasteur ST	New Oxford ST				2018	Canada	North America	3	5	KL209(Perfect)	OCL2(Very high)	1	0	1	0	0	0	0	0	0	0	0
GCF_015676585	New Pasteur ST	New Oxford ST				2018	Canada	North America	3	5	KL209(Good)	OCL2(Very high)	1	0	1	0	0	0	0	0	0	0	0
GCF_015676635	375	New Oxford ST				2018	Canada	North America	3	5	KL47(None)	OCL6(Very high)	1	0	1	0	0	0	0	0	0	0	0
GCF_015676835	New Pasteur ST	New Oxford ST				2018	Canada	North America	3	5	KL209(Good)	OCL2(Very high)	1	0	1	0	0	0	0	0	0	0	0
GCF_015676875	New Pasteur ST	New Oxford ST				2018	Canada	North America	3	5	KL209(Good)	OCL2(Very high)	1	0	1	0	0	0	0	0	0	0	0
GCF_000708775	499	345				2012	United States	North America	5	11	KL18(Very high)	OCL3(Very high)	1	1	1	0	0	0	0	0	0	0	0
GCF_000708795	499	345				2012	United States	North America	5	10	KL18(Very high)	OCL3(Very high)	1	1	1	0	0	0	0	0	0	0	0
GCF_000738845	499	345				2010	United States	North America	6	15	KL19(None)	OCL3(Very high)	1	1	1	0	0	0	1	0	0	0	0
GCF_000808765	2	208	IC2	2.4	2.4.2	2007	United States	North America	8	22	KL2(Good)	OCL1(Good)	1	1	1	0	1	1	1	0	0	0	1
GCF_000808775	2	208	IC2	2.4	2.4.2	2008	United States	North America	7	21	KL2(Very high)	OCL1(Good)	1	1	1	0	1	0	1	0	0	0	1
GCF_000808785	2	208	IC2	2.4	2.4.12	2007	United States	North America	6	16	KL2(Very high)	OCL1(Very high)	1	1	1	0	1	0	1	0	0	0	1
GCF_000808815	2	208	IC2	2.4	2.4.12	2007	United States	North America	7	18	KL2(Good)	OCL1(Very high)	1	1	1	0	1	0	1	0	0	0	1
GCF_000808845	2	208	IC2	2.4	2.4.2	2008	United States	North America	8	23	KL2(Very high)	OCL1(Very high)	1	1	1	0	1	1	1	0	0	0	1
GCF_000808865	2	208	IC2	2.4	2.4.2	2008	United States	North America	8	23	KL2(Very high)	OCL1(Very high)	1	1	1	0	1	1	1	0	0	0	1
GCF_000808885	2	208	IC2	2.4	2.4.12	2008	United States	North America	7	20	KL213(None)	OCL1(Very high)	1	1	1	0	1	0	1	0	0	0	1
GCF_000808905	2	208	IC2	2.4	2.4.2	2008	United States	North America	8	22	KL2(Very high)	OCL1(Very high)	1	1	1	0	1	1	1	0	0	0	1
GCF_000808925	2	208	IC2	2.4	2.4.2	2008	United States	North America	7	20	KL213(None)	OCL1(Good)	1	1	1	0	1	0	1	0	0	0	1
GCF_000808945	2	208	IC2	2.4	2.4.2	2008	United States	North America	8	22	KL2(Good)	OCL1(Very high)	1	1	1	0	1	1	1	0	0	0	1
GCF_000808965	2	208	IC2	2.4	2.4.2	2009	United States	North America	8	23	KL2(Very high)	OCL1(Very high)	1	1	1	0	1	1	1	0	0	0	1
GCF_000808985	2	New Oxford ST	IC2	2.4	2.4.12	2009	United States	North America	6	17	KL170(None)	OCL1(Good)	1	1	1	0	1	0	1	0	0	0	1
GCF_000809005	2	208	IC2	2.4	2.4.2	2009	United States	North America	8	22	KL2(Very high)	OCL1(Very high)	1	1	1	0	1	1	1	0	0	0	1
GCF_000809025	2	208	IC2	2.4	2.4.2	2009	United States	North America	8	21	KL2(Very high)	OCL1(Very high)	1	1	1	0	1	1	1	0	0	0	1
GCF_000809045	2	208	IC2	2.4	2.4.2	2009	United States	North America	8	22	KL2(Very high)	OCL1(Very high)	1	1	1	0	1	1	1	0	0	0	1
GCF_000809065	2	208	IC2	2.3	2.3.2	2009	United States	North America	6	12	KL2(Good)	OCL1(Very high)	1	1	1	0	1	1	0	0	0	0	1
GCF_000809085	2	281	IC2	2.2	2.2.4	2012	United States	North America	4	12	KL22(Good)	OCL3(None)	1	0	0	0	1	1	0	0	0	0	1
GCF_008632635	46	2098				2017	Malaysia	Asia	3	6	KL28(Very high)	OCL1(Very high)	1	0	1	0	0	0	0	0	0	0	0
GCF_000809105	2	417	IC2	2.3	2.3.2	2013	United States	North America	7	23	KL23(None)	OCL1(Very high)	1	1	1	0	1	1	1	0	0	0	1
GCF_000809205	2	208	IC2	2.4	2.4.2	2007	United States	North America	7	21	KL213(None)	OCL1(Very high)	1	1	1	0	1	0	1	0	0	0	1
GCF_000809215	2	208	IC2	2.4	2.4.2	2007	United States	North America	7	21	KL2(Very high)	OCL1(Good)	1	1	1	0	1	0	1	0	0	0	1
GCF_000809225	2	208	IC2	2.4	2.4.2	2007	United States	North America	7	21	KL2(Very high)	OCL1(Very high)	1	1	1	0	1	0	1	0	0	0	1
GCF_000809235	2	350	IC2	2.2	2.2.5	2007	United States	North America	7	18	KL9(Very high)	OCL1(Good)	1	1	1	0	1	1	1	0	0	0	1
GCF_000809285	2	208	IC2	2.4	2.4.12	2008	United States	North America	7	20	KL2(Very high)	OCL1(Very high)	1	1	1	0	1	0	1	0	0	0	1
GCF_000809305	2	208	IC2	2.4	2.4.2	2007	United States	North America	7	21	KL213(None)	OCL1(Very high)	1	1	1	0	1	0	1	0	0	0	1
GCF_000809325	2	208	IC2	2.4	2.4.2	2008	United States	North America	8	23	KL2(Good)	OCL1(Very high)	1	1	1	0	1	1	1	0	0	0	1
GCF_000809345	2	208	IC2	2.4	2.4.12	2007	United States	North America	8	21	KL2(Very high)	OCL1(Very high)	1	1	1	0	1	1	1	0	0	0	1
GCF_000809365	2	208	IC2	2.4	2.4.2	2009	United States	North America	8	21	KL2(Very high)	OCL1(Very high)	1	1	1	0	1	1	1	0	0	0	1
GCF_000809385	2	208	IC2	2.4	2.4.2	2007	United States	North America	8	22	KL2(Very high)	OCL1(Very high)	1	1	1	0	1	1	1	0	0	0	1
GCF_000809405	2	350	IC2	2.2	2.2.5	2007	United States	North America	7	18	KL9(Very high)	OCL1(Good)	1	1	1	0	1	1	1	0	0	0	1
GCF_000809425	2	350	IC2	2.2	2.2.5	2007	United States	North America	7	17	KL9(Very high)	OCL1(Good)	1	1	1	0	1	1	1	0	0	0	1
GCF_000809445	2	208	IC2	2.4	2.4.12	2007	United States	North America	7	17	KL2(Very high)	OCL1(Very high)	1	1	1	0	1	0	1	0	0	0	1
GCF_000809465	2	208	IC2	2.4	2.4.2	2007	United States	North America	8	22	KL2(Very high)	OCL1(Very high)	1	1	1	0	1	1	1	0	0	0	1
GCF_000809485	2	208	IC2	2.4	2.4.2	2009	United States	North America	8	21	KL2(Very high)	OCL1(Very high)	1	1	1	0	1	1	1	0	0	0	1
GCF_000809505	78	944	IC6			2007	United States	North America	4	7	KL155(Low)	OCL1(Very high)	1	0	1	0	0	0	0	0	0	0	1
GCF_000809525	2	208	IC2	2.4	2.4.2	2007	United States	North America	7	21	KL2(Very high)	OCL1(Very high)	1	1	1	0	1	0	1	0	0	0	1
GCF_000809545	2	208	IC2	2.4	2.4.2	2007	United States	North America	7	21	KL2(Good)	OCL1(Very high)	1	1	1	0	1	0	1	0	0	0	1
GCF_000809565	2	208	IC2	2.4	2.4.2	2007	United States	North America	7	21	KL2(Very high)	OCL1(Very high)	1	1	1	0	1	0	1	0	0	0	1
GCF_000809585	2	208	IC2	2.4	2.4.2	2007	United States	North America	7	21	KL2(Very high)	OCL1(Good)	1	1	1	0	1	0	1	0	0	0	1
GCF_000809605	2	208	IC2	2.4	2.4.2	2007	United States	North America	6	16	KL2(Very high)	OCL1(Very high)	1	1	1	0	1	0	0	0	0	0	1
GCF_000809625	2	208	IC2	2.4	2.4.2	2007	United States	North America	7	17	KL2(Good)	OCL1(Very high)	1	1	1	0	1	1	0	0	0	0	1
GCF_000809645	2	208	IC2	2.4	2.4.2	2007	United States	North America	6	16	KL2(Very high)	OCL1(Very high)	1	1	1	0	1	0	0	0	0	0	1
GCF_000809665	2	208	IC2	2.4	2.4.2	2007	United States	North America	7	21	KL2(Good)	OCL1(Good)	1	1	1	0	1	0	1	0	0	0	1
GCF_000809685	2	208	IC2	2.4	2.4.2	2009	United States	North America	8	21	KL2(Very high)	OCL1(Very high)	1	1	1	0	1	1	1	0	0	0	1
GCF_000809705	2	208	IC2	2.4	2.4.2	2009	United States	North America	7	20	KL2(Very high)	OCL1(Very high)	1	1	1	0	1	0	1	0	0	0	1
GCF_000809725	2	208	IC2	2.4	2.4.2	2009	United States	North America	8	21	KL2(Very high)	OCL1(Very high)	1	1	1	0	1	1	1	0	0	0	1
GCF_000809745	2	208	IC2	2.4	2.4.2	2009	United States	North America	7	20	KL2(Very high)	OCL1(Very high)	1	1	1	0	1	0	1	0	0	0	1
GCF_000809765	2	208	IC2	2.4	2.4.2	2009	United States	North America	8	20	KL2(Very high)	OCL1(Very high)	1	1	1	0	1	1	1	0	0	0	1
GCF_000809785	2	208	IC2	2.4	2.4.2	2009	United States	North America	8	21	KL2(Very high)	OCL1(Very high)	1	1	1	0	1	1	1	0	0	0	1
GCF_000809805	2	208	IC2	2.4	2.4.12	2009	United States	North America	8	20	KL2(Good)	OCL1(Very high)	1	1	1	0	1	1	1	0	0	0	1
GCF_000809825	2	208	IC2	2.4	2.4.12	2009	United States	North America	8	20	KL2(Good)	OCL1(Very high)	1	1	1	0	1	1	1	0	0	0	1
GCF_000809845	79	New Oxford ST	IC5			2009	United States	North America	5	16	KL9(Good)	OCL10(Good)	1	0	1	0	1	1	0	0	0	0	1
GCF_000809865	79	New Oxford ST	IC5			2009	United States	North America	4	16	KL9(Good)	OCL10(Good)	1	0	1	0	1	0	0	0	0	0	1
GCF_000809885	2	208	IC2	2.4	2.4.2	2009	United States	North America	8	22	KL2(Very high)	OCL1(Very high)	1	1	1	0	1	1	1	0	0	0	1
GCF_000809905	79	New Oxford ST	IC5			2009	United States	North America	4	16	KL9(Low)	OCL10(Good)	1	0	1	0	1	0	0	0	0	0	1
GCF_000809925	1088	1703				2009	United States	North America	4	7	KL9(Good)	OCL1(Very high)	1	0	1	0	0	0	0	0	0	0	0
GCF_000809945	2	350	IC2	2.2	2.2.5	2009	United States	North America	7	19	KL9(Very high)	OCL1(Good)	1	1	1	0	1	1	1	0	0	0	1
GCF_000809965	1088	1703				2009	United States	North America	5	14	KL9(Good)	OCL1(Good)	1	1	1	0	0	0	0	0	0	0	0
GCF_000809985	2	208	IC2	2.4	2.4.2	2009	United States	North America	7	21	KL2(Good)	OCL1(Good)	1	1	1	0	1	0	1	0	0	0	1
GCF_000810005	1088	1703				2009	United States	North America	4	7	KL9(Good)	OCL1(Very high)	1	0	1	0	0	0	0	0	0	0	0
GCF_000810025	2	New Oxford ST	IC2	2.2	2.2.5	2009	United States	North America	7	20	KL9(Good)	OCL1(Good)	1	1	1	0	1	1	1	0	0	0	1
GCF_000810045	2	350	IC2	2.2	2.2.5	2009	United States	North America	7	18	KL9(Good)	OCL1(Good)	1	1	1	0	1	1	1	0	0	0	1
GCF_000810065	2	350	IC2	2.2	2.2.5	2009	United States	North America	7	18	KL9(Good)	OCL1(Good)	1	1	1	0	1	1	1	0	0	0	1
GCF_000810085	2	350	IC2	2.2	2.2.5	2008	United States	North America	7	18	KL9(Good)	OCL1(Good)	1	1	1	0	1	1	1	0	0	0	1
GCF_000810105	2	New Oxford ST	IC2	2.4	2.4.0	2008	United States	North America	8	22	KL9(Good)	OCL1(Very high)	1	1	1	0	0	1	1	0	0	0	1
GCF_000810125	2	New Oxford ST	IC2	2.4	2.4.12	2008	United States	North America	5	15	KL2(Good)	OCL1(Very high)	1	1	1	0	1	0	0	0	0	0	1
GCF_000810145	2	208	IC2	2.4	2.4.2	2008	United States	North America	8	21	KL2(Very high)	OCL1(Very high)	1	1	1	0	1	1	1	0	0	0	1
GCF_000810165	2	208	IC2	2.4	2.4.2	2008	United States	North America	8	23	KL2(Very high)	OCL1(Very high)	1	1	1	0	1	1	1	0	0	0	1
GCF_000810185	2	208	IC2	2.4	2.4.2	2008	United States	North America	7	20	KL2(Good)	OCL1(Very high)	1	1	1	0	1	0	1	0	0	0	1
GCF_000810205	2	208	IC2	2.4	2.4.12	2008	United States	North America	7	20	KL2(Good)	OCL1(Very high)	1	1	1	0	1	0	1	0	0	0	1
GCF_000810225	2	350	IC2	2.2	2.2.5	2008	United States	North America	7	18	KL9(Good)	OCL1(Good)	1	1	1	0	1	1	1	0	0	0	1
GCF_000810245	2	208	IC2	2.4	2.4.2	2009	United States	North America	7	21	KL2(Very high)	OCL1(Very high)	1	1	1	0	1	0	1	0	0	0	1
GCF_000810265	2	208	IC2	2.4	2.4.2	2009	United States	North America	7	21	KL2(Very high)	OCL1(Very high)	1	1	1	0	1	0	1	0	0	0	1
GCF_000810285	2	208	IC2	2.4	2.4.2	2009	United States	North America	7	20	KL2(Good)	OCL1(Very high)	1	1	1	0	1	0	1	0	0	0	1
GCF_000810305	2	350	IC2	2.2	2.2.5	2009	United States	North America	7	16	KL9(Good)	OCL1(Good)	1	1	1	0	1	1	1	0	0	0	1
GCF_000810325	2	350	IC2	2.2	2.2.5	2009	United States	North America	7	16	KL9(Good)	OCL1(Good)	1	1	1	0	1	1	1	0	0	0	1
GCF_000810345	2	350	IC2	2.2	2.2.5	2009	United States	North America	7	16	KL9(Good)	OCL1(Good)	1	1	1	0	1	1	1	0	0	0	1
GCF_000810365	2	208	IC2	2.3	2.3.2	2009	United States	North America	6	12	KL2(Very high)	OCL1(Very high)	1	1	1	0	1	1	0	0	0	0	1
GCF_000810385	2	208	IC2	2.4	2.4.2	2009	United States	North America	7	20	KL2(Very high)	OCL1(Good)	1	1	1	0	1	0	1	0	0	0	1
GCF_000810405	2	208	IC2	2.4	2.4.2	2009	United States	North America	8	22	KL2(Very high)	OCL1(Very high)	1	1	1	0	1	1	1	0	0	0	1
GCF_000810425	2	208	IC2	2.3	2.3.2	2009	United States	North America	5	15	KL2(Good)	OCL1(Very high)	1	1	1	0	1	0	0	0	0	0	1
GCF_000810445	2	208	IC2	2.4	2.4.2	2009	United States	North America	8	21	KL2(Very high)	OCL1(Very high)	1	1	1	0	1	1	1	0	0	0	1
GCF_000810465	2	208	IC2	2.4	2.4.12	2007	United States	North America	8	19	KL2(Very high)	OCL1(Very high)	1	1	1	0	1	1	1	0	0	0	1
GCF_000810485	2	208	IC2	2.4	2.4.12	2008	United States	North America	7	20	KL2(Good)	OCL1(Very high)	1	1	1	0	1	0	1	0	0	0	1
GCF_000810505	2	208	IC2	2.4	2.4.2	2007	United States	North America	7	21	KL2(Very high)	OCL1(Very high)	1	1	1	0	1	0	1	0	0	0	1
GCF_000810525	2	208	IC2	2.4	2.4.2	2007	United States	North America	7	21	KL2(Very high)	OCL1(Very high)	1	1	1	0	1	0	1	0	0	0	1
GCF_000810545	2	208	IC2	2.4	2.4.2	2007	United States	North America	7	21	KL2(Very high)	OCL1(Very high)	1	1	1	0	1	0	1	0	0	0	1
GCF_000810565	2	208	IC2	2.4	2.4.2	2007	United States	North America	8	22	KL2(Very high)	OCL1(Very high)	1	1	1	0	1	1	1	0	0	0	1
GCF_000810585	2	208	IC2	2.3	2.3.2	2008	United States	North America	5	14	KL2(Very high)	OCL1(Very high)	1	1	1	0	1	0	0	0	0	0	1
GCF_000810605	2	350	IC2	2.2	2.2.5	2007	United States	North America	7	17	KL9(Very high)	OCL1(Good)	1	1	1	0	1	1	1	0	0	0	1
GCF_000810625	2	208	IC2	2.3	2.3.2	2008	United States	North America	5	17	KL2(Good)	OCL1(Very high)	1	1	1	0	1	0	0	0	0	0	1
GCF_000810645	2	208	IC2	2.4	2.4.2	2008	United States	North America	7	20	KL213(None)	OCL1(Good)	1	1	1	0	1	0	1	0	0	0	1
GCF_000810665	2	208	IC2	2.4	2.4.2	2008	United States	North America	7	21	KL2(Good)	OCL1(Very high)	1	1	1	0	1	0	1	0	0	0	1
GCF_000810685	2	208	IC2	2.3	2.3.2	2008	United States	North America	6	18	KL2(Very high)	OCL1(Very high)	1	1	1	0	1	1	0	0	0	0	1
GCF_000810705	2	208	IC2	2.4	2.4.12	2008	United States	North America	8	23	KL2(Very high)	OCL1(Very high)	1	1	1	0	1	1	1	0	0	0	1
GCF_000810725	2	208	IC2	2.4	2.4.2	2008	United States	North America	8	22	KL2(Very high)	OCL1(Very high)	1	1	1	0	1	1	1	0	0	0	1
GCF_000810745	2	208	IC2	2.4	2.4.2	2008	United States	North America	8	23	KL2(Very high)	OCL1(Good)	1	1	1	0	1	1	1	0	0	0	1
GCF_000810755	2	208	IC2	2.4	2.4.12	2008	United States	North America	8	21	KL2(Very high)	OCL1(Very high)	1	1	1	0	1	1	1	0	0	0	1
GCF_000810765	2	208	IC2	2.3	2.3.2	2008	United States	North America	6	19	KL2(Very high)	OCL1(Very high)	1	1	1	0	1	1	0	0	0	0	1
GCF_000810775	2	208	IC2	2.4	2.4.12	2008	United States	North America	8	23	KL2(Very high)	OCL1(Very high)	1	1	1	0	1	1	1	0	0	0	1
GCF_000810825	2	208	IC2	2.4	2.4.12	2008	United States	North America	7	20	KL2(Very high)	OCL1(Very high)	1	1	1	0	1	0	1	0	0	0	1
GCF_000810835	2	208	IC2	2.4	2.4.2	2008	United States	North America	8	22	KL2(Very high)	OCL1(Good)	1	1	1	0	1	1	1	0	0	0	1
GCF_000810865	2	208	IC2	2.4	2.4.2	2008	United States	North America	8	22	KL2(Very high)	OCL1(Very high)	1	1	1	0	1	1	1	0	0	0	1
GCF_000810875	2	208	IC2	2.4	2.4.2	2008	United States	North America	8	22	KL2(Very high)	OCL1(Very high)	1	1	1	0	1	1	1	0	0	0	1
GCF_000810905	2	208	IC2	2.4	2.4.12	2008	United States	North America	7	20	KL2(Very high)	OCL1(Very high)	1	1	1	0	1	0	1	0	0	0	1
GCF_000810915	2	208	IC2	2.4	2.4.12	2012	United States	North America	7	19	KL2(Very high)	OCL1(Very high)	1	1	1	0	1	0	1	0	0	0	1
GCF_000810935	2	350	IC2	2.2	2.2.5	2012	United States	North America	7	18	KL9(Good)	OCL1(Good)	1	1	1	0	1	1	1	0	0	0	1
GCF_000810945	2	208	IC2	2.4	2.4.12	2012	United States	North America	7	19	KL2(Good)	OCL1(Very high)	1	1	1	0	1	0	1	0	0	0	1
GCF_000810985	2	417	IC2	2.3	2.3.2	2013	United States	North America	6	16	KL23(Very high)	OCL1(High)	1	1	1	0	1	0	1	0	0	0	1
GCF_000810995	250	1739				2013	United States	North America	5	11	KL155(Very high)	OCL1(Very high)	1	0	0	0	0	1	1	0	0	0	0
GCF_000811005	2	350	IC2	2.2	2.2.5	2013	United States	North America	7	18	KL9(Good)	OCL1(Good)	1	1	1	0	1	1	1	0	0	0	1
GCF_000811015	2	281	IC2	2.2	2.2.4	2013	United States	North America	5	13	KL22(Very high)	OCL3(Good)	1	0	1	0	1	1	0	0	0	0	1
GCF_000811065	2	417	IC2	2.3	2.3.2	2013	United States	North America	7	18	KL23(Very high)	OCL1(Very high)	1	1	1	0	1	1	1	0	0	0	1
GCF_000811085	2	281	IC2	2.2	2.2.4	2013	United States	North America	3	11	KL22(Very high)	OCL3(Low)	1	0	0	0	1	0	0	0	0	0	1
GCF_000811105	2	208	IC2	2.4	2.4.2	2007	United States	North America	7	21	KL2(Very high)	OCL1(Good)	1	1	1	0	1	0	1	0	0	0	1
GCF_000811125	2	New Oxford ST	IC2	2.4	2.4.0	2007	United States	North America	8	22	KL2(None)	OCL1(Very high)	1	1	1	0	1	1	1	0	0	0	1
GCF_000811145	2	208	IC2	2.4	2.4.2	2008	United States	North America	7	20	KL2(Good)	OCL1(Very high)	1	1	1	0	1	0	1	0	0	0	1
GCF_000811165	2	208	IC2	2.4	2.4.12	2008	United States	North America	8	21	KL2(Very high)	OCL1(High)	1	1	1	0	1	1	1	0	0	0	1
GCF_000811185	2	208	IC2	2.4	2.4.2	2007	United States	North America	8	22	KL2(Very high)	OCL1(Good)	1	1	1	0	1	1	1	0	0	0	1
GCF_000811205	2	208	IC2	2.3	2.3.2	2007	United States	North America	5	15	KL2(Very high)	OCL1(Very high)	1	1	1	0	1	0	0	0	0	0	1
GCF_000811225	2	208	IC2	2.4	2.4.2	2007	United States	North America	5	15	KL2(Very high)	OCL1(Very high)	1	1	1	0	1	0	0	0	0	0	1
GCF_000811245	2	208	IC2	2.4	2.4.2	2007	United States	North America	7	21	KL2(Very high)	OCL1(Good)	1	1	1	0	1	0	1	0	0	0	1
GCF_000811265	2	350	IC2	2.2	2.2.5	2008	United States	North America	7	18	KL9(Good)	OCL1(Good)	1	1	1	0	1	1	1	0	0	0	1
GCF_000811285	2	208	IC2	2.4	2.4.12	2007	United States	North America	5	11	KL2(Good)	OCL1(Very high)	1	1	1	0	1	0	0	0	0	0	1
GCF_000811305	2	208	IC2	2.3	2.3.2	2007	United States	North America	6	17	KL2(Very high)	OCL1(Very high)	1	1	1	0	1	1	0	0	0	0	1
GCF_000811325	2	208	IC2	2.4	2.4.12	2007	United States	North America	5	11	KL2(Very high)	OCL1(Very high)	1	1	1	0	1	0	0	0	0	0	1
GCF_000811345	2	208	IC2	2.3	2.3.2	2007	United States	North America	5	15	KL2(Good)	OCL1(Very high)	1	1	1	0	1	0	0	0	0	0	1
GCF_000811365	2	208	IC2	2.3	2.3.2	2008	United States	North America	6	17	KL2(Very high)	OCL1(Very high)	1	1	1	0	1	1	0	0	0	0	1
GCF_000811385	2	350	IC2	2.2	2.2.5	2008	United States	North America	7	18	KL9(Very high)	OCL1(Good)	1	1	1	0	1	1	1	0	0	0	1
GCF_000811405	2	208	IC2	2.4	2.4.12	2008	United States	North America	7	20	KL213(None)	OCL1(Good)	1	1	1	0	1	0	1	0	0	0	1
GCF_000811425	406	310				2008	United States	North America	4	10	KL1(Good)	OCL1(Very high)	1	0	1	0	1	0	0	0	0	0	0
GCF_000811445	406	New Oxford ST				2008	United States	North America	4	11	KL1(Good)	OCL1(Very high)	1	0	1	0	1	0	0	0	0	0	0
GCF_000814345	464	1161	IC9			2012	Colombia	South America	4	8	KL31(Very high)	OCL6(Very high)	1	0	1	0	0	0	0	0	0	0	0
GCF_000828935	622	919				2013	Nepal	Asia	9	21	KL22(Very high)	OCL5(Perfect)	1	0	1	0	0	1	1	0	0	0	0
GCF_000830055	1	231	IC1	1.4	1.4.0	1982	United Kingdom	Europe	6	12	KL1(Very high)	OCL1(Perfect)	1	1	1	0	0	1	0	0	0	0	0
GCF_000835995	New Pasteur ST	373				2008	Japan	Asia	2	5	KL47(Very high)	OCL6(Very high)	1	0	0	0	0	0	0	0	0	0	0
GCF_000836075	52	931				2008	Japan	Asia	4	8	KL3(Very high)	OCL1(Very high)	1	0	1	0	0	0	0	0	0	0	0
GCF_000836625	1	231	IC1	1.4	1.4.6	1994	Argentina	South America	7	15	KL1(Very high)	OCL1(Perfect)	1	1	1	0	1	1	0	0	0	0	1
GCF_000876055	40	373				2008	Japan	Asia	2	5	KL47(Very high)	OCL6(Very high)	1	0	0	0	0	0	0	0	0	0	0
GCF_000876075	34	432				2008	Japan	Asia	5	11	KL43(Very high)	OCL6(Very high)	1	0	1	0	0	1	1	0	0	0	0
GCF_000876095	52	931				2008	Japan	Asia	4	8	KL3(Very high)	OCL1(Very high)	1	0	1	0	0	0	0	0	0	0	0
GCF_000931755	52	931				Unknown	Japan	Asia	4	6	KL3(Good)	OCL1(Very high)	1	0	1	0	0	1	0	0	0	0	0
GCF_000811465	406	310				2008	United States	North America	5	11	KL1(Very high)	OCL1(Very high)	1	0	1	0	1	1	0	0	0	0	0
GCF_000811485	2	208	IC2	2.4	2.4.2	2007	United States	North America	8	22	KL213(None)	OCL11(Good)	1	1	1	0	1	1	1	0	0	0	1
GCF_000811505	2	208	IC2	2.4	2.4.2	2007	United States	North America	7	21	KL2(Very high)	OCL1(Very high)	1	1	1	0	1	0	1	0	0	0	1
GCF_000811525	2	350	IC2	2.2	2.2.5	2010	United States	North America	7	18	KL9(Very high)	OCL1(Good)	1	1	1	0	1	1	1	0	0	0	1
GCF_000811545	2	350	IC2	2.2	2.2.5	2010	United States	North America	7	18	KL9(Good)	OCL1(Good)	1	1	1	0	1	1	1	0	0	0	1
GCF_000811565	2	208	IC2	2.4	2.4.2	2010	United States	North America	8	23	KL2(Good)	OCL1(Very high)	1	1	1	0	1	1	1	0	0	0	1
GCF_000811585	2	350	IC2	2.2	2.2.5	2010	United States	North America	7	17	KL9(Very high)	OCL1(Good)	1	1	1	0	1	1	1	0	0	0	1
GCF_000811605	2	New Oxford ST	IC2	2.4	2.4.0	2010	United States	North America	6	19	KL213(None)	OCL1(Good)	1	1	1	0	0	0	1	0	0	0	1
GCF_000811625	2	350	IC2	2.2	2.2.5	2010	United States	North America	7	18	KL9(Good)	OCL1(Good)	1	1	1	0	1	1	1	0	0	0	1
GCF_000811645	2	436	IC2	2.4	2.4.2	2010	United States	North America	8	21	KL2(None)	OCL1(Very high)	1	1	1	0	1	1	1	0	0	0	1
GCF_000811665	2	350	IC2	2.2	2.2.5	2010	United States	North America	7	18	KL9(Good)	OCL1(Good)	1	1	1	0	1	1	1	0	0	0	1
GCF_000811685	2	350	IC2	2.2	2.2.5	2010	United States	North America	7	18	KL9(Very high)	OCL1(Good)	1	1	1	0	1	1	1	0	0	0	1
GCF_000811705	2	350	IC2	2.2	2.2.5	2010	United States	North America	7	18	KL9(Very high)	OCL1(Good)	1	1	1	0	1	1	1	0	0	0	1
GCF_000811725	2	350	IC2	2.2	2.2.5	2010	United States	North America	7	17	KL9(Very high)	OCL1(Good)	1	1	1	0	0	1	1	0	0	0	1
GCF_000811745	2	208	IC2	2.4	2.4.2	2010	United States	North America	8	22	KL2(Very high)	OCL1(Very high)	1	1	1	0	1	1	1	0	0	0	1
GCF_000811765	2	208	IC2	2.4	2.4.2	2010	United States	North America	8	22	KL2(Very high)	OCL1(Very high)	1	1	1	0	1	1	1	0	0	0	1
GCF_000811785	2	350	IC2	2.2	2.2.5	2010	United States	North America	7	18	KL9(Good)	OCL1(Good)	1	1	1	0	1	1	1	0	0	0	1
GCF_000811805	10	447	IC8			2011	United States	North America	4	10	KL49(Very high)	OCL2(Very high)	1	0	1	0	0	0	0	0	0	0	1
GCF_000811825	2	350	IC2	2.2	2.2.5	2011	United States	North America	7	18	KL9(Very high)	OCL1(Good)	1	1	1	0	1	1	1	0	0	0	1
GCF_000811845	2	350	IC2	2.2	2.2.5	2011	United States	North America	7	18	KL9(Good)	OCL1(Good)	1	1	1	0	1	1	1	0	0	0	1
GCF_000811865	2	208	IC2	2.4	2.4.2	2011	United States	North America	8	22	KL2(Very high)	OCL1(Very high)	1	1	1	0	1	1	1	0	0	0	1
GCF_000811885	1088	1703				2011	United States	North America	5	11	KL9(Good)	OCL1(Very high)	1	0	1	0	0	1	0	0	0	0	0
GCF_000951165	New Pasteur ST	New Oxford ST	IC2	2.4	2.4.10	2010	China	Asia	6	14	KL72(Very high)	OCL1(Very high)	1	0	1	0	1	0	1	0	0	0	1
GCF_000811905	2	208	IC2	2.4	2.4.12	2011	United States	North America	8	20	KL2(Very high)	OCL1(Very high)	1	1	1	0	1	1	1	0	0	0	1
GCF_000966305	New Pasteur ST	235				2007	Chile	South America	5	12	KL19(Very high)	OCL1(Very high)	1	0	1	0	0	0	1	0	0	0	0
GCF_000966495	2	208	IC2	2.3	2.3.2	2010	Japan	Asia	6	13	KL2(Good)	OCL1(Very high)	1	1	1	0	1	1	0	0	0	0	1
GCF_000966505	16	355				2009	Malaysia	Asia	7	18	KL24(Very high)	OCL7(Very high)	1	1	1	0	0	1	1	0	0	0	0
GCF_000966515	2	473	IC2	2.4	2.4.14	2010	Japan	Asia	8	20	KL22(Good)	OCL1(Very high)	1	1	1	0	1	1	1	0	0	0	1
GCF_000966525	2	208	IC2	2.3	2.3.2	2010	Japan	Asia	6	12	KL2(Very high)	OCL1(Very high)	1	1	1	0	1	1	0	0	0	0	1
GCF_000969285	2	195	IC2	2.5	2.5.6	2009	Malaysia	Asia	7	19	KL3(Good)	OCL1(Very high)	1	1	1	0	1	1	1	0	0	0	1
GCF_000969295	New Pasteur ST	New Oxford ST	IC2	2.4	2.4.16	2010	Singapore	Asia	8	23	KL52(Very high)	OCL1(Very high)	1	1	1	0	1	1	1	0	0	0	1
GCF_000969365	2	218	IC2	2.4	2.4.16	2010	Singapore	Asia	8	21	KL7(Very high)	OCL1(Very high)	1	1	1	0	1	1	1	0	0	0	1
GCF_000969385	1	491	IC1	1.4	1.4.9	2010	Singapore	Asia	5	14	KL107(Perfect)	OCL3(Perfect)	1	0	1	0	0	1	0	0	0	0	1
GCF_000969465	New Pasteur ST	218	IC2	2.4	2.4.16	2010	Singapore	Asia	8	20	KL7(Very high)	OCL1(Very high)	1	1	1	0	1	1	1	0	0	0	1
GCF_000969485	654	New Oxford ST				2010	Singapore	Asia	6	14	KL116(Very high)	OCL6(Very high)	1	0	1	0	0	1	1	0	0	0	0
GCF_000811925	2	208	IC2	2.4	2.4.2	2012	United States	North America	8	22	KL2(Very high)	OCL1(Very high)	1	1	1	0	1	1	1	0	0	0	1
GCF_000811945	2	208	IC2	2.4	2.4.12	2007	United States	North America	8	19	KL2(Very high)	OCL1(Very high)	1	1	1	0	1	1	1	0	0	0	1
GCF_000981405	2	437	IC2	2.2	2.2.6	Unknown	United Kingdom	Europe	5	12	KL2(Good)	OCL1(Very high)	1	1	1	0	1	0	0	0	0	0	1
GCF_000988155	15	236	IC4			2009	Brazil	South America	5	12	KL2(Very high)	OCL7(Very high)	1	0	1	0	1	1	0	0	0	0	1
GCF_001007685	402	229	IC7			2002	Netherlands	Europe	3	5	KL95(Perfect)	OCL7(Very high)	1	0	1	0	0	0	0	0	0	0	0
GCF_001007705	25	229	IC7			1985	Netherlands	Europe	3	6	KL14(Very high)	OCL6(Very high)	1	0	1	0	0	0	0	0	0	0	0
GCF_001007725	25	229	IC7			2008	United Arab Emirates	Asia	6	15	KL14(Perfect)	OCL6(Very high)	1	1	1	0	0	1	0	0	0	0	1
GCF_001007745	25	1641	IC7			2000	Netherlands	Europe	4	11	KL37(Very high)	OCL7(Very high)	1	0	1	0	0	0	0	0	0	0	1
GCF_001007765	25	1641	IC7			2003	Greece	Europe	4	8	KL37(Good)	OCL7(Good)	1	0	1	0	0	0	0	0	0	0	1
GCF_001007775	25	1489	IC7			2011	Argentina	South America	6	15	KL9(Very high)	OCL10(High)	1	1	1	0	0	1	0	0	0	0	1
GCF_001007815	25	440	IC7			2007	Germany	Europe	6	16	KL130(Perfect)	OCL5(Good)	1	0	1	0	0	1	0	0	0	0	1
GCF_001008125	2	195	IC2	2.5	2.5.6	2013	Malaysia	Asia	6	18	KL3(Very high)	OCL1(Very high)	1	1	1	0	1	0	1	0	0	0	1
GCF_001026965	2	208	IC2	2.4	2.4.2	2014	China	Asia	8	23	KL2(Very high)	OCL1(Very high)	1	1	1	0	1	1	1	0	0	0	1
GCF_000939395	2	208	IC2	2.4	2.4.2	2012	United States	North America	8	21	KL2(Very high)	OCL1(Very high)	1	1	1	0	1	1	1	0	0	0	1
GCF_000939405	2	208	IC2	2.4	2.4.2	2012	United States	North America	8	22	KL2(Very high)	OCL1(Very high)	1	1	1	0	1	1	1	0	0	0	1
GCF_000939415	2	208	IC2	2.4	2.4.2	2012	United States	North America	8	23	KL2(High)	OCL1(Very high)	1	1	1	0	1	1	1	0	0	0	1
GCF_000939425	2	208	IC2	2.4	2.4.2	2013	United States	North America	8	22	KL2(Very high)	OCL1(Very high)	1	1	1	0	1	1	1	0	0	0	1
GCF_000939475	2	208	IC2	2.4	2.4.2	2013	United States	North America	8	22	KL2(Very high)	OCL1(Very high)	1	1	1	0	1	1	1	0	0	0	1
GCF_000939485	2	281	IC2	2.2	2.2.4	2013	United States	North America	5	13	KL22(Very high)	OCL3(Good)	1	0	1	0	1	1	0	0	0	0	1
GCF_000939495	2	208	IC2	2.4	2.4.2	2013	United States	North America	8	22	KL2(Very high)	OCL1(Very high)	1	1	1	0	1	1	1	0	0	0	1
GCF_000939535	2	208	IC2	2.4	2.4.2	2013	United States	North America	8	21	KL2(Very high)	OCL1(Very high)	1	1	1	0	1	1	1	0	0	0	1
GCF_001077555	1545	2203				2014	India	Asia	3	5	KL84(High)	OCL6(Very high)	1	0	1	0	0	0	0	0	0	0	0
GCF_001077565	149	New Oxford ST				2014	India	Asia	9	24	KL93(High)	OCL1(Very high)	1	0	1	0	0	1	1	0	0	0	0
GCF_001077575	New Pasteur ST	New Oxford ST				2014	India	Asia	10	26	KL9(Very high)	OCL1(Very high)	1	1	1	0	0	1	1	0	0	0	0
GCF_000939555	2	208	IC2	2.4	2.4.2	2013	United States	North America	8	22	KL2(Very high)	OCL1(Very high)	1	1	1	0	1	1	1	0	0	0	1
GCF_000939565	2	208	IC2	2.4	2.4.2	2013	United States	North America	6	15	KL2(Very high)	OCL1(Very high)	1	1	1	0	1	1	0	0	0	0	1
GCF_001077965	1549	2202				2015	India	Asia	3	5	KL92(Perfect)	OCL6(Very high)	1	0	1	0	0	0	0	0	0	0	0
GCF_001261895	267	942				2013	France	Europe	4	7	KL9(Very high)	OCL2(Very high)	1	0	1	0	0	0	0	0	0	0	0
GCF_001276055	2	451	IC2	2.5	2.5.6	2014	India	Asia	7	18	KL6(Very high)	OCL1(Very high)	1	1	1	0	1	1	1	0	0	0	1
GCF_001276085	10	447	IC8			2013	India	Asia	9	21	KL49(None)	OCL2(Very high)	1	1	1	0	0	1	1	0	0	0	1
GCF_001292715	2	208	IC2	2.4	2.4.13	2012	China	Asia	8	22	KL2(Very high)	OCL1(Very high)	1	1	1	0	1	1	1	0	0	0	1
GCF_001373535	1	441	IC1	1.4	1.4.9	2005	India	Asia	10	25	KL4(Perfect)	OCL1(Perfect)	1	1	1	0	1	1	1	1	0	0	1
GCF_001373575	1	441	IC1	1.4	1.4.9	2005	India	Asia	8	20	KL4(Perfect)	OCL1(Perfect)	1	1	1	0	1	1	0	0	0	0	1
GCF_001399655	81	498	IC1	1.2	1.2.2	2008	Australia	Oceania	5	12	KL12(Perfect)	OCL2(Perfect)	1	0	1	0	0	1	0	0	0	0	1
GCF_001400975	492	New Oxford ST	IC2	2.3	2.3.2	2015	France	Europe	8	20	KL104(Perfect)	OCL1(Very high)	1	1	1	0	1	1	1	1	0	0	1
GCF_000939575	2	208	IC2	2.4	2.4.2	2013	United States	North America	8	20	KL2(Very high)	OCL1(Very high)	1	1	1	0	1	1	1	0	0	0	1
GCF_000939615	2	208	IC2	2.4	2.4.2	2013	United States	North America	8	20	KL2(Very high)	OCL1(Very high)	1	1	1	0	1	1	1	0	0	0	1
GCF_000939635	2	208	IC2	2.4	2.4.2	2013	United States	North America	8	21	KL2(Very high)	OCL1(Very high)	1	1	1	0	1	1	1	0	0	0	1
GCF_000949035	2	208	IC2	2.4	2.4.12	2008	United States	North America	8	21	KL2(Very high)	OCL1(Very high)	1	1	1	0	1	1	1	0	0	0	1
GCF_000949045	2	350	IC2	2.2	2.2.5	2010	United States	North America	7	18	KL9(Very high)	OCL1(Good)	1	1	1	0	1	1	1	0	0	0	1
GCF_000949055	2	208	IC2	2.4	2.4.12	2008	United States	North America	8	21	KL2(Very high)	OCL1(Very high)	1	1	1	0	1	1	1	0	0	0	1
GCF_000949065	2	350	IC2	2.2	2.2.5	2012	United States	North America	7	16	KL9(Very high)	OCL1(Good)	1	1	1	0	1	1	1	0	0	0	1
GCF_000949115	2	350	IC2	2.2	2.2.5	2013	United States	North America	7	18	KL9(Very high)	OCL1(Good)	1	1	1	0	1	1	1	0	0	0	1
GCF_000949165	250	1739				2012	United States	North America	5	11	KL155(Good)	OCL1(Very high)	1	0	0	0	0	1	1	0	0	0	0
GCF_000949175	2	New Oxford ST	IC2	2.4	2.4.2	2009	United States	North America	8	23	KL2(Very high)	OCL1(Good)	1	1	1	0	1	1	1	0	0	0	1
GCF_000949185	250	1739				2012	United States	North America	4	10	KL155(Very high)	OCL1(High)	1	0	0	0	0	0	1	0	0	0	0
GCF_000949195	2	208	IC2	2.4	2.4.12	2008	United States	North America	8	21	KL2(Very high)	OCL1(Very high)	1	1	1	0	1	1	1	0	0	0	1
GCF_000963815	1	945	IC1	1.4	1.4.10	2008	United States	North America	7	19	KL25(Very high)	OCL2(Very high)	1	0	1	0	0	1	0	1	0	0	1
GCF_000972525	10	447	IC8			2011	United States	North America	8	19	KL49(Good)	OCL2(Very high)	1	1	1	0	0	1	1	1	0	0	1
GCF_000972625	10	447	IC8			2011	United States	North America	8	19	KL49(Perfect)	OCL2(Very high)	1	1	1	0	0	1	1	1	0	0	1
GCF_001052015	2	208	IC2	2.4	2.4.2	2012	United States	North America	8	22	KL2(Very high)	OCL1(Very high)	1	1	1	0	1	1	1	0	0	0	1
GCF_001052325	2	208	IC2	2.4	2.4.2	2012	United States	North America	8	21	KL2(Very high)	OCL1(Very high)	1	1	1	0	1	1	1	0	0	0	1
GCF_001052675	2	208	IC2	2.4	2.4.2	2012	United States	North America	8	22	KL2(Very high)	OCL1(Very high)	1	1	1	0	1	1	1	0	0	0	1
GCF_001052775	2	208	IC2	2.4	2.4.2	2012	United States	North America	8	22	KL2(Very high)	OCL1(Very high)	1	1	1	0	1	1	1	0	0	0	1
GCF_001053695	2	208	IC2	2.4	2.4.2	2012	United States	North America	8	22	KL2(Very high)	OCL1(Very high)	1	1	1	0	1	1	1	0	0	0	1
GCF_001053755	1426	New Oxford ST				2012	United States	North America	3	6	KL90(Very high)	OCL4(Very high)	1	0	1	0	0	0	0	0	0	0	0
GCF_001055965	1140	New Oxford ST				2012	United States	North America	3	5	KL106(Perfect)	OCL9(Very high)	1	0	0	0	0	0	0	0	0	0	0
GCF_001059495	2	208	IC2	2.4	2.4.2	2012	United States	North America	8	22	KL2(Very high)	OCL1(Very high)	1	1	1	0	1	1	1	0	0	0	1
GCF_001414565	79	124	IC5			2008	United States	North America	5	14	KL151(Good)	OCL10(Good)	1	0	1	0	1	1	0	0	0	0	1
GCF_001414575	New Pasteur ST	New Oxford ST				2008	United States	North America	5	11	KL18(Very high)	OCL3(Very high)	1	1	1	0	0	0	0	0	0	0	0
GCF_001414645	2	208	IC2	2.4	2.4.2	2008	United States	North America	8	21	KL2(Good)	OCL1(Good)	1	1	1	0	1	1	1	0	0	0	1
GCF_001414655	406	1703				2008	United States	North America	5	12	KL9(Very high)	OCL6(Very high)	1	0	1	0	0	1	0	0	0	0	0
GCF_001414685	848	New Oxford ST				2008	United States	North America	3	5	KL104(Good)	OCL21(Perfect)	1	0	1	0	0	0	0	0	0	0	0
GCF_001414735	79	124	IC5			2008	United States	North America	5	16	KL151(Good)	OCL10(Very high)	1	0	1	0	1	1	0	0	0	0	1
GCF_001414765	New Pasteur ST	1752	IC9			2008	United States	North America	3	5	KL121(Very high)	OCL6(Very high)	1	0	1	0	0	0	0	0	0	0	0
GCF_001414785	79	124	IC5			2005	United States	North America	5	16	KL152(Good)	OCL10(Good)	1	0	1	0	1	1	0	0	0	0	1
GCF_001414805	79	124	IC5			2005	United States	North America	5	17	KL152(None)	OCL10(Good)	1	0	1	0	1	1	0	0	0	0	1
GCF_001414815	New Pasteur ST	124	IC5			2008	United States	North America	5	18	KL151(Good)	OCL10(Good)	1	0	1	0	1	1	0	0	0	0	1
GCF_001414865	2	452	IC2	2.2	2.2.6	2008	United States	North America	5	17	KL3(Very high)	OCL1(Good)	1	0	1	0	1	1	0	0	0	0	1
GCF_001414885	79	124	IC5			2005	United States	North America	5	17	KL152(Good)	OCL10(Good)	1	0	1	0	1	1	0	0	0	0	1
GCF_001414905	79	124	IC5			2006	United States	North America	5	16	KL152(None)	OCL10(Good)	1	0	1	0	1	1	0	0	0	0	1
GCF_001414915	498	New Oxford ST				2008	United States	North America	3	5	KL116(Very high)	OCL6(Very high)	1	0	1	0	0	0	0	0	0	0	0
GCF_001414925	79	124	IC5			2005	United States	North America	5	17	KL152(None)	OCL10(Good)	1	0	1	0	1	1	0	0	0	0	1
GCF_001414935	79	124	IC5			2006	United States	North America	5	17	KL152(Good)	OCL10(Good)	1	0	1	0	1	1	0	0	0	0	1
GCF_001414985	New Pasteur ST	124	IC5			2007	United States	North America	5	17	KL151(Good)	OCL10(Very high)	1	0	1	0	1	1	0	0	0	0	1
GCF_001414995	79	124	IC5			2006	United States	North America	5	17	KL152(Good)	OCL10(Good)	1	0	1	0	1	1	0	0	0	0	1
GCF_001415015	79	124	IC5			2008	United States	North America	5	17	KL151(Good)	OCL10(Very high)	1	0	1	0	1	1	0	0	0	0	1
GCF_001415025	79	New Oxford ST	IC5			2009	United States	North America	5	18	KL173(Good)	OCL10(Very high)	1	0	1	0	1	1	0	0	0	0	1
GCF_001415065	49	New Oxford ST				2009	United States	North America	4	6	KL11(None)	OCL8(Good)	1	0	1	0	0	1	0	0	0	0	0
GCF_001415085	49	128				2009	United States	North America	4	6	KL11(Perfect)	OCL8(Very high)	1	0	1	0	0	1	0	0	0	0	0
GCF_001415095	2	473	IC2	2.4	2.4.2	2009	United States	North America	8	20	KL22(Good)	OCL1(Very high)	1	1	1	0	1	1	1	0	0	0	1
GCF_001415165	406	1703				2009	United States	North America	6	13	KL152(None)	OCL1(Very high)	1	0	1	0	0	1	1	0	0	0	0
GCF_001415215	New Pasteur ST	1703				2009	United States	North America	5	12	KL9(None)	OCL1(Good)	1	0	1	0	0	1	0	0	0	0	0
GCF_001415255	New Pasteur ST	New Oxford ST	IC2	2.4	2.4.2	2009	United States	North America	8	19	KL2(Good)	OCL18(Low)	1	1	1	0	1	1	1	0	0	0	1
GCF_001415275	2	473	IC2	2.4	2.4.2	2009	United States	North America	8	20	KL22(None)	OCL1(Good)	1	1	1	0	0	1	1	0	0	0	1
GCF_001415295	79	124	IC5			2006	United States	North America	5	16	KL152(None)	OCL10(Good)	1	0	1	0	1	1	0	0	0	0	1
GCF_001415325	79	New Oxford ST	IC5			2007	United States	North America	5	17	KL109(None)	OCL10(Very high)	1	0	1	0	1	1	0	0	0	0	1
GCF_001415345	79	New Oxford ST	IC5			2009	United States	North America	5	17	KL2(Good)	OCL10(Good)	1	0	1	0	1	1	0	0	0	0	1
GCF_001415355	79	New Oxford ST	IC5			2009	United States	North America	5	15	KL9(Good)	OCL10(Good)	1	0	1	0	0	1	0	0	0	0	1
GCF_001415385	79	124	IC5			2009	United States	North America	5	15	KL152(Good)	OCL10(Good)	1	0	1	0	0	1	0	0	0	0	1
GCF_001415425	79	762	IC5			2009	United States	North America	5	16	KL9(None)	OCL10(Very high)	1	0	1	0	1	1	0	0	0	0	1
GCF_001415435	103	New Oxford ST				2009	United States	North America	2	4	KL24(Good)	OCL7(Good)	1	0	0	0	0	0	0	0	0	0	0
GCF_001415465	New Pasteur ST	New Oxford ST	IC2	2.4	2.4.2	2009	United States	North America	8	19	KL2(None)	OCL1(Good)	1	1	1	0	1	1	1	0	0	0	1
GCF_001415505	499	345				2009	United States	North America	4	9	KL18(Good)	OCL3(Good)	1	0	1	0	0	0	0	0	0	0	0
GCF_001415515	499	345				2009	United States	North America	5	12	KL18(Good)	OCL3(Good)	1	1	1	0	0	0	0	0	0	0	0
GCF_001415535	New Pasteur ST	New Oxford ST	IC2	2.4	2.4.2	2009	United States	North America	5	12	KL2(Good)	OCL1(Good)	1	1	1	0	1	0	0	0	0	0	1
GCF_001415595	79	124	IC5			2010	United States	North America	5	16	KL9(None)	OCL11(Good)	1	0	1	0	1	1	0	0	0	0	1
GCF_001415615	499	345				2010	United States	North America	5	11	KL18(Good)	OCL3(Very high)	1	1	1	0	0	0	0	0	0	0	0
GCF_001415645	2	208	IC2	2.4	2.4.2	2010	United States	North America	8	19	KL2(Good)	OCL1(Good)	1	1	1	0	1	1	1	0	0	0	1
GCF_001415665	New Pasteur ST	New Oxford ST				2010	United States	North America	2	4	KL105(None)	OCL9(Very high)	1	0	0	0	0	0	0	0	0	0	0
GCF_001415695	2	281	IC2	2.2	2.2.4	2010	United States	North America	6	17	KL22(Good)	OCL3(Very high)	1	0	1	0	1	1	1	0	0	0	1
GCF_001415715	2	473	IC2	2.4	2.4.2	2011	United States	North America	8	20	KL22(None)	OCL1(Good)	1	1	1	0	1	1	1	0	0	0	1
GCF_001415735	2	208	IC2	2.4	2.4.2	2011	United States	North America	7	17	KL2(None)	OCL1(Good)	1	1	1	0	1	1	0	0	0	0	1
GCF_001415765	2	208	IC2	2.4	2.4.2	2011	United States	North America	8	20	KL2(None)	OCL1(Good)	1	1	1	0	1	1	1	0	0	0	1
GCF_001415785	79	124	IC5			2011	United States	North America	7	20	KL152(None)	OCL10(Good)	1	0	1	0	0	1	1	0	0	0	1
GCF_001415805	406	1703				2011	United States	North America	5	15	KL9(None)	OCL1(Good)	1	0	1	0	0	1	0	0	0	0	0
GCF_001415815	New Pasteur ST	208	IC2	2.4	2.4.2	2011	United States	North America	8	20	KL213(None)	OCL7(Good)	1	1	1	0	1	1	1	0	0	0	1
GCF_001415835	250	1739				2011	United States	North America	2	4	KL155(None)	OCL1(Good)	1	0	0	0	0	0	0	0	0	0	0
GCF_001415875	79	205	IC5			2011	United States	North America	5	16	KL3(None)	OCL10(Good)	1	0	1	0	1	1	0	0	0	0	1
GCF_001415915	428	1772				2009	United States	North America	2	4	KL37(Good)	OCL13(Good)	1	0	0	0	0	0	0	0	0	0	0
GCF_001415965	499	345				2010	United States	North America	5	11	KL18(Good)	OCL3(Very high)	1	1	1	0	0	0	0	0	0	0	0
GCF_001415985	406	1703				2010	United States	North America	4	11	KL9(Good)	OCL10(Good)	1	0	1	0	0	0	0	0	0	0	0
GCF_001416005	New Pasteur ST	124	IC5			2010	United States	North America	5	17	KL151(None)	OCL10(Good)	1	0	1	0	1	1	0	0	0	0	1
GCF_001416015	New Pasteur ST	New Oxford ST	IC8			2010	United States	North America	3	5	KL62(Good)	OCL6(Very high)	1	0	1	0	0	0	0	0	0	0	0
GCF_001416035	79	New Oxford ST	IC5			2010	United States	North America	5	16	KL9(None)	OCL10(Good)	1	0	1	0	1	1	0	0	0	0	1
GCF_001416075	2	208	IC2	2.4	2.4.2	2011	United States	North America	5	11	KL213(None)	OCL1(Good)	1	0	1	0	0	1	0	0	0	0	1
GCF_001416095	2	208	IC2	2.4	2.4.2	2011	United States	North America	6	13	KL2(Good)	OCL1(Very high)	1	1	1	0	1	1	0	0	0	0	1
GCF_001416115	1337	New Oxford ST				2011	United States	North America	3	5	KL32(None)	OCL13(Good)	1	0	1	0	0	0	0	0	0	0	0
GCF_001416145	499	345				2012	United States	North America	5	13	KL18(Good)	OCL3(Good)	1	1	1	0	0	0	0	0	0	0	0
GCF_001416155	499	345				2012	United States	North America	5	13	KL18(Good)	OCL3(Good)	1	1	1	0	0	0	0	0	0	0	0
GCF_001416165	499	345				2012	United States	North America	5	12	KL18(Good)	OCL3(Good)	1	1	1	0	0	0	0	0	0	0	0
GCF_001416225	2	208	IC2	2.4	2.4.2	2012	United States	North America	6	13	KL2(None)	OCL18(Low)	1	1	1	0	1	1	0	0	0	0	1
GCF_001416235	406	1703				2012	United States	North America	4	11	KL9(None)	OCL11(Good)	1	0	1	0	0	0	0	0	0	0	0
GCF_001416255	New Pasteur ST	1703				2012	United States	North America	6	19	KL9(None)	OCL1(Good)	1	0	1	0	0	1	1	0	0	0	0
GCF_001416275	2	208	IC2	2.4	2.4.2	2012	United States	North America	5	13	KL2(None)	OCL8(None)	1	1	1	0	0	0	0	0	0	0	1
GCF_001416305	499	345				2012	United States	North America	6	18	KL18(Good)	OCL3(Very high)	1	1	1	0	1	1	0	0	0	0	0
GCF_001416315	150	New Oxford ST				2012	United States	North America	3	5	KL94(None)	OCL6(Very high)	1	0	1	0	0	0	0	0	0	0	0
GCF_001420505	2	204	IC2	2.2	2.2.5	Unknown	South Africa	Africa	6	14	KL12(Very high)	OCL1(Very high)	1	1	1	0	1	1	0	0	0	0	0
GCF_001420515	2	350	IC2	2.2	2.2.2	2011	United Kingdom	Europe	5	12	KL9(Very high)	OCL1(Very high)	1	0	1	0	0	1	0	0	0	0	1
GCF_001432265	85	1089	IC9			2012	Lebanon	Asia	8	15	KL152(Good)	OCL6(Very high)	1	0	1	0	0	1	1	0	0	0	1
GCF_001432275	85	1089	IC9			2012	Lebanon	Asia	8	15	KL152(Perfect)	OCL6(Very high)	1	0	1	0	0	1	1	0	0	0	1
GCF_001416355	79	New Oxford ST	IC5			2013	United States	North America	5	17	KL173(Good)	OCL10(Very high)	1	0	1	0	1	1	0	0	0	0	1
GCF_001416385	79	New Oxford ST	IC5			2013	United States	North America	5	17	KL9(None)	OCL10(Good)	1	0	1	0	1	1	0	0	0	0	1
GCF_001416395	New Pasteur ST	New Oxford ST	IC5			2013	United States	North America	5	17	KL9(None)	OCL10(Good)	1	0	1	0	1	1	0	0	0	0	1
GCF_001416415	79	New Oxford ST	IC5			2013	United States	North America	5	17	KL173(None)	OCL10(Good)	1	0	1	0	1	1	0	0	0	0	1
GCF_001416425	79	New Oxford ST	IC5			2013	United States	North America	5	18	KL9(None)	OCL10(Good)	1	0	1	0	1	1	0	0	0	0	1
GCF_001416465	2	473	IC2	2.4	2.4.2	2013	United States	North America	7	16	KL22(None)	OCL1(Good)	1	1	1	0	1	1	0	0	0	0	1
GCF_001416475	New Pasteur ST	New Oxford ST				Unknown	United States	North America	2	4	KL83(Very high)	OCL9(Very high)	1	0	0	0	0	0	0	0	0	0	0
GCF_001416495	154	943				Unknown	United States	North America	2	4	KL58(None)	OCL6(Very high)	1	0	0	0	0	0	0	0	0	0	0
GCF_001416515	406	1703				2012	United States	North America	5	16	KL9(Good)	OCL1(Very high)	1	0	1	0	0	1	0	0	0	0	0
GCF_001416545	406	1703				2012	United States	North America	5	16	KL9(Good)	OCL1(Very high)	1	0	1	0	0	1	0	0	0	0	0
GCF_001416555	406	1703				2012	United States	North America	6	21	KL9(None)	OCL3(Good)	1	1	1	0	0	1	0	0	0	0	0
GCF_001416565	499	345				2012	United States	North America	6	21	KL18(Good)	OCL3(Very high)	1	1	1	0	1	1	0	0	0	0	0
GCF_001416585	406	1703				2012	United States	North America	5	19	KL9(Good)	OCL1(Good)	1	0	1	0	0	1	0	0	0	0	0
GCF_001416625	250	1739				2012	United States	North America	2	4	KL155(None)	OCL1(Good)	1	0	0	0	0	0	0	0	0	0	0
GCF_001416635	79	New Oxford ST	IC5			2013	United States	North America	5	17	KL173(None)	OCL10(Low)	1	0	1	0	1	1	0	0	0	0	1
GCF_001416655	New Pasteur ST	New Oxford ST	IC5			2013	United States	North America	5	17	KL9(Good)	OCL10(Very high)	1	0	1	0	1	1	0	0	0	0	1
GCF_001416665	New Pasteur ST	New Oxford ST	IC5			2013	United States	North America	5	17	KL173(None)	OCL10(Good)	1	0	1	0	1	1	0	0	0	0	1
GCF_001416705	79	New Oxford ST	IC5			2013	United States	North America	5	17	KL9(None)	OCL10(None)	1	0	1	0	1	1	0	0	0	0	1
GCF_001416715	79	124	IC5			2013	United States	North America	5	18	KL9(None)	OCL10(Good)	1	0	1	0	1	1	0	0	0	0	1
GCF_001417485	79	New Oxford ST	IC5			2013	United States	North America	5	17	KL9(Good)	OCL10(Very high)	1	0	1	0	1	1	0	0	0	0	1
GCF_001417495	New Pasteur ST	New Oxford ST	IC5			2013	United States	North America	5	15	KL173(None)	OCL10(Very high)	1	0	1	0	0	1	0	0	0	0	1
GCF_001417515	79	New Oxford ST	IC5			Unknown	United States	North America	5	17	KL9(None)	OCL10(Good)	1	0	1	0	1	1	0	0	0	0	1
GCF_001417545	79	New Oxford ST	IC5			2013	United States	North America	5	17	KL9(Good)	OCL10(Good)	1	0	1	0	1	1	0	0	0	0	1
GCF_001432375	406	310				2005	United States	North America	5	13	KL1(Very high)	OCL1(Very high)	1	0	1	0	0	1	0	0	0	0	0
GCF_001432385	79	124	IC5			2005	United States	North America	5	17	KL151(Good)	OCL10(Very high)	1	0	1	0	1	1	0	0	0	0	1
GCF_001432425	372	New Oxford ST				2005	United States	North America	2	4	KL86(None)	OCL13(Good)	1	0	0	0	0	0	0	0	0	0	0
GCF_001432445	2	281	IC2	2.2	2.2.4	2005	United States	North America	4	11	KL22(High)	OCL7(Very high)	1	0	1	0	0	0	0	0	0	0	1
GCF_001432455	6	878	IC9			2005	United States	North America	3	5	KL120(Perfect)	OCL6(Very high)	1	0	1	0	0	0	0	0	0	0	0
GCF_001432525	79	124	IC5			2005	United States	North America	5	17	KL152(Good)	OCL10(Very high)	1	0	1	0	1	1	0	0	0	0	1
GCF_001432535	New Pasteur ST	1703				2006	United States	North America	4	8	KL9(Very high)	OCL1(Very high)	1	0	1	0	0	0	0	0	0	0	0
GCF_001432545	25	229	IC7			2005	United States	North America	5	13	KL14(Perfect)	OCL5(Very high)	1	0	1	0	0	1	0	0	0	0	1
GCF_001432585	New Pasteur ST	1703				2006	United States	North America	5	15	KL9(Very high)	OCL1(Very high)	1	0	1	0	0	1	0	0	0	0	0
GCF_001432595	1022	New Oxford ST				2006	United States	North America	3	7	KL20(Very high)	OCL4(Very high)	1	0	0	0	1	0	0	0	0	0	0
GCF_001432625	79	124	IC5			2006	United States	North America	4	13	KL151(None)	OCL10(Good)	1	0	1	0	0	0	0	0	0	0	1
GCF_001432665	78	2454	IC6			2006	United States	North America	3	5	KL2(Very high)	OCL1(Very high)	1	0	1	0	0	0	0	0	0	0	0
GCF_001432685	1022	New Oxford ST				2005	United States	North America	3	7	KL20(Very high)	OCL4(Very high)	1	0	0	0	1	0	0	0	0	0	0
GCF_001432705	1022	New Oxford ST				2005	United States	North America	3	7	KL20(Very high)	OCL4(Very high)	1	0	0	0	1	0	0	0	0	0	0
GCF_001432745	497	New Oxford ST				2005	United States	North America	3	4	KL19(None)	OCL13(Good)	1	0	1	0	0	0	0	0	0	0	0
GCF_001432755	2	208	IC2	2.4	2.4.1	2005	United States	North America	5	12	KL2(Very high)	OCL1(Very high)	1	1	1	0	1	0	0	0	0	0	1
GCF_001432785	406	1703				2005	United States	North America	5	13	KL9(Very high)	OCL1(Very high)	1	0	1	0	0	1	0	0	0	0	0
GCF_001432825	32	New Oxford ST				2005	United States	North America	3	5	KL2(Very high)	OCL6(Very high)	1	0	1	0	0	0	0	0	0	0	0
GCF_001432845	78	944	IC6			2006	United States	North America	4	7	KL155(None)	OCL1(Good)	1	0	1	0	0	0	0	0	0	0	1
GCF_001432895	New Pasteur ST	1703				2006	United States	North America	5	13	KL9(Very high)	OCL1(Very high)	1	0	1	0	0	1	0	0	0	0	0
GCF_001432925	New Pasteur ST	124	IC5			2006	United States	North America	5	17	KL151(Good)	OCL10(Very high)	1	0	1	0	1	1	0	0	0	0	1
GCF_001432965	79	124	IC5			2007	United States	North America	4	13	KL152(None)	OCL10(None)	1	0	1	0	1	0	0	0	0	0	1
GCF_001432975	79	124	IC5			2007	United States	North America	5	17	KL151(Good)	OCL10(Very high)	1	0	1	0	1	1	0	0	0	0	1
GCF_001433005	New Pasteur ST	New Oxford ST				2007	United States	North America	4	8	KL29(Perfect)	OCL8(Very high)	1	1	0	0	0	1	0	0	0	0	0
GCF_001433015	79	124	IC5			2007	United States	North America	5	15	KL151(Good)	OCL10(Very high)	1	0	1	0	0	1	0	0	0	0	1
GCF_001433045	2	208	IC2	2.4	2.4.2	2007	United States	North America	7	20	KL2(Very high)	OCL1(Very high)	1	0	1	0	1	1	1	0	0	0	1
GCF_001433055	79	124	IC5			2008	United States	North America	5	17	KL152(Good)	OCL10(Good)	1	0	1	0	1	1	0	0	0	0	1
GCF_001433075	406	1703				2006	United States	North America	4	10	KL9(None)	OCL1(Good)	1	0	1	0	0	0	0	0	0	0	0
GCF_001433145	New Pasteur ST	1703				2007	United States	North America	5	14	KL9(Very high)	OCL1(Very high)	1	0	1	0	0	1	0	0	0	0	0
GCF_001433155	497	New Oxford ST				2007	United States	North America	3	5	KL32(None)	OCL6(Very high)	1	0	1	0	0	0	0	0	0	0	0
GCF_001433205	2	281	IC2	2.2	2.2.4	2007	United States	North America	5	11	KL22(High)	OCL3(Very high)	1	0	1	0	1	1	0	0	0	0	1
GCF_001433245	79	New Oxford ST	IC5			2007	United States	North America	5	17	KL173(Perfect)	OCL10(Very high)	1	0	1	0	1	1	0	0	0	0	1
GCF_001433265	406	1703				2007	United States	North America	6	15	KL9(Very high)	OCL1(Very high)	1	0	1	0	0	1	1	0	0	0	0
GCF_001433275	79	New Oxford ST	IC5			2007	United States	North America	5	16	KL173(Very high)	OCL10(Very high)	1	0	1	0	1	1	0	0	0	0	1
GCF_001433335	79	124	IC5			2008	United States	North America	5	14	KL151(Very high)	OCL10(Good)	1	0	1	0	1	1	0	0	0	0	1
GCF_001433355	New Pasteur ST	207	IC1	1.4	1.4.9	2008	United States	North America	4	10	KL4(None)	OCL3(Low)	1	0	1	0	0	0	0	0	0	0	1
GCF_001433655	79	124	IC5			2007	United States	North America	4	16	KL151(Good)	OCL10(Very high)	1	0	0	0	1	1	0	0	0	0	1
GCF_001500225	15	New Oxford ST	IC4			2003	Brazil	South America	5	9	KL9(Very high)	OCL7(Very high)	1	0	1	0	0	1	0	0	0	0	1
GCF_001511855	1	231	IC1	1.4	1.4.3	1999	Australia	Oceania	7	15	KL1(Good)	OCL1(Perfect)	1	1	1	0	1	1	0	0	0	0	1
GCF_001511875	1	231	IC1	1.4	1.4.3	1995	Australia	Oceania	7	15	KL1(Very high)	OCL1(Perfect)	1	1	1	0	1	1	0	0	0	0	1
GCF_001511895	1	231	IC1	1.4	1.4.3	1997	Australia	Oceania	7	15	KL1(Very high)	OCL1(Perfect)	1	1	1	0	1	1	0	0	0	0	1
GCF_001511915	1	441	IC1	1.4	1.4.10	2010	Australia	Oceania	7	15	KL4(Very high)	OCL1(Good)	1	1	1	0	0	1	0	0	0	0	1
GCF_001511935	1	231	IC1	1.4	1.4.3	2008	Australia	Oceania	5	12	KL1(Perfect)	OCL1(Very high)	1	0	1	0	0	1	0	0	0	0	1
GCF_001511975	1	231	IC1	1.4	1.4.3	2005	Australia	Oceania	5	12	KL1(Perfect)	OCL1(Very high)	1	0	1	0	0	1	0	0	0	0	1
GCF_001511995	1	441	IC1	1.4	1.4.10	2010	Australia	Oceania	7	15	KL4(Very high)	OCL1(Good)	1	1	1	0	0	1	0	0	0	0	1
GCF_001512015	1	231	IC1	1.4	1.4.3	1998	Australia	Oceania	7	15	KL1(Good)	OCL1(Perfect)	1	1	1	0	1	1	0	0	0	0	1
GCF_001512035	1	231	IC1	1.4	1.4.3	2006	Australia	Oceania	5	12	KL1(Good)	OCL1(Perfect)	1	0	1	0	0	1	0	0	0	0	1
GCF_001512055	1	439	IC1	1.4	1.4.3	2002	Australia	Oceania	6	16	KL20(Perfect)	OCL4(Perfect)	1	1	1	0	1	1	0	0	0	0	0
GCF_001512075	1	781	IC1	1.4	1.4.9	2002	Australia	Oceania	7	16	KL15(Perfect)	OCL3(Perfect)	1	1	1	0	1	1	0	0	0	0	1
GCF_001512095	1	231	IC1	1.4	1.4.3	2010	Australia	Oceania	5	12	KL1(Good)	OCL1(Perfect)	1	0	1	0	0	1	0	0	0	0	1
GCF_001512115	1	231	IC1	1.4	1.4.3	1998	Australia	Oceania	7	15	KL1(Good)	OCL1(Perfect)	1	1	1	0	1	1	0	0	0	0	1
GCF_001512135	1	781	IC1	1.4	1.4.9	2003	Australia	Oceania	8	18	KL15(Perfect)	OCL3(Perfect)	1	1	1	0	1	1	0	1	0	0	1
GCF_001512155	1	231	IC1	1.4	1.4.9	2009	Australia	Oceania	5	12	KL1(Very high)	OCL5(Very high)	1	0	1	0	0	1	0	0	0	0	1
GCF_001512175	1	781	IC1	1.4	1.4.9	2002	Australia	Oceania	7	16	KL15(Perfect)	OCL3(Perfect)	1	1	1	0	1	1	0	0	0	0	1
GCF_001512195	1	231	IC1	1.4	1.4.9	2003	Australia	Oceania	6	14	KL17(Perfect)	OCL1(Perfect)	1	1	1	0	1	1	0	0	0	0	0
GCF_001512215	1	231	IC1	1.4	1.4.0	1984	Australia	Oceania	7	16	KL1(Perfect)	OCL1(Perfect)	1	1	1	0	1	1	0	1	0	0	0
GCF_001512235	1	231	IC1	1.4	1.4.3	2002	Australia	Oceania	5	12	KL1(Perfect)	OCL1(Very high)	1	0	1	0	0	1	0	0	0	0	1
GCF_001512255	1	231	IC1	1.4	1.4.3	1997	Australia	Oceania	6	13	KL1(Perfect)	OCL1(Perfect)	1	1	1	0	0	1	0	0	0	0	1
GCF_001514375	2	191	IC2	2.4	2.4.10	2012	South Korea	Asia	7	21	KL72(Very high)	OCL1(Very high)	1	0	1	0	1	1	1	0	0	0	1
GCF_001516805	54	956				2015	India	Asia	3	6	KL81(Low)	OCL6(Very high)	1	0	1	0	0	0	0	0	0	0	0
GCF_001517645	126	819				2014	France	Europe	4	8	KL95(Very high)	OCL7(Very high)	1	0	1	0	0	0	0	0	0	0	0
GCF_001518715	2	1839	IC2	2.2	2.2.4	2009	United States	North America	7	24	KL22(Very high)	OCL3(High)	1	0	1	0	1	1	1	0	0	0	1
GCF_001433675	2	452	IC2	2.2	2.2.6	2007	United States	North America	5	17	KL3(Good)	OCL1(Very high)	1	0	1	0	1	1	0	0	0	0	1
GCF_001433695	79	124	IC5			2008	United States	North America	5	14	KL151(Good)	OCL10(Good)	1	0	1	0	1	1	0	0	0	0	1
GCF_001441355	10	447	IC8			2013	United States	North America	8	19	KL49(Perfect)	OCL2(Very high)	1	1	1	0	0	1	1	1	0	0	1
GCF_001441405	10	447	IC8			2013	United States	North America	8	19	KL49(Good)	OCL2(Very high)	1	1	1	0	0	1	1	1	0	0	1
GCF_001441415	10	447	IC8			2011	United States	North America	8	19	KL49(Perfect)	OCL2(Very high)	1	1	1	0	0	1	1	1	0	0	1
GCF_001441455	10	447	IC8			2011	United States	North America	8	19	KL49(Perfect)	OCL2(Very high)	1	1	1	0	0	1	1	1	0	0	1
GCF_001441465	10	447	IC8			2011	United States	North America	8	19	KL49(Perfect)	OCL2(Very high)	1	1	1	0	0	1	1	1	0	0	1
GCF_001541425	187	208	IC2	2.3	2.3.2	2011	Spain	Europe	6	16	KL2(Very high)	OCL1(Very high)	1	1	1	0	0	1	0	0	0	0	1
GCF_001541455	745	208	IC2	2.3	2.3.2	2011	Spain	Europe	6	15	KL2(Good)	OCL1(Very high)	1	1	1	0	1	1	0	0	0	0	1
GCF_001541525	2	218	IC2	2.2	2.2.5	2011	Spain	Europe	6	14	KL42(Very high)	OCL1(Good)	1	1	1	0	1	1	0	0	0	0	1
GCF_001541685	2	218	IC2	2.2	2.2.5	2011	Spain	Europe	6	15	KL42(Good)	OCL1(Good)	1	1	1	0	1	1	0	0	0	0	1
GCF_001541695	2	218	IC2	2.2	2.2.5	2011	Spain	Europe	6	16	KL42(Very high)	OCL1(Good)	1	1	1	0	1	1	0	0	0	0	1
GCF_001541705	187	208	IC2	2.3	2.3.2	2011	Spain	Europe	6	16	KL2(Good)	OCL1(Very high)	1	1	1	0	0	1	0	0	0	0	1
GCF_001541725	187	208	IC2	2.3	2.3.2	2011	Spain	Europe	6	16	KL2(Good)	OCL1(Low)	1	1	1	0	0	1	0	0	0	0	1
GCF_001541765	187	208	IC2	2.3	2.3.2	2011	Spain	Europe	6	16	KL2(Good)	OCL1(Very high)	1	1	1	0	0	1	0	0	0	0	1
GCF_001541775	745	208	IC2	2.3	2.3.2	2011	Spain	Europe	6	15	KL2(Good)	OCL1(Very high)	1	1	1	0	1	1	0	0	0	0	1
GCF_001541795	187	208	IC2	2.3	2.3.2	2011	Spain	Europe	6	16	KL2(Good)	OCL1(Very high)	1	1	1	0	0	1	0	0	0	0	1
GCF_001541875	187	208	IC2	2.3	2.3.2	2011	Spain	Europe	6	16	KL2(Very high)	OCL1(Very high)	1	1	1	0	0	1	0	0	0	0	1
GCF_001543995	2	191	IC2	2.4	2.4.10	2014	South Korea	Asia	7	24	KL72(Very high)	OCL1(Very high)	1	0	1	0	1	1	1	0	0	0	1
GCF_001549575	1	231	IC1	1.4	1.4.0	2011	Mexico	North America	3	6	KL1(Perfect)	OCL1(Perfect)	1	0	1	0	0	0	0	0	0	0	0
GCF_001573065	2	457	IC2	2.5	2.5.2	2009	China	Asia	6	20	KL49(Very high)	OCL1(Very high)	1	1	1	0	1	1	0	0	0	0	1
GCF_001573085	2	368	IC2	2.3	2.3.3	2009	China	Asia	7	20	KL34(Perfect)	OCL1(Very high)	1	1	1	0	1	1	1	0	0	0	1
GCF_001573105	215	806	IC2	2.4	2.4.14	2010	China	Asia	8	24	KL10(Very high)	OCL5(Very high)	1	1	1	0	1	1	1	0	0	0	1
GCF_001573125	2	381	IC2	2.4	2.4.7	2010	China	Asia	7	23	KL77(Perfect)	OCL1(Very high)	1	0	1	0	1	1	1	0	0	0	1
GCF_001576615	2	848	IC2	2.3	2.3.2	2003	United Kingdom	Europe	6	16	KL13(Perfect)	OCL1(Good)	1	1	1	0	1	1	0	0	0	0	1
GCF_001578145	23	642	IC8			2010	China	Asia	6	15	KL8(Very high)	OCL2(Very high)	1	1	1	0	0	1	0	0	0	0	1
GCF_001593425	437	112				1951	France	Europe	4	6	KL3(Perfect)	OCL2(Very high)	1	0	1	0	0	1	0	0	0	0	0
GCF_001441475	10	447	IC8			2011	United States	North America	8	19	KL49(Perfect)	OCL2(Very high)	1	1	1	0	0	1	1	1	0	0	1
GCF_001441485	10	447	IC8			2011	United States	North America	8	19	KL49(Perfect)	OCL2(Very high)	1	1	1	0	0	1	1	1	0	0	1
GCF_001441545	10	391	IC8			2003	United States	North America	6	15	KL9(Very high)	OCL2(Very high)	1	1	1	0	0	1	0	0	0	0	0
GCF_001441555	10	391	IC8			2003	United States	North America	7	16	KL9(Very high)	OCL2(Very high)	1	1	1	0	0	1	0	0	0	0	1
GCF_001441565	10	391	IC8			2003	United States	North America	6	15	KL9(Very high)	OCL2(Very high)	1	1	1	0	0	1	0	0	0	0	1
GCF_001441625	10	391	IC8			2003	United States	North America	6	15	KL9(Very high)	OCL2(Very high)	1	1	1	0	0	1	0	0	0	0	0
GCF_001441645	10	391	IC8			2003	United States	North America	6	15	KL9(Very high)	OCL2(Very high)	1	1	1	0	0	1	0	0	0	0	0
GCF_001442575	2	208	IC2	2.4	2.4.2	2011	United States	North America	7	16	KL2(Very high)	OCL1(Very high)	1	1	1	0	1	1	1	0	0	0	1
GCF_001443265	94	933	IC1	1.2	1.2.1	2011	United States	North America	7	16	KL15(Very high)	OCL13(None)	1	0	1	0	0	1	1	1	0	0	1
GCF_001444215	94	933	IC1	1.2	1.2.1	2011	United States	North America	7	16	KL15(Very high)	OCL5(Good)	1	0	1	0	0	1	1	1	0	0	1
GCF_001444225	94	933	IC1	1.2	1.2.1	2011	United States	North America	7	17	KL15(Very high)	OCL5(Good)	1	0	1	0	0	1	1	1	0	0	1
GCF_001444255	94	933	IC1	1.2	1.2.1	2012	United States	North America	7	17	KL15(Very high)	OCL5(Good)	1	0	1	0	0	1	1	1	0	0	1
GCF_001444265	94	933	IC1	1.2	1.2.1	2012	United States	North America	7	16	KL15(Good)	OCL5(Good)	1	0	1	0	0	1	1	1	0	0	1
GCF_001446715	742	1133				2014	United States	North America	2	4	KL25(None)	OCL16(Good)	1	0	0	0	0	0	0	0	0	0	0
GCF_001457535	126	819				1950	United States	North America	3	6	KL95(Very high)	OCL7(Very high)	1	0	1	0	0	0	0	0	0	0	0
GCF_001471855	16	355				2013	United States	North America	5	10	KL24(Very high)	OCL7(Very high)	1	0	1	0	0	1	0	0	0	0	0
GCF_001531135	79	124	IC5			2014	United States	North America	5	12	KL151(Very high)	OCL10(Good)	1	0	1	0	0	1	0	0	0	0	1
GCF_001531205	2	208	IC2	2.4	2.4.2	2012	United States	North America	8	21	KL2(Very high)	OCL1(Very high)	1	1	1	0	1	1	1	0	0	0	1
GCF_001531265	79	124	IC5			2014	United States	North America	5	12	KL151(Good)	OCL10(Good)	1	0	1	0	0	1	0	0	0	0	1
GCF_001531455	2	208	IC2	2.4	2.4.2	2014	United States	North America	6	14	KL2(Very high)	OCL1(Very high)	1	1	1	0	1	1	0	0	0	0	1
GCF_001541025	2	208	IC2	2.4	2.4.2	2014	United States	North America	6	14	KL2(Very high)	OCL18(Low)	1	1	1	0	1	1	0	0	0	0	1
GCF_001541035	2	208	IC2	2.4	2.4.2	2014	United States	North America	6	14	KL2(Very high)	OCL1(Good)	1	1	1	0	1	1	0	0	0	0	1
GCF_001541045	2	208	IC2	2.3	2.3.2	2015	United States	North America	8	20	KL2(Very high)	OCL1(Very high)	1	1	1	0	1	1	1	0	0	0	1
GCF_001611995	25	993	IC7			2006	United States	North America	6	16	KL12(Very high)	OCL5(Very high)	1	1	1	0	0	1	0	0	0	0	1
GCF_001617825	2	451	IC2	2.4	2.4.6	2014	China	Asia	8	22	KL138(Good)	OCL1(Very high)	1	1	1	0	1	1	1	0	0	0	1
GCF_001617835	2	784	IC2	2.4	2.4.6	2014	China	Asia	6	17	KL14(Very high)	OCL1(Very high)	1	1	1	0	1	1	0	0	0	0	1
GCF_001617885	2	451	IC2	2.4	2.4.6	2014	China	Asia	8	22	KL138(Good)	OCL1(Very high)	1	1	1	0	1	1	1	0	0	0	1
GCF_001617895	2	195	IC2	2.5	2.5.6	2012	China	Asia	7	17	KL3(Very high)	OCL1(Very high)	1	1	1	0	1	1	1	0	0	0	1
GCF_001617915	2	208	IC2	2.4	2.4.13	2013	China	Asia	8	21	KL7(Very high)	OCL1(Very high)	1	1	1	0	0	1	1	0	0	0	1
GCF_001617945	2	208	IC2	2.4	2.4.13	2014	China	Asia	6	13	KL7(Very high)	OCL1(Very high)	1	1	1	0	0	1	0	0	0	0	1
GCF_001612005	20	449	IC1	1.4	1.4.2	2006	United States	North America	6	13	KL1(Good)	OCL1(Perfect)	1	0	1	0	0	1	1	0	0	0	1
GCF_001624975	2	1305	IC2	2.5	2.5.6	2015	India	Asia	7	17	KL3(Very high)	OCL1(Very high)	1	1	1	0	1	1	1	0	0	0	1
GCF_001636235	422	1321	IC5			2008	Mexico	North America	7	13	KL195(Perfect)	OCL10(Perfect)	1	1	1	0	0	1	0	0	0	0	1
GCF_001640065	604	208	IC2	2.5	2.5.3	2012	Saudi Arabia	Asia	5	16	KL2(Good)	OCL18(Good)	1	1	1	0	1	0	0	0	0	0	1
GCF_001640075	2	208	IC2	2.4	2.4.16	2012	Saudi Arabia	Asia	8	21	KL2(Very high)	OCL1(Very high)	1	1	1	0	1	1	1	0	0	0	1
GCF_001648035	1035	131				Unknown	Estonia	Europe	3	6	KL54(Very high)	OCL7(None)	1	0	1	0	0	0	0	0	0	0	0
GCF_001649595	107	1552				2013	Brazil	South America	6	12	KL231(None)	OCL13(None)	1	0	1	0	0	1	0	0	0	0	0
GCF_001649615	317	407				2010	Brazil	South America	5	10	KL162(None)	OCL8(Good)	1	0	1	0	0	0	1	0	0	0	0
GCF_001649625	317	407				2010	Brazil	South America	5	10	KL185(None)	OCL8(Good)	1	0	1	0	0	0	1	0	0	0	0
GCF_001649675	79	New Oxford ST	IC5			2011	Brazil	South America	7	17	KL9(None)	OCL10(None)	1	0	1	0	1	0	0	1	0	0	1
GCF_001649705	79	233	IC5			2011	Brazil	South America	8	19	KL9(None)	OCL11(None)	1	0	1	0	1	0	1	1	0	0	1
GCF_001649765	79	233	IC5			2011	Brazil	South America	6	15	KL49(Low)	OCL10(None)	1	0	1	0	1	0	0	1	0	0	1
GCF_001649795	79	233	IC5			2011	Brazil	South America	7	16	KL49(None)	OCL11(None)	1	0	1	0	1	1	0	1	0	0	1
GCF_001649805	79	233	IC5			2011	Brazil	South America	7	17	KL49(None)	OCL11(None)	1	0	1	0	1	1	0	1	0	0	1
GCF_001649815	107	1552				2013	Brazil	South America	6	12	KL43(None)	OCL13(None)	1	0	1	0	0	1	0	0	0	0	0
GCF_001649835	79	New Oxford ST	IC5			2011	Brazil	South America	7	15	KL49(None)	OCL11(None)	1	0	1	0	1	1	0	1	0	0	1
GCF_001649875	79	233	IC5			2011	Brazil	South America	6	15	KL49(None)	OCL10(None)	1	0	1	0	1	0	0	1	0	0	1
GCF_001649895	79	233	IC5			2011	Brazil	South America	7	17	KL49(None)	OCL10(None)	1	0	1	0	1	1	0	1	0	0	1
GCF_001649955	79	233	IC5			2012	Brazil	South America	7	17	KL49(None)	OCL1(None)	1	0	1	0	1	1	0	1	0	0	1
GCF_001649975	317	New Oxford ST				2012	Brazil	South America	4	7	KL185(None)	OCL6(None)	1	0	1	0	0	0	0	0	0	0	0
GCF_001657725	1	231	IC1	1.4	1.4.3	2000	Germany	Europe	7	16	KL1(Very high)	OCL1(Perfect)	1	1	1	0	0	1	0	0	0	0	1
GCF_001661665	2	208	IC2	2.4	2.4.13	2013	China	Asia	6	17	KL2(Very high)	OCL1(Very high)	1	1	1	0	1	1	0	0	0	0	1
GCF_001664565	2	417	IC2	2.3	2.3.2	2014	United States	North America	7	18	KL23(Very high)	OCL1(Very high)	1	1	1	0	1	1	1	0	0	0	1
GCF_001664575	2	281	IC2	2.2	2.2.4	2015	United States	North America	5	13	KL22(Very high)	OCL3(Good)	1	0	1	0	1	1	0	0	0	0	1
GCF_001664585	2	281	IC2	2.2	2.2.4	2015	United States	North America	5	13	KL22(Very high)	OCL3(Good)	1	0	1	0	1	1	0	0	0	0	1
GCF_001664595	2	195	IC2	2.5	2.5.6	2015	United States	North America	7	19	KL3(Very high)	OCL1(Very high)	1	1	1	0	1	1	1	0	0	0	1
GCF_001664645	2	208	IC2	2.4	2.4.12	2012	United States	North America	8	21	KL152(Very high)	OCL1(Very high)	1	1	1	0	1	1	1	0	0	0	1
GCF_001664655	2	New Oxford ST	IC2	2.2	2.2.5	2013	United States	North America	7	18	KL9(Very high)	OCL1(Good)	1	1	1	0	1	1	1	0	0	0	1
GCF_001664665	2	281	IC2	2.2	2.2.4	2015	United States	North America	5	13	KL22(Very high)	OCL3(Good)	1	0	1	0	1	1	0	0	0	0	1
GCF_001664685	1088	1703				2013	United States	North America	5	12	KL9(Very high)	OCL1(Very high)	1	0	1	0	0	1	0	0	0	0	0
GCF_001664725	2	281	IC2	2.2	2.2.4	2014	United States	North America	5	13	KL22(Very high)	OCL3(Good)	1	0	1	0	1	1	0	0	0	0	1
GCF_001664735	2	281	IC2	2.2	2.2.4	2014	United States	North America	5	13	KL22(Very high)	OCL3(Good)	1	0	1	0	1	1	0	0	0	0	1
GCF_001664755	2	281	IC2	2.2	2.2.4	2014	United States	North America	5	13	KL22(Very high)	OCL3(Good)	1	0	1	0	1	1	0	0	0	0	1
GCF_001664765	406	310				2013	United States	North America	3	8	KL1(Good)	OCL1(Very high)	1	0	0	0	0	0	0	0	0	0	0
GCF_001664805	2	208	IC2	2.4	2.4.12	2014	United States	North America	8	19	KL152(Very high)	OCL1(Very high)	1	1	1	0	0	1	1	0	0	0	1
GCF_001664815	250	1739				2015	United States	North America	5	11	KL155(Very high)	OCL1(Very high)	1	0	0	0	0	1	1	0	0	0	0
GCF_001664835	2	281	IC2	2.2	2.2.4	2013	United States	North America	5	13	KL22(Very high)	OCL3(Good)	1	0	1	0	1	1	0	0	0	0	1
GCF_001664855	2	281	IC2	2.2	2.2.4	2015	United States	North America	5	13	KL22(Very high)	OCL3(Good)	1	0	1	0	1	1	0	0	0	0	1
GCF_001664885	2	281	IC2	2.2	2.2.4	2015	United States	North America	5	13	KL22(Very high)	OCL3(Good)	1	0	1	0	1	1	0	0	0	0	1
GCF_001664895	2	208	IC2	2.4	2.4.2	2015	United States	North America	5	13	KL2(Good)	OCL1(Very high)	1	1	1	0	1	0	0	0	0	0	1
GCF_001664905	2	281	IC2	2.2	2.2.4	2015	United States	North America	5	11	KL22(Very high)	OCL3(Good)	1	0	1	0	1	1	0	0	0	0	1
GCF_001664915	2	208	IC2	2.4	2.4.2	2014	United States	North America	8	21	KL2(Good)	OCL1(Very high)	1	1	1	0	1	1	1	0	0	0	1
GCF_001664965	2	281	IC2	2.2	2.2.4	2013	United States	North America	5	13	KL22(Very high)	OCL3(Good)	1	0	1	0	1	1	0	0	0	0	1
GCF_001664975	2	281	IC2	2.2	2.2.4	2013	United States	North America	5	13	KL22(Very high)	OCL3(Good)	1	0	1	0	1	1	0	0	0	0	1
GCF_001664985	2	208	IC2	2.4	2.4.2	2015	United States	North America	7	17	KL2(Very high)	OCL1(Very high)	1	1	1	0	1	1	1	0	0	0	1
GCF_001665005	499	345				2015	United States	North America	6	13	KL18(Very high)	OCL3(High)	1	1	1	0	0	1	0	0	0	0	0
GCF_001665045	2	281	IC2	2.2	2.2.4	2014	United States	North America	5	12	KL22(Very high)	OCL3(Good)	1	0	1	0	1	1	0	0	0	0	1
GCF_001665055	2	281	IC2	2.2	2.2.4	2015	United States	North America	5	12	KL22(Very high)	OCL3(Good)	1	0	1	0	1	1	0	0	0	0	1
GCF_001665065	2	208	IC2	2.4	2.4.2	2013	United States	North America	8	21	KL2(Good)	OCL1(Very high)	1	1	1	0	1	1	1	0	0	0	1
GCF_001665095	2	540	IC2	2.4	2.4.6	2014	United States	North America	8	22	KL160(Good)	OCL1(Very high)	1	1	1	0	1	1	1	0	0	0	1
GCF_001665125	2	281	IC2	2.2	2.2.4	2013	United States	North America	5	13	KL22(Very high)	OCL3(Good)	1	0	1	0	1	1	0	0	0	0	1
GCF_001665145	406	310				2012	United States	North America	5	11	KL1(Very high)	OCL1(Very high)	1	0	1	0	1	1	0	0	0	0	0
GCF_001665155	632	281	IC2	2.2	2.2.4	2015	United States	North America	5	13	KL22(Very high)	OCL3(Good)	1	0	1	0	1	1	0	0	0	0	1
GCF_001665175	2	New Oxford ST	IC2	2.2	2.2.5	2013	United States	North America	6	14	KL9(Good)	OCL1(Good)	1	1	1	0	1	1	0	0	0	0	1
GCF_001665205	2	281	IC2	2.2	2.2.4	2013	United States	North America	5	13	KL22(Very high)	OCL3(Good)	1	0	1	0	0	1	0	0	0	0	1
GCF_001665215	2	281	IC2	2.2	2.2.4	2015	United States	North America	5	13	KL22(Very high)	OCL3(Good)	1	0	1	0	1	1	0	0	0	0	1
GCF_001665285	2	281	IC2	2.2	2.2.4	2015	United States	North America	4	12	KL22(Very high)	OCL3(Good)	1	0	0	0	1	1	0	0	0	0	1
GCF_001665985	2	281	IC2	2.2	2.2.4	2014	United States	North America	5	13	KL22(Very high)	OCL3(Good)	1	0	1	0	1	1	0	0	0	0	1
GCF_001666065	2	281	IC2	2.2	2.2.4	2015	United States	North America	5	13	KL22(Very high)	OCL3(Good)	1	0	1	0	1	1	0	0	0	0	1
GCF_001666075	2	281	IC2	2.2	2.2.4	2015	United States	North America	5	13	KL22(Very high)	OCL3(Good)	1	0	1	0	1	1	0	0	0	0	1
GCF_001666085	2	281	IC2	2.2	2.2.4	2015	United States	North America	6	15	KL22(Very high)	OCL3(Good)	1	1	1	0	1	1	0	0	0	0	1
GCF_001666105	2	281	IC2	2.2	2.2.4	2015	United States	North America	5	13	KL22(Very high)	OCL3(Good)	1	0	1	0	1	1	0	0	0	0	1
GCF_001666145	2	281	IC2	2.2	2.2.4	2013	United States	North America	5	13	KL22(Very high)	OCL3(Good)	1	0	1	0	1	1	0	0	0	0	1
GCF_001666155	2	281	IC2	2.2	2.2.4	2015	United States	North America	5	12	KL22(Very high)	OCL3(Good)	1	0	1	0	1	1	0	0	0	0	1
GCF_001666175	2	281	IC2	2.2	2.2.4	2012	United States	North America	5	15	KL22(High)	OCL3(Low)	1	0	1	0	1	1	0	0	0	0	1
GCF_001666195	2	208	IC2	2.4	2.4.2	2012	United States	North America	8	21	KL2(Very high)	OCL1(Very high)	1	1	1	0	1	1	1	0	0	0	1
GCF_001666225	250	1739				2012	United States	North America	5	11	KL155(Very high)	OCL1(Very high)	1	0	0	0	0	1	1	0	0	0	0
GCF_001666235	2	281	IC2	2.2	2.2.4	2013	United States	North America	5	13	KL22(Very high)	OCL3(Good)	1	0	1	0	1	1	0	0	0	0	1
GCF_001666255	2	281	IC2	2.2	2.2.4	2015	United States	North America	5	13	KL22(Very high)	OCL3(Good)	1	0	1	0	1	1	0	0	0	0	1
GCF_001666275	2	281	IC2	2.2	2.2.4	2015	United States	North America	5	13	KL22(Very high)	OCL3(Good)	1	0	1	0	1	1	0	0	0	0	1
GCF_001666305	2	281	IC2	2.2	2.2.4	2014	United States	North America	5	13	KL22(Very high)	OCL3(Good)	1	0	1	0	1	1	0	0	0	0	1
GCF_001666315	2	281	IC2	2.2	2.2.4	2015	United States	North America	5	13	KL22(Very high)	OCL3(Good)	1	0	1	0	1	1	0	0	0	0	1
GCF_001666325	2	350	IC2	2.2	2.2.5	2013	United States	North America	7	18	KL9(Good)	OCL1(Good)	1	1	1	0	1	1	1	0	0	0	1
GCF_001666365	1088	1703				2013	United States	North America	5	12	KL9(Very high)	OCL1(Very high)	1	0	1	0	0	1	0	0	0	0	0
GCF_001666385	2	281	IC2	2.2	2.2.4	2015	United States	North America	6	15	KL22(Very high)	OCL3(Good)	1	0	1	0	1	1	1	0	0	0	1
GCF_001666395	2	281	IC2	2.2	2.2.4	2014	United States	North America	5	13	KL22(Very high)	OCL3(Good)	1	0	1	0	1	1	0	0	0	0	1
GCF_001666405	632	281	IC2	2.2	2.2.4	2015	United States	North America	5	13	KL22(Good)	OCL3(Good)	1	0	1	0	1	1	0	0	0	0	1
GCF_001666425	2	281	IC2	2.2	2.2.4	2015	United States	North America	6	15	KL22(Very high)	OCL3(Good)	1	0	1	0	1	1	1	0	0	0	1
GCF_001666465	2	281	IC2	2.2	2.2.4	2015	United States	North America	5	13	KL22(Good)	OCL3(Good)	1	0	1	0	1	1	0	0	0	0	1
GCF_001666475	2	208	IC2	2.4	2.4.2	2014	United States	North America	8	22	KL2(Very high)	OCL1(High)	1	1	1	0	1	1	1	0	0	0	1
GCF_001666485	2	281	IC2	2.2	2.2.4	2015	United States	North America	5	13	KL22(Very high)	OCL3(Good)	1	0	1	0	1	1	0	0	0	0	1
GCF_001666515	2	281	IC2	2.2	2.2.4	2015	United States	North America	5	12	KL22(Very high)	OCL3(Good)	1	0	1	0	1	1	0	0	0	0	1
GCF_001666545	2	281	IC2	2.2	2.2.4	2015	United States	North America	6	16	KL22(High)	OCL3(Good)	1	1	1	0	1	1	0	0	0	0	1
GCF_001666555	2	281	IC2	2.2	2.2.4	2015	United States	North America	5	13	KL22(Very high)	OCL3(Good)	1	0	1	0	1	1	0	0	0	0	1
GCF_001666565	2	281	IC2	2.2	2.2.4	2014	United States	North America	5	13	KL22(Very high)	OCL3(Good)	1	0	1	0	1	1	0	0	0	0	1
GCF_001666575	2	281	IC2	2.2	2.2.4	2013	United States	North America	5	13	KL22(Very high)	OCL3(Good)	1	0	1	0	1	1	0	0	0	0	1
GCF_001666625	2	281	IC2	2.2	2.2.4	2015	United States	North America	5	13	KL22(Very high)	OCL11(Good)	1	0	1	0	1	1	0	0	0	0	1
GCF_001666635	2	281	IC2	2.2	2.2.4	2013	United States	North America	5	13	KL22(Very high)	OCL3(Good)	1	0	1	0	1	1	0	0	0	0	1
GCF_001666645	2	281	IC2	2.2	2.2.4	2013	United States	North America	5	13	KL22(Very high)	OCL3(Low)	1	0	1	0	1	1	0	0	0	0	1
GCF_001666665	2	208	IC2	2.4	2.4.2	2013	United States	North America	8	22	KL2(Very high)	OCL1(Very high)	1	1	1	0	1	1	1	0	0	0	1
GCF_001666705	2	350	IC2	2.2	2.2.5	2013	United States	North America	7	17	KL9(Good)	OCL1(Good)	1	1	1	0	1	1	1	0	0	0	1
GCF_001666715	2	281	IC2	2.2	2.2.4	2013	United States	North America	5	15	KL22(Very high)	OCL3(Good)	1	0	1	0	1	1	0	0	0	0	1
GCF_001668445	2	281	IC2	2.2	2.2.4	2014	United States	North America	5	13	KL22(Very high)	OCL3(Good)	1	0	1	0	1	1	0	0	0	0	1
GCF_001668465	2	281	IC2	2.2	2.2.4	2015	United States	North America	4	10	KL22(Very high)	OCL3(Good)	1	0	1	0	1	0	0	0	0	0	1
GCF_001668475	2	281	IC2	2.2	2.2.4	2014	United States	North America	5	13	KL22(Very high)	OCL3(Good)	1	0	1	0	1	1	0	0	0	0	1
GCF_001668515	2	281	IC2	2.2	2.2.4	2014	United States	North America	5	11	KL22(Very high)	OCL3(Good)	1	0	1	0	1	1	0	0	0	0	1
GCF_001668535	2	281	IC2	2.2	2.2.4	2014	United States	North America	4	10	KL22(Very high)	OCL3(Good)	1	0	1	0	1	0	0	0	0	0	1
GCF_001668555	2	281	IC2	2.2	2.2.4	2015	United States	North America	5	13	KL22(Very high)	OCL3(Good)	1	0	1	0	1	1	0	0	0	0	1
GCF_001668585	2	281	IC2	2.2	2.2.4	2015	United States	North America	5	12	KL22(Very high)	OCL3(Good)	1	0	1	0	1	1	0	0	0	0	1
GCF_001668645	2	281	IC2	2.2	2.2.4	2014	United States	North America	4	11	KL22(Very high)	OCL3(Low)	1	0	0	0	1	1	0	0	0	0	1
GCF_001668755	2	281	IC2	2.2	2.2.4	2014	United States	North America	5	13	KL22(Very high)	OCL3(Good)	1	0	1	0	1	1	0	0	0	0	1
GCF_001668765	2	281	IC2	2.2	2.2.4	2014	United States	North America	5	13	KL22(Very high)	OCL3(Good)	1	0	1	0	1	1	0	0	0	0	1
GCF_001668775	2	281	IC2	2.2	2.2.4	2014	United States	North America	5	13	KL22(Very high)	OCL3(Good)	1	0	1	0	1	1	0	0	0	0	1
GCF_001668815	2	281	IC2	2.2	2.2.4	2014	United States	North America	5	13	KL22(Very high)	OCL3(Good)	1	0	1	0	1	1	0	0	0	0	1
GCF_001668835	2	281	IC2	2.2	2.2.4	2014	United States	North America	5	12	KL22(Very high)	OCL3(Good)	1	0	1	0	1	1	0	0	0	0	1
GCF_001668855	2	281	IC2	2.2	2.2.4	2015	United States	North America	6	15	KL22(Very high)	OCL3(Good)	1	0	1	0	1	1	1	0	0	0	1
GCF_001668865	2	281	IC2	2.2	2.2.4	2014	United States	North America	5	13	KL22(Good)	OCL3(Good)	1	0	1	0	1	1	0	0	0	0	1
GCF_001668875	499	345				2015	United States	North America	6	15	KL18(Good)	OCL3(High)	1	1	1	0	0	1	0	0	0	0	0
GCF_001668915	2	281	IC2	2.2	2.2.4	2015	United States	North America	5	13	KL22(Very high)	OCL3(Good)	1	0	1	0	1	1	0	0	0	0	1
GCF_001668935	2	281	IC2	2.2	2.2.4	2015	United States	North America	5	13	KL22(Very high)	OCL3(Good)	1	0	1	0	1	1	0	0	0	0	1
GCF_001668945	2	281	IC2	2.2	2.2.4	2014	United States	North America	5	13	KL22(Very high)	OCL3(Good)	1	0	1	0	1	1	0	0	0	0	1
GCF_001668955	2	281	IC2	2.2	2.2.4	2016	United States	North America	5	13	KL22(Good)	OCL3(Good)	1	0	1	0	1	1	0	0	0	0	1
GCF_001668995	2	281	IC2	2.2	2.2.4	2014	United States	North America	5	13	KL22(Very high)	OCL3(Good)	1	0	1	0	1	1	0	0	0	0	1
GCF_001669005	2	281	IC2	2.2	2.2.4	2014	United States	North America	6	15	KL22(Very high)	OCL3(Good)	1	0	1	0	1	1	1	0	0	0	1
GCF_001669025	2	281	IC2	2.2	2.2.4	2015	United States	North America	4	10	KL22(Very high)	OCL3(Good)	1	0	1	0	1	0	0	0	0	0	1
GCF_001669035	2	417	IC2	2.3	2.3.2	2014	United States	North America	7	17	KL23(Very high)	OCL1(Very high)	1	1	1	0	1	1	1	0	0	0	1
GCF_001669075	2	417	IC2	2.3	2.3.2	2015	United States	North America	6	15	KL23(Very high)	OCL1(Very high)	1	1	1	0	1	0	1	0	0	0	1
GCF_001669095	2	281	IC2	2.2	2.2.4	2015	United States	North America	5	12	KL22(Very high)	OCL3(Good)	1	0	1	0	1	1	0	0	0	0	1
GCF_001669105	2	281	IC2	2.2	2.2.4	2015	United States	North America	5	12	KL22(Very high)	OCL3(Low)	1	0	1	0	1	0	1	0	0	0	1
GCF_001669115	2	281	IC2	2.2	2.2.4	2015	United States	North America	5	12	KL22(Very high)	OCL3(Low)	1	0	1	0	1	0	1	0	0	0	1
GCF_001669145	2	281	IC2	2.2	2.2.4	2015	United States	North America	6	17	KL22(Very high)	OCL3(High)	1	1	1	0	1	1	0	0	0	0	1
GCF_001669175	2	281	IC2	2.2	2.2.4	2016	United States	North America	5	13	KL22(Very high)	OCL3(Good)	1	0	1	0	1	1	0	0	0	0	1
GCF_001669185	2	208	IC2	2.4	2.4.12	2015	United States	North America	5	12	KL152(Very high)	OCL1(Very high)	1	1	1	0	1	0	0	0	0	0	1
GCF_001669195	2	281	IC2	2.2	2.2.4	2015	United States	North America	5	13	KL22(Very high)	OCL3(Good)	1	0	1	0	1	1	0	0	0	0	1
GCF_001669225	2	281	IC2	2.2	2.2.4	2014	United States	North America	5	13	KL22(Very high)	OCL3(Good)	1	0	1	0	1	1	0	0	0	0	1
GCF_001669255	2	281	IC2	2.2	2.2.4	2014	United States	North America	5	13	KL22(Very high)	OCL3(Good)	1	0	1	0	1	1	0	0	0	0	1
GCF_001669265	2	281	IC2	2.2	2.2.4	2014	United States	North America	5	13	KL22(Very high)	OCL3(Good)	1	0	1	0	1	1	0	0	0	0	1
GCF_001669295	2	281	IC2	2.2	2.2.4	2015	United States	North America	5	13	KL22(Very high)	OCL3(Good)	1	0	1	0	1	1	0	0	0	0	1
GCF_001669305	2	281	IC2	2.2	2.2.4	2014	United States	North America	6	15	KL22(Very high)	OCL3(Good)	1	0	0	0	1	1	1	0	0	0	1
GCF_001669355	2	208	IC2	2.4	2.4.2	2014	United States	North America	8	23	KL2(Very high)	OCL1(Very high)	1	1	1	0	1	1	1	0	0	0	1
GCF_001669365	2	281	IC2	2.2	2.2.4	2014	United States	North America	4	9	KL22(Very high)	OCL3(Low)	1	0	0	0	1	1	0	0	0	0	1
GCF_001669415	2	281	IC2	2.2	2.2.4	2015	United States	North America	6	15	KL22(Very high)	OCL3(Good)	1	0	1	0	1	1	1	0	0	0	1
GCF_001669425	2	281	IC2	2.2	2.2.4	2014	United States	North America	5	12	KL22(Very high)	OCL3(Good)	1	0	1	0	1	1	0	0	0	0	1
GCF_001669435	2	281	IC2	2.2	2.2.4	2015	United States	North America	5	13	KL22(Very high)	OCL3(Good)	1	0	1	0	1	1	0	0	0	0	1
GCF_001669455	2	281	IC2	2.2	2.2.4	2015	United States	North America	5	13	KL22(Very high)	OCL3(Good)	1	0	1	0	1	1	0	0	0	0	1
GCF_001669495	2	281	IC2	2.2	2.2.4	2014	United States	North America	5	13	KL22(Very high)	OCL3(Good)	1	0	1	0	0	1	0	0	0	0	1
GCF_001669505	2	208	IC2	2.4	2.4.12	2014	United States	North America	8	20	KL152(Very high)	OCL1(Very high)	1	1	1	0	1	1	1	0	0	0	1
GCF_001669525	2	281	IC2	2.2	2.2.4	2016	United States	North America	6	15	KL22(Very high)	OCL3(Good)	1	0	0	0	1	1	1	0	0	0	1
GCF_001669535	2	208	IC2	2.4	2.4.2	2014	United States	North America	7	18	KL2(Very high)	OCL1(Very high)	1	1	1	0	1	1	0	0	0	0	1
GCF_001669575	2	281	IC2	2.2	2.2.4	2014	United States	North America	5	13	KL22(Very high)	OCL3(Good)	1	0	1	0	1	1	0	0	0	0	1
GCF_001669595	2	281	IC2	2.2	2.2.4	2015	United States	North America	5	12	KL22(Very high)	OCL3(Good)	1	0	1	0	1	1	0	0	0	0	1
GCF_001669605	2	281	IC2	2.2	2.2.4	2015	United States	North America	5	12	KL22(Very high)	OCL3(Low)	1	0	1	0	1	0	1	0	0	0	1
GCF_001669635	2	281	IC2	2.2	2.2.4	2015	United States	North America	5	13	KL22(Good)	OCL3(Good)	1	0	1	0	1	1	0	0	0	0	1
GCF_001669645	2	281	IC2	2.2	2.2.4	2016	United States	North America	5	12	KL22(Very high)	OCL3(Good)	1	0	1	0	1	1	0	0	0	0	1
GCF_001669675	2	281	IC2	2.2	2.2.4	2014	United States	North America	5	11	KL22(Very high)	OCL3(Good)	1	0	1	0	1	1	0	0	0	0	1
GCF_001669695	2	281	IC2	2.2	2.2.4	2015	United States	North America	5	13	KL22(Very high)	OCL3(Good)	1	0	1	0	1	1	0	0	0	0	1
GCF_001669705	2	281	IC2	2.2	2.2.4	2014	United States	North America	5	13	KL22(Very high)	OCL3(Good)	1	0	1	0	1	1	0	0	0	0	1
GCF_001669735	2	938	IC2	2.5	2.5.6	2014	Malaysia	Asia	5	16	KL210(Good)	OCL1(Very high)	1	0	1	0	1	1	0	0	0	0	1
GCF_001672535	2	218	IC2	2.4	2.4.2	2014	Puerto Rico	North America	8	27	KL9(Very high)	OCL1(Very high)	1	1	1	0	1	1	1	0	0	0	1
GCF_001673795	2	281	IC2	2.2	2.2.4	2015	United States	North America	5	13	KL22(Very high)	OCL3(Good)	1	0	1	0	1	1	0	0	0	0	1
GCF_001673805	2	281	IC2	2.2	2.2.4	2014	United States	North America	5	13	KL22(Very high)	OCL3(Good)	1	0	1	0	1	1	0	0	0	0	1
GCF_001673815	2	281	IC2	2.2	2.2.4	2014	United States	North America	6	15	KL22(Very high)	OCL3(Good)	1	0	1	0	1	1	1	0	0	0	1
GCF_001673825	2	281	IC2	2.2	2.2.4	2014	United States	North America	5	13	KL22(Very high)	OCL3(Good)	1	0	1	0	1	1	0	0	0	0	1
GCF_001673875	2	281	IC2	2.2	2.2.4	2014	United States	North America	5	13	KL22(Very high)	OCL3(Good)	1	0	1	0	1	1	0	0	0	0	1
GCF_001673895	2	281	IC2	2.2	2.2.4	2015	United States	North America	6	15	KL22(Very high)	OCL3(Good)	1	0	1	0	1	1	1	0	0	0	1
GCF_001673905	2	281	IC2	2.2	2.2.4	2014	United States	North America	5	13	KL22(Very high)	OCL3(Good)	1	0	1	0	1	1	0	0	0	0	1
GCF_001673915	2	281	IC2	2.2	2.2.4	2014	United States	North America	5	13	KL22(Good)	OCL3(Good)	1	0	1	0	1	1	0	0	0	0	1
GCF_001673955	2	281	IC2	2.2	2.2.4	2015	United States	North America	5	12	KL22(Very high)	OCL3(Low)	1	0	1	0	1	0	1	0	0	0	1
GCF_001673975	2	281	IC2	2.2	2.2.4	2016	United States	North America	5	13	KL22(Very high)	OCL3(Good)	1	0	1	0	1	1	0	0	0	0	1
GCF_001673985	2	281	IC2	2.2	2.2.4	2014	United States	North America	5	13	KL22(Very high)	OCL3(Low)	1	0	1	0	1	1	0	0	0	0	1
GCF_001674015	2	281	IC2	2.2	2.2.4	2015	United States	North America	5	13	KL22(Very high)	OCL3(Good)	1	0	1	0	1	1	0	0	0	0	1
GCF_001674035	2	281	IC2	2.2	2.2.4	2016	United States	North America	5	13	KL22(Very high)	OCL3(Good)	1	0	1	0	1	1	0	0	0	0	1
GCF_001674045	2	281	IC2	2.2	2.2.4	2015	United States	North America	5	12	KL22(Very high)	OCL3(Low)	1	0	1	0	1	0	1	0	0	0	1
GCF_001674075	2	281	IC2	2.2	2.2.4	2015	United States	North America	5	13	KL22(Very high)	OCL3(Good)	1	0	1	0	1	1	0	0	0	0	1
GCF_001674085	2	281	IC2	2.2	2.2.4	2014	United States	North America	5	13	KL22(Very high)	OCL3(Good)	1	0	1	0	1	1	0	0	0	0	1
GCF_001674115	2	281	IC2	2.2	2.2.4	2014	United States	North America	5	13	KL22(Very high)	OCL3(Good)	1	0	1	0	0	1	0	0	0	0	1
GCF_001674135	2	281	IC2	2.2	2.2.4	2015	United States	North America	5	12	KL22(Very high)	OCL3(Good)	1	0	1	0	1	0	1	0	0	0	1
GCF_001674155	2	281	IC2	2.2	2.2.4	2015	United States	North America	3	8	KL22(Good)	OCL3(Good)	1	0	0	0	1	0	0	0	0	0	1
GCF_001674165	2	281	IC2	2.2	2.2.4	2014	United States	North America	5	13	KL22(Very high)	OCL3(Good)	1	0	1	0	1	1	0	0	0	0	1
GCF_001674185	250	1739				2015	United States	North America	2	4	KL155(Perfect)	OCL1(Very high)	1	0	0	0	0	0	0	0	0	0	0
GCF_001674215	2	281	IC2	2.2	2.2.4	2016	United States	North America	5	12	KL22(Very high)	OCL3(Good)	1	0	1	0	1	1	0	0	0	0	1
GCF_001674235	2	281	IC2	2.2	2.2.4	2014	United States	North America	5	13	KL22(Very high)	OCL3(Good)	1	0	1	0	1	1	0	0	0	0	1
GCF_001674245	2	281	IC2	2.2	2.2.4	2016	United States	North America	5	13	KL22(Very high)	OCL3(Good)	1	0	1	0	1	1	0	0	0	0	1
GCF_001674255	2	281	IC2	2.2	2.2.4	2014	United States	North America	5	13	KL22(Very high)	OCL3(Good)	1	0	1	0	1	1	0	0	0	0	1
GCF_001674295	2	281	IC2	2.2	2.2.4	2014	United States	North America	5	13	KL22(Very high)	OCL3(Good)	1	0	1	0	1	1	0	0	0	0	1
GCF_001674315	2	281	IC2	2.2	2.2.4	2015	United States	North America	5	13	KL22(Very high)	OCL3(Good)	1	0	1	0	1	1	0	0	0	0	1
GCF_001674325	2	281	IC2	2.2	2.2.4	2015	United States	North America	4	9	KL22(Very high)	OCL3(Good)	1	0	1	0	1	0	0	0	0	0	1
GCF_001674345	2	281	IC2	2.2	2.2.4	2014	United States	North America	5	13	KL22(Very high)	OCL3(Good)	1	0	1	0	1	1	0	0	0	0	1
GCF_001674365	2	281	IC2	2.2	2.2.4	2015	United States	North America	5	13	KL22(High)	OCL3(Good)	1	0	1	0	1	1	0	0	0	0	1
GCF_001674395	2	281	IC2	2.2	2.2.4	2014	United States	North America	5	13	KL22(Very high)	OCL3(Good)	1	0	1	0	1	1	0	0	0	0	1
GCF_001674415	2	281	IC2	2.2	2.2.4	2014	United States	North America	5	11	KL22(Good)	OCL3(Good)	1	0	1	0	1	1	0	0	0	0	1
GCF_001674425	2	281	IC2	2.2	2.2.4	2014	United States	North America	6	15	KL22(Very high)	OCL3(Good)	1	0	1	0	1	1	1	0	0	0	1
GCF_001674435	2	281	IC2	2.2	2.2.4	2014	United States	North America	5	13	KL22(Very high)	OCL3(Good)	1	0	1	0	1	1	0	0	0	0	1
GCF_001674475	2	281	IC2	2.2	2.2.4	2015	United States	North America	6	17	KL22(High)	OCL3(High)	1	1	1	0	1	1	0	0	0	0	1
GCF_001674485	632	281	IC2	2.2	2.2.4	2015	United States	North America	5	13	KL22(Very high)	OCL3(Good)	1	0	1	0	1	1	0	0	0	0	1
GCF_001674505	2	281	IC2	2.2	2.2.4	2015	United States	North America	6	16	KL22(Very high)	OCL3(High)	1	1	1	0	1	1	0	0	0	0	1
GCF_001674515	2	281	IC2	2.2	2.2.4	2016	United States	North America	5	13	KL22(Very high)	OCL3(None)	1	0	1	0	1	1	0	0	0	0	1
GCF_001674555	2	281	IC2	2.2	2.2.4	2014	United States	North America	6	14	KL22(Very high)	OCL3(Good)	1	0	1	0	1	1	1	0	0	0	1
GCF_001674575	2	281	IC2	2.2	2.2.4	2015	United States	North America	4	10	KL22(Very high)	OCL3(Good)	1	0	1	0	1	0	0	0	0	0	1
GCF_001674585	2	281	IC2	2.2	2.2.4	2014	United States	North America	5	13	KL22(Very high)	OCL3(Good)	1	0	1	0	0	1	0	0	0	0	1
GCF_001674605	2	281	IC2	2.2	2.2.4	2014	United States	North America	5	13	KL22(Very high)	OCL3(Good)	1	0	1	0	0	1	0	0	0	0	1
GCF_001674635	2	281	IC2	2.2	2.2.4	2014	United States	North America	5	13	KL22(Very high)	OCL3(Good)	1	0	1	0	0	1	0	0	0	0	1
GCF_001674655	2	281	IC2	2.2	2.2.4	2014	United States	North America	5	13	KL22(Good)	OCL3(Good)	1	0	1	0	1	1	0	0	0	0	1
GCF_001674665	2	208	IC2	2.4	2.4.2	2014	United States	North America	8	23	KL2(Very high)	OCL1(Very high)	1	1	1	0	1	1	1	0	0	0	1
GCF_001674695	1079	1483				2014	United States	North America	3	7	KL107(Very high)	OCL3(Very high)	1	0	1	0	1	0	0	0	0	0	0
GCF_001674705	2	281	IC2	2.2	2.2.4	2015	United States	North America	5	13	KL22(Good)	OCL3(Good)	1	0	1	0	1	1	0	0	0	0	1
GCF_001674735	2	281	IC2	2.2	2.2.4	2015	United States	North America	5	13	KL22(Good)	OCL3(Good)	1	0	1	0	1	1	0	0	0	0	1
GCF_001674755	2	281	IC2	2.2	2.2.4	2015	United States	North America	6	15	KL22(Very high)	OCL3(Good)	1	0	1	0	1	1	1	0	0	0	1
GCF_001674765	2	281	IC2	2.2	2.2.4	2016	United States	North America	5	13	KL22(Very high)	OCL3(Good)	1	0	1	0	1	1	0	0	0	0	1
GCF_001674785	2	281	IC2	2.2	2.2.4	2016	United States	North America	5	13	KL22(Very high)	OCL3(Good)	1	0	1	0	1	1	0	0	0	0	1
GCF_001674805	2	281	IC2	2.2	2.2.4	2016	United States	North America	6	15	KL22(Very high)	OCL3(Good)	1	0	1	0	1	1	1	0	0	0	1
GCF_001674835	2	281	IC2	2.2	2.2.4	2015	United States	North America	5	12	KL22(Very high)	OCL3(Good)	1	0	1	0	1	1	0	0	0	0	1
GCF_001674845	2	281	IC2	2.2	2.2.4	2015	United States	North America	5	13	KL22(Very high)	OCL3(Good)	1	0	1	0	1	1	0	0	0	0	1
GCF_001674865	2	281	IC2	2.2	2.2.4	2015	United States	North America	6	15	KL22(Good)	OCL3(Good)	1	0	1	0	1	1	1	0	0	0	1
GCF_001674885	2	281	IC2	2.2	2.2.4	2016	United States	North America	5	13	KL22(Very high)	OCL3(Good)	1	0	1	0	1	1	0	0	0	0	1
GCF_001674915	2	281	IC2	2.2	2.2.4	2014	United States	North America	5	13	KL22(Good)	OCL3(Good)	1	0	1	0	1	1	0	0	0	0	1
GCF_001675265	111	1167				2002	Russia	Europe	5	12	KL19(High)	OCL1(High)	1	0	1	0	0	0	0	0	0	0	0
GCF_001680105	2	191	IC2	2.4	2.4.10	2013	China	Asia	7	18	KL72(Very high)	OCL1(Very high)	1	0	1	0	1	1	1	0	0	0	1
GCF_001680115	2	191	IC2	2.4	2.4.10	2013	China	Asia	7	18	KL72(Very high)	OCL1(Very high)	1	0	1	0	1	1	1	0	0	0	1
GCF_001680185	2	208	IC2	2.4	2.4.13	2013	China	Asia	7	19	KL7(Very high)	OCL1(Very high)	1	1	1	0	1	1	0	0	0	0	1
GCF_001680195	2	208	IC2	2.4	2.4.13	2013	China	Asia	7	19	KL7(Very high)	OCL1(Very high)	1	1	1	0	1	1	0	0	0	0	1
GCF_001680215	2	191	IC2	2.4	2.4.13	2014	China	Asia	7	18	KL72(Very high)	OCL1(Very high)	1	0	1	0	1	1	1	0	0	0	1
GCF_001680225	2	191	IC2	2.4	2.4.10	2014	China	Asia	7	19	KL9(Good)	OCL1(Very high)	1	0	1	0	1	1	1	0	0	0	1
GCF_001680265	2	191	IC2	2.4	2.4.13	2013	China	Asia	7	18	KL72(Good)	OCL1(Very high)	1	0	1	0	1	1	1	0	0	0	1
GCF_001680285	2	191	IC2	2.4	2.4.13	2013	China	Asia	7	18	KL72(Very high)	OCL1(Very high)	1	0	1	0	1	1	1	0	0	0	1
GCF_001680295	2	191	IC2	2.4	2.4.10	2014	China	Asia	7	19	KL9(Good)	OCL1(Very high)	1	0	1	0	1	1	1	0	0	0	1
GCF_001680305	2	208	IC2	2.4	2.4.2	2014	China	Asia	8	22	KL2(Very high)	OCL1(Very high)	1	1	1	0	1	1	1	0	0	0	1
GCF_001680345	2	195	IC2	2.5	2.5.6	2014	China	Asia	6	18	KL3(Very high)	OCL1(Very high)	1	1	1	0	1	0	1	0	0	0	1
GCF_001680365	2	195	IC2	2.5	2.5.6	2014	China	Asia	7	19	KL3(Very high)	OCL1(Very high)	1	1	1	0	1	1	1	0	0	0	1
GCF_001680375	2	195	IC2	2.5	2.5.6	2014	China	Asia	7	19	KL3(Very high)	OCL1(Very high)	1	1	1	0	1	1	1	0	0	0	1
GCF_001680395	2	195	IC2	2.5	2.5.6	2014	China	Asia	7	19	KL3(Very high)	OCL1(Very high)	1	1	1	0	1	1	1	0	0	0	1
GCF_001680425	2	195	IC2	2.5	2.5.6	2014	China	Asia	7	19	KL3(Very high)	OCL1(Very high)	1	1	1	0	1	1	1	0	0	0	1
GCF_001680445	2	195	IC2	2.5	2.5.6	2014	China	Asia	7	19	KL3(Very high)	OCL1(Very high)	1	1	1	0	1	1	1	0	0	0	1
GCF_001680475	2	195	IC2	2.5	2.5.6	2014	China	Asia	7	19	KL3(Very high)	OCL1(Very high)	1	1	1	0	1	1	1	0	0	0	1
GCF_001693095	388	836				2013	Germany	Europe	3	5	KL11(Very high)	OCL8(Very high)	1	0	1	0	0	0	0	0	0	0	0
GCF_001693105	New Pasteur ST	1458				2013	Poland	Europe	3	6	KL79(Perfect)	OCL1(Very high)	1	0	1	0	0	0	0	0	0	0	0
GCF_001693115	23	642	IC8			2012	Germany	Europe	3	5	KL8(Very high)	OCL2(Perfect)	1	0	1	0	0	0	0	0	0	0	0
GCF_001693125	New Pasteur ST	1459				2013	Poland	Europe	3	5	KL121(Perfect)	OCL1(Very high)	1	0	1	0	0	0	0	0	0	0	0
GCF_001693175	New Pasteur ST	1459				2014	Poland	Europe	3	5	KL121(Perfect)	OCL1(Very high)	1	0	1	0	0	0	0	0	0	0	0
GCF_001693185	512	952				2014	Poland	Europe	3	5	KL115(Good)	OCL1(Very high)	1	0	1	0	0	0	0	0	0	0	0
GCF_001693195	309	1456				2014	Poland	Europe	3	5	KL58(Good)	OCL1(Very high)	1	0	1	0	0	0	0	0	0	0	0
GCF_001693205	80	1457				2014	Poland	Europe	3	5	KL126(Perfect)	OCL3(Very high)	1	0	1	0	0	0	0	0	0	0	0
GCF_001612015	3	928	IC3			2006	United States	North America	6	11	KL18(Good)	OCL1(Very high)	1	1	1	0	0	1	0	0	0	0	1
GCF_001612025	48	New Oxford ST				2003	United States	North America	2	4	KL19(Very high)	OCL1(Very high)	1	0	0	0	0	0	0	0	0	0	0
GCF_001704675	10	585	IC8			2011	Germany	Europe	8	15	KL108(Very high)	OCL2(Very high)	1	1	1	0	0	1	0	1	0	0	1
GCF_001704685	2	1421	IC2	2.5	2.5.8	2014	Germany	Europe	8	20	KL3(Very high)	OCL1(Very high)	1	1	1	0	1	1	1	0	0	0	1
GCF_001704695	1	231	IC1	1.4	1.4.8	2011	Germany	Europe	7	16	KL1(Good)	OCL1(Perfect)	1	1	1	0	0	1	0	0	0	0	1
GCF_001704705	10	585	IC8			2011	Germany	Europe	8	15	KL108(Good)	OCL2(Very high)	1	1	1	0	0	1	0	1	0	0	1
GCF_001707985	2	218	IC2	2.2	2.2.5	2010	Spain	Europe	5	13	KL42(Very high)	OCL1(Good)	1	1	1	0	1	0	0	0	0	0	1
GCF_001708025	2	218	IC2	2.2	2.2.5	2005	Spain	Europe	6	14	KL42(Very high)	OCL1(Good)	1	1	1	0	1	1	0	0	0	0	1
GCF_001721365	437	112				2014	China	Asia	4	6	KL3(Perfect)	OCL2(Very high)	1	0	1	0	0	1	0	0	0	0	0
GCF_001721375	437	112				2014	China	Asia	4	6	KL3(Perfect)	OCL2(Very high)	1	0	1	0	0	1	0	0	0	0	0
GCF_001721385	437	112				2014	China	Asia	4	7	KL3(Perfect)	OCL2(Very high)	1	0	1	0	0	1	0	0	0	0	0
GCF_001721425	437	112				2014	China	Asia	4	6	KL3(Perfect)	OCL2(Very high)	1	0	1	0	0	1	0	0	0	0	0
GCF_001721445	437	112				2014	China	Asia	4	6	KL3(Perfect)	OCL2(Very high)	1	0	1	0	0	1	0	0	0	0	0
GCF_001721455	437	112				2014	China	Asia	4	6	KL3(Perfect)	OCL2(Very high)	1	0	1	0	0	1	0	0	0	0	0
GCF_001721465	437	112				2014	China	Asia	4	6	KL3(Perfect)	OCL2(Very high)	1	0	1	0	0	1	0	0	0	0	0
GCF_001721475	437	112				2014	China	Asia	4	6	KL3(Perfect)	OCL2(Very high)	1	0	1	0	0	1	0	0	0	0	0
GCF_001721705	1546	2205				2010	Australia	Oceania	3	5	KL137(Perfect)	OCL12(Very high)	1	0	1	0	0	0	0	0	0	0	0
GCF_001756815	107	1552				2003	Brazil	South America	6	12	KL231(None)	OCL13(None)	1	0	1	0	0	1	0	0	0	0	0
GCF_001758065	32	472				2002	Brazil	South America	4	10	KL99(None)	OCL6(Very high)	1	0	1	0	0	0	0	0	0	0	0
GCF_001758085	15	New Oxford ST	IC4			2006	Brazil	South America	4	8	KL9(None)	OCL7(None)	1	0	1	0	0	0	0	0	0	0	1
GCF_001758125	107	1552				2004	Brazil	South America	4	10	KL231(None)	OCL13(None)	1	0	1	0	0	0	0	0	0	0	0
GCF_001758135	79	New Oxford ST	IC5			2011	Brazil	South America	8	17	KL9(None)	OCL11(Good)	1	0	1	0	1	0	1	1	0	0	1
GCF_001758165	107	1552				2004	Brazil	South America	6	14	KL43(None)	OCL13(None)	1	0	1	0	0	1	0	0	0	0	0
GCF_001806345	2	451	IC2	2.5	2.5.6	2015	South Korea	Asia	5	15	KL6(Very high)	OCL1(High)	1	1	1	0	1	0	0	0	0	0	1
GCF_001806365	2	369	IC2	2.4	2.4.10	2015	South Korea	Asia	7	16	KL49(Very high)	OCL1(Very high)	1	0	1	0	1	1	1	0	0	0	1
GCF_001806385	2	451	IC2	2.5	2.5.6	2015	South Korea	Asia	7	20	KL6(Very high)	OCL1(Very high)	1	1	1	0	1	1	1	0	0	0	1
GCF_001806405	2	191	IC2	2.4	2.4.10	2015	South Korea	Asia	7	16	KL72(Very high)	OCL1(Very high)	1	0	1	0	1	1	1	0	0	0	1
GCF_001806425	2	369	IC2	2.4	2.4.10	2015	South Korea	Asia	6	14	KL49(High)	OCL1(Very high)	1	0	1	0	1	1	0	0	0	0	1
GCF_001806445	2	369	IC2	2.4	2.4.10	2015	South Korea	Asia	6	14	KL49(High)	OCL1(Very high)	1	0	1	0	1	1	0	0	0	0	1
GCF_001806465	2	191	IC2	2.4	2.4.10	2015	South Korea	Asia	7	16	KL72(Very high)	OCL1(Very high)	1	0	1	0	1	1	1	0	0	0	1
GCF_001806485	2	208	IC2	2.4	2.4.2	2015	South Korea	Asia	7	16	KL115(Perfect)	OCL1(Very high)	1	0	1	0	0	1	1	0	0	0	1
GCF_001855175	2	191	IC2	2.4	2.4.10	2010	China	Asia	7	17	KL72(Very high)	OCL1(Very high)	1	0	1	0	1	1	1	0	0	0	1
GCF_001861375	New Pasteur ST	195	IC2	2.5	2.5.6	2014	China	Asia	6	17	KL3(High)	OCL1(Very high)	1	1	1	0	1	0	1	0	0	0	1
GCF_001861385	2	208	IC2	2.4	2.4.13	2013	China	Asia	6	17	KL7(Very high)	OCL1(Very high)	1	1	1	0	1	1	0	0	0	0	1
GCF_001861395	New Pasteur ST	New Oxford ST				2014	China	Asia	6	10	KL28(Very high)	OCL1(Very high)	1	1	1	0	0	1	0	0	0	0	0
GCF_001861435	2	208	IC2	2.4	2.4.13	2014	China	Asia	6	17	KL7(Very high)	OCL1(Very high)	1	1	1	0	1	1	0	0	0	0	1
GCF_001861465	2	195	IC2	2.5	2.5.6	2014	China	Asia	6	18	KL3(Very high)	OCL1(Very high)	1	1	1	0	1	0	1	0	0	0	1
GCF_001861475	2	195	IC2	2.5	2.5.6	2014	China	Asia	7	19	KL3(Very high)	OCL1(Very high)	1	1	1	0	1	1	1	0	0	0	1
GCF_001861515	2	New Oxford ST	IC2	2.5	2.5.6	2014	China	Asia	5	15	KL3(Very high)	OCL1(Very high)	1	0	1	0	1	0	1	0	0	0	1
GCF_001861535	2	195	IC2	2.5	2.5.6	2014	China	Asia	7	17	KL3(Very high)	OCL1(Very high)	1	1	1	0	1	1	1	0	0	0	1
GCF_001861545	2	208	IC2	2.4	2.4.2	2013	China	Asia	8	21	KL2(Very high)	OCL1(Very high)	1	1	1	0	1	1	1	0	0	0	1
GCF_001861585	2	195	IC2	2.5	2.5.6	2014	China	Asia	6	16	KL3(Very high)	OCL1(Very high)	1	1	1	0	1	0	1	0	0	0	1
GCF_001861615	2	191	IC2	2.4	2.4.13	2014	China	Asia	5	10	KL72(Very high)	OCL1(Very high)	1	0	1	0	1	1	0	0	0	0	1
GCF_001861655	2	191	IC2	2.4	2.4.13	2014	China	Asia	7	18	KL72(Very high)	OCL1(Very high)	1	0	1	0	1	1	1	0	0	0	1
GCF_001861665	2	191	IC2	2.4	2.4.10	2012	China	Asia	5	11	KL72(Very high)	OCL1(Very high)	1	0	1	0	1	1	0	0	0	0	1
GCF_001861695	2	195	IC2	2.5	2.5.6	2013	China	Asia	7	17	KL3(Very high)	OCL1(Very high)	1	1	1	0	1	1	1	0	0	0	1
GCF_001861735	2	784	IC2	2.4	2.4.6	2014	China	Asia	6	17	KL14(Very high)	OCL1(Very high)	1	1	1	0	1	1	0	0	0	0	1
GCF_001861745	2	368	IC2	2.3	2.3.3	2013	China	Asia	7	16	KL34(Perfect)	OCL1(Very high)	1	1	1	0	1	1	1	0	0	0	1
GCF_001861775	2	195	IC2	2.5	2.5.6	2014	China	Asia	6	18	KL3(Very high)	OCL1(Very high)	1	1	1	0	1	0	1	0	0	0	1
GCF_001861785	2	208	IC2	2.4	2.4.13	2013	China	Asia	6	18	KL2(Very high)	OCL1(Very high)	1	1	1	0	1	1	0	0	0	0	1
GCF_001861835	2	195	IC2	2.5	2.5.6	2014	China	Asia	6	18	KL3(Very high)	OCL1(Very high)	1	1	1	0	1	0	1	0	0	0	1
GCF_001861855	2	195	IC2	2.5	2.5.6	2013	China	Asia	6	16	KL3(Very high)	OCL1(Very high)	1	1	1	0	1	0	1	0	0	0	1
GCF_001861865	2	208	IC2	2.4	2.4.2	2013	China	Asia	8	22	KL2(Very high)	OCL1(Very high)	1	1	1	0	1	1	1	0	0	0	1
GCF_001861895	2	195	IC2	2.5	2.5.6	2013	China	Asia	6	15	KL3(Very high)	OCL1(Very high)	1	1	0	0	1	1	1	0	0	0	1
GCF_001861905	2	195	IC2	2.5	2.5.6	2014	China	Asia	7	18	KL3(Very high)	OCL1(Very high)	1	1	1	0	1	1	1	0	0	0	1
GCF_001861935	10	447	IC8			2012	China	Asia	3	7	KL49(Very high)	OCL2(Very high)	1	0	0	0	0	0	0	0	0	0	1
GCF_001861955	10	447	IC8			2013	China	Asia	3	7	KL49(Very high)	OCL2(Very high)	1	0	0	0	0	0	0	0	0	0	1
GCF_001861975	2	208	IC2	2.4	2.4.13	2012	China	Asia	8	23	KL2(Very high)	OCL1(Very high)	1	1	1	0	1	1	1	0	0	0	1
GCF_001861995	2	195	IC2	2.5	2.5.6	2014	China	Asia	5	13	KL3(High)	OCL1(Very high)	1	1	1	0	1	0	0	0	0	0	1
GCF_001862005	New Pasteur ST	New Oxford ST				2013	China	Asia	4	8	KL28(Very high)	OCL1(Very high)	1	0	1	0	0	0	0	0	0	0	0
GCF_001862035	2	195	IC2	2.5	2.5.6	2014	China	Asia	7	19	KL3(Very high)	OCL1(Very high)	1	1	1	0	1	1	1	0	0	0	1
GCF_001862055	2	195	IC2	2.5	2.5.6	2014	China	Asia	7	17	KL3(High)	OCL1(Very high)	1	1	1	0	1	1	1	0	0	0	1
GCF_001862065	2	191	IC2	2.4	2.4.13	2012	China	Asia	7	19	KL72(Very high)	OCL1(Very high)	1	0	1	0	1	1	1	0	0	0	1
GCF_001862075	2	New Oxford ST	IC2	2.5	2.5.6	2012	China	Asia	8	23	KL3(Good)	OCL1(Very high)	1	1	1	0	1	1	1	0	0	0	1
GCF_001862105	2	191	IC2	2.4	2.4.13	2013	China	Asia	7	17	KL72(Very high)	OCL1(Very high)	1	0	1	0	1	1	1	0	0	0	1
GCF_001862135	New Pasteur ST	191	IC2	2.4	2.4.13	2013	China	Asia	7	18	KL72(Very high)	OCL1(Very high)	1	0	1	0	1	1	1	0	0	0	1
GCF_001862175	2	New Oxford ST	IC2	2.4	2.4.6	2014	China	Asia	6	15	KL92(None)	OCL1(Very high)	1	1	1	0	1	1	0	0	0	0	1
GCF_001862215	2	195	IC2	2.5	2.5.6	2014	China	Asia	7	19	KL3(Very high)	OCL1(Very high)	1	1	1	0	1	1	1	0	0	0	1
GCF_001862225	2	784	IC2	2.4	2.4.6	2014	China	Asia	6	17	KL14(Very high)	OCL1(Very high)	1	1	1	0	1	1	0	0	0	0	1
GCF_001862235	2	195	IC2	2.5	2.5.6	2014	China	Asia	7	19	KL3(Very high)	OCL1(Very high)	1	1	1	0	1	1	1	0	0	0	1
GCF_001862265	2	784	IC2	2.4	2.4.6	2013	China	Asia	6	17	KL14(Very high)	OCL1(Very high)	1	1	1	0	1	1	0	0	0	0	1
GCF_001862295	2	784	IC2	2.4	2.4.6	2013	China	Asia	6	17	KL14(Very high)	OCL1(Very high)	1	1	1	0	1	1	0	0	0	0	1
GCF_001862305	2	New Oxford ST	IC2	2.4	2.4.6	2014	China	Asia	6	16	KL92(None)	None(None)	1	1	1	0	1	1	0	0	0	0	1
GCF_001862335	46	462				2014	China	Asia	6	10	KL28(Very high)	OCL1(Very high)	1	1	1	0	0	1	0	0	0	0	0
GCF_001862345	2	195	IC2	2.5	2.5.6	2014	China	Asia	6	16	KL3(Very high)	OCL1(Very high)	1	1	1	0	1	0	1	0	0	0	1
GCF_001862375	2	195	IC2	2.5	2.5.6	2014	China	Asia	7	17	KL3(High)	OCL1(Very high)	1	1	1	0	1	1	1	0	0	0	1
GCF_001862385	880	208	IC2	2.3	2.3.2	2013	China	Asia	6	17	KL2(Very high)	OCL1(Very high)	1	1	1	0	1	1	0	0	0	0	1
GCF_001862395	2	191	IC2	2.4	2.4.13	2013	China	Asia	7	19	KL72(Very high)	OCL1(Very high)	1	0	1	0	1	1	1	0	0	0	1
GCF_001862425	2	195	IC2	2.5	2.5.6	2013	China	Asia	7	19	KL3(Very high)	OCL1(Very high)	1	1	1	0	1	1	1	0	0	0	1
GCF_001862455	2	195	IC2	2.5	2.5.6	2013	China	Asia	7	18	KL3(Very high)	OCL1(Very high)	1	1	1	0	1	1	1	0	0	0	1
GCF_001862475	2	195	IC2	2.5	2.5.6	2013	China	Asia	7	19	KL3(High)	OCL1(Very high)	1	1	1	0	1	1	1	0	0	0	1
GCF_001862485	2	195	IC2	2.5	2.5.6	2015	China	Asia	7	17	KL3(Very high)	OCL1(Very high)	1	1	1	0	1	1	1	0	0	0	1
GCF_001862505	2	195	IC2	2.5	2.5.6	2014	China	Asia	7	19	KL3(Very high)	OCL1(Very high)	1	1	1	0	1	1	1	0	0	0	1
GCF_001862535	2	547	IC2	2.5	2.5.6	2013	China	Asia	7	20	KL14(Very high)	OCL1(Very high)	1	1	1	0	1	1	1	0	0	0	1
GCF_001862555	2	208	IC2	2.4	2.4.13	2013	China	Asia	6	17	KL2(Very high)	OCL1(Very high)	1	1	1	0	1	1	0	0	0	0	1
GCF_001862565	2	195	IC2	2.5	2.5.6	2012	China	Asia	7	17	KL3(Very high)	OCL1(Very high)	1	1	1	0	1	1	1	0	0	0	1
GCF_001862585	New Pasteur ST	195	IC2	2.5	2.5.6	2013	China	Asia	7	16	KL3(Very high)	OCL1(Very high)	1	1	1	0	1	1	1	0	0	0	1
GCF_001862615	2	195	IC2	2.5	2.5.6	2014	China	Asia	6	19	KL3(Very high)	OCL1(Very high)	1	1	1	0	1	0	1	0	0	0	1
GCF_001862645	2	195	IC2	2.5	2.5.6	2011	China	Asia	7	17	KL3(Very high)	OCL1(Very high)	1	1	1	0	1	1	1	0	0	0	1
GCF_001862665	2	191	IC2	2.4	2.4.13	2014	China	Asia	5	10	KL72(Very high)	OCL1(Very high)	1	0	1	0	1	1	0	0	0	0	1
GCF_001862715	2	195	IC2	2.5	2.5.6	2014	China	Asia	7	17	KL3(Very high)	OCL1(Very high)	1	1	1	0	1	1	1	0	0	0	1
GCF_001862725	338	New Oxford ST				2014	China	Asia	3	5	KL139(Very high)	OCL14(Very high)	1	0	1	0	0	0	0	0	0	0	0
GCF_001862735	2	191	IC2	2.4	2.4.13	2014	China	Asia	7	19	KL72(Very high)	OCL1(Very high)	1	0	1	0	1	1	1	0	0	0	1
GCF_001862775	2	191	IC2	2.4	2.4.13	2014	China	Asia	7	19	KL72(Very high)	OCL1(Very high)	1	0	1	0	1	1	1	0	0	0	1
GCF_001862795	23	642	IC8			2014	China	Asia	6	11	KL8(Very high)	OCL2(Good)	1	1	1	0	0	1	0	0	0	0	1
GCF_001862805	New Pasteur ST	New Oxford ST	IC2	2.4	2.4.6	2013	China	Asia	6	15	KL14(Very high)	OCL1(Very high)	1	1	1	0	1	1	0	0	0	0	1
GCF_001862825	2	191	IC2	2.4	2.4.10	2012	China	Asia	6	18	KL72(Very high)	OCL1(Very high)	1	0	1	0	1	1	1	0	0	0	1
GCF_001862855	2	195	IC2	2.5	2.5.6	2013	China	Asia	7	17	KL3(Very high)	OCL1(Very high)	1	1	1	0	1	1	1	0	0	0	1
GCF_001862875	2	195	IC2	2.5	2.5.6	2014	China	Asia	5	13	KL3(Very high)	OCL1(Very high)	1	1	1	0	1	0	0	0	0	0	1
GCF_001862885	2	195	IC2	2.5	2.5.6	2014	China	Asia	5	13	KL3(Good)	OCL1(Very high)	1	1	1	0	1	0	0	0	0	0	1
GCF_001862895	2	195	IC2	2.5	2.5.6	2013	China	Asia	7	18	KL3(Very high)	OCL1(Very high)	1	1	1	0	1	1	1	0	0	0	1
GCF_001862955	2	195	IC2	2.5	2.5.6	2014	China	Asia	5	16	KL3(High)	OCL1(Very high)	1	1	1	0	1	0	0	0	0	0	1
GCF_001862975	2	195	IC2	2.5	2.5.6	2014	China	Asia	7	18	KL3(Very high)	OCL1(Very high)	1	1	1	0	1	1	1	0	0	0	1
GCF_001862985	2	784	IC2	2.4	2.4.6	2014	China	Asia	6	17	KL14(Very high)	OCL1(Very high)	1	1	1	0	1	1	0	0	0	0	1
GCF_001863015	2	195	IC2	2.5	2.5.6	2013	China	Asia	6	16	KL3(Very high)	OCL1(Very high)	1	1	1	0	1	0	1	0	0	0	1
GCF_001863035	2	784	IC2	2.4	2.4.6	2014	China	Asia	6	17	KL14(Very high)	OCL1(Very high)	1	1	1	0	1	1	0	0	0	0	1
GCF_001863055	2	547	IC2	2.5	2.5.6	2015	China	Asia	5	12	KL14(Very high)	OCL1(Very high)	1	1	1	0	1	0	0	0	0	0	1
GCF_001863065	2	208	IC2	2.4	2.4.13	2014	China	Asia	6	15	KL2(Very high)	OCL1(Very high)	1	1	1	0	1	1	0	0	0	0	1
GCF_001863085	2	195	IC2	2.5	2.5.6	2014	China	Asia	7	19	KL3(High)	OCL1(Very high)	1	1	1	0	1	1	1	0	0	0	1
GCF_001863115	2	191	IC2	2.4	2.4.10	2012	China	Asia	7	19	KL72(Very high)	OCL1(Very high)	1	0	1	0	1	1	1	0	0	0	1
GCF_001863135	2	451	IC2	2.4	2.4.6	2012	China	Asia	8	22	KL138(Good)	OCL1(Very high)	1	1	1	0	1	1	1	0	0	0	1
GCF_001863145	2	540	IC2	2.4	2.4.10	2014	China	Asia	5	11	KL44(Good)	OCL1(Very high)	1	0	1	0	1	1	0	0	0	0	1
GCF_001863165	2	540	IC2	2.4	2.4.10	2015	China	Asia	7	19	KL44(Good)	OCL1(Very high)	1	0	1	0	1	1	1	0	0	0	1
GCF_001863205	2	New Oxford ST	IC2	2.5	2.5.6	2014	China	Asia	6	16	KL3(Very high)	OCL1(Very high)	1	1	1	0	1	0	1	0	0	0	1
GCF_001863225	2	208	IC2	2.4	2.4.13	2014	China	Asia	8	23	KL2(Very high)	OCL1(Very high)	1	1	1	0	1	1	1	0	0	0	1
GCF_001863275	New Pasteur ST	191	IC2	2.4	2.4.13	2013	China	Asia	5	11	KL72(Very high)	OCL1(Very high)	1	0	1	0	1	1	0	0	0	0	1
GCF_001863295	2	195	IC2	2.5	2.5.6	2014	China	Asia	7	17	KL3(Very high)	None(None)	1	1	1	0	1	1	1	0	0	0	1
GCF_001863315	2	369	IC2	2.4	2.4.13	2012	China	Asia	6	18	KL9(Very high)	OCL1(Very high)	1	1	1	0	1	1	0	0	0	0	1
GCF_001863335	2	208	IC2	2.4	2.4.13	2014	China	Asia	8	21	KL7(Very high)	OCL1(Very high)	1	1	1	0	1	1	1	0	0	0	1
GCF_001863345	2	191	IC2	2.4	2.4.13	2014	China	Asia	5	10	KL72(Very high)	OCL1(Very high)	1	0	1	0	1	1	0	0	0	0	1
GCF_001863395	2	191	IC2	2.4	2.4.13	2014	China	Asia	5	10	KL72(Very high)	OCL1(Very high)	1	0	1	0	1	1	0	0	0	0	1
GCF_001863405	2	208	IC2	2.4	2.4.13	2014	China	Asia	7	17	KL7(Very high)	OCL1(Very high)	1	1	1	0	1	1	1	0	0	0	1
GCF_001863415	46	462				2014	China	Asia	5	10	KL28(Very high)	OCL1(Very high)	1	0	1	0	0	0	1	0	0	0	0
GCF_001863455	2	195	IC2	2.5	2.5.6	2014	China	Asia	6	18	KL3(High)	OCL1(Very high)	1	1	1	0	1	0	1	0	0	0	1
GCF_001863465	2	547	IC2	2.5	2.5.6	2014	China	Asia	7	17	KL14(Very high)	OCL1(Very high)	1	1	1	0	1	1	1	0	0	0	1
GCF_001863475	2	195	IC2	2.5	2.5.6	2014	China	Asia	7	18	KL3(High)	OCL1(Very high)	1	1	1	0	1	1	1	0	0	0	1
GCF_001863485	46	462				2014	China	Asia	4	8	KL28(Very high)	OCL1(Very high)	1	0	1	0	0	0	0	0	0	0	0
GCF_001863535	2	195	IC2	2.5	2.5.6	2014	China	Asia	7	17	KL3(High)	OCL1(Very high)	1	1	1	0	1	1	1	0	0	0	1
GCF_001863545	2	208	IC2	2.4	2.4.13	2014	China	Asia	8	21	KL2(Very high)	OCL1(Very high)	1	1	1	0	1	1	1	0	0	0	1
GCF_001863555	2	195	IC2	2.5	2.5.6	2014	China	Asia	7	19	KL3(High)	OCL1(Very high)	1	1	1	0	1	1	1	0	0	0	1
GCF_001863575	2	195	IC2	2.5	2.5.6	2014	China	Asia	7	17	KL3(Very high)	OCL1(Very high)	1	1	1	0	1	1	1	0	0	0	1
GCF_001863615	2	208	IC2	2.4	2.4.13	2014	China	Asia	8	23	KL7(Very high)	OCL1(Very high)	1	1	1	0	1	1	1	0	0	0	1
GCF_001863625	2	195	IC2	2.5	2.5.6	2014	China	Asia	7	17	KL3(Very high)	OCL1(Very high)	1	1	1	0	1	1	1	0	0	0	1
GCF_001863665	2	195	IC2	2.5	2.5.6	2014	China	Asia	6	18	KL3(Very high)	OCL1(Very high)	1	1	1	0	1	0	1	0	0	0	1
GCF_001863695	2	195	IC2	2.5	2.5.6	2014	China	Asia	7	17	KL3(Very high)	OCL1(Very high)	1	1	1	0	1	1	1	0	0	0	1
GCF_001863705	New Pasteur ST	1342				2014	China	Asia	3	5	KL117(Good)	OCL5(Very high)	1	0	1	0	0	0	0	0	0	0	0
GCF_001863725	46	462				2014	China	Asia	4	8	KL28(Very high)	OCL1(Very high)	1	0	1	0	0	0	0	0	0	0	0
GCF_001863745	46	1333				2014	China	Asia	4	8	KL77(Very high)	OCL1(Very high)	1	0	1	0	0	0	0	0	0	0	0
GCF_001863775	2	191	IC2	2.4	2.4.13	2014	China	Asia	7	19	KL72(Very high)	OCL1(Very high)	1	0	1	0	1	1	1	0	0	0	1
GCF_001863785	878	1345				2014	China	Asia	5	10	KL146(Very high)	OCL12(Very high)	1	1	0	0	0	1	0	0	0	0	0
GCF_001863815	2	784	IC2	2.4	2.4.6	2014	China	Asia	6	17	KL14(Very high)	OCL1(Very high)	1	1	1	0	1	1	0	0	0	0	1
GCF_001863835	46	1333				2015	China	Asia	4	8	KL77(Very high)	OCL1(Very high)	1	0	1	0	0	0	0	0	0	0	0
GCF_001863855	2	208	IC2	2.4	2.4.2	2015	China	Asia	8	21	KL2(Very high)	OCL1(Very high)	1	1	1	0	1	1	1	0	0	0	1
GCF_001863865	2	208	IC2	2.4	2.4.2	2015	China	Asia	5	14	KL2(Very high)	OCL1(Very high)	1	1	1	0	1	0	0	0	0	0	1
GCF_001863875	2	191	IC2	2.4	2.4.13	2014	China	Asia	7	19	KL72(Very high)	OCL1(Very high)	1	0	1	0	1	1	1	0	0	0	1
GCF_001863905	2	195	IC2	2.5	2.5.6	2012	China	Asia	7	17	KL3(Very high)	OCL1(Very high)	1	1	1	0	1	1	1	0	0	0	1
GCF_001863935	2	195	IC2	2.5	2.5.6	2014	China	Asia	7	19	KL3(Very high)	OCL1(Very high)	1	1	1	0	1	1	1	0	0	0	1
GCF_001863955	2	208	IC2	2.4	2.4.2	2014	China	Asia	8	20	KL2(Very high)	OCL1(Very high)	1	1	1	0	1	1	1	0	0	0	1
GCF_001863965	2	784	IC2	2.4	2.4.6	2014	China	Asia	6	17	KL14(Good)	OCL1(Very high)	1	1	1	0	1	1	0	0	0	0	1
GCF_001863975	New Pasteur ST	784	IC2	2.4	2.4.6	2014	China	Asia	6	17	KL14(Very high)	OCL1(Very high)	1	1	1	0	1	1	0	0	0	0	1
GCF_001864015	2	208	IC2	2.4	2.4.13	2014	China	Asia	5	13	KL2(Very high)	OCL1(Very high)	1	1	1	0	1	0	0	0	0	0	1
GCF_001864035	2	195	IC2	2.5	2.5.6	2015	China	Asia	6	16	KL3(Very high)	OCL1(Very high)	1	1	1	0	1	0	1	0	0	0	1
GCF_001864045	2	191	IC2	2.4	2.4.13	2015	China	Asia	7	19	KL72(Very high)	OCL1(Very high)	1	0	1	0	1	1	1	0	0	0	1
GCF_001864065	2	784	IC2	2.4	2.4.6	2014	China	Asia	6	17	KL14(Very high)	OCL1(Very high)	1	1	1	0	1	1	0	0	0	0	1
GCF_001864095	46	1333				2015	China	Asia	4	8	KL77(Very high)	OCL1(Very high)	1	0	1	0	0	0	0	0	0	0	0
GCF_001864115	2	784	IC2	2.4	2.4.6	2014	China	Asia	6	14	KL14(Very high)	OCL1(Very high)	1	1	1	0	1	1	0	0	0	0	1
GCF_001864125	2	784	IC2	2.4	2.4.6	2014	China	Asia	8	22	KL14(Very high)	OCL1(Very high)	1	1	1	0	1	1	1	0	0	0	1
GCF_001864155	46	1332				2014	China	Asia	6	10	KL2(Very high)	OCL1(Very high)	1	1	1	0	0	1	0	0	0	0	0
GCF_001864165	46	1333				2014	China	Asia	4	8	KL77(Very high)	OCL1(Very high)	1	0	1	0	0	0	0	0	0	0	0
GCF_001864195	2	195	IC2	2.5	2.5.6	2014	China	Asia	6	18	KL3(Very high)	OCL1(Very high)	1	1	1	0	1	0	1	0	0	0	1
GCF_001864235	46	1333				2014	China	Asia	4	8	KL77(Very high)	OCL1(Very high)	1	0	1	0	0	0	0	0	0	0	0
GCF_001864285	2	381	IC2	2.4	2.4.7	2015	China	Asia	7	19	KL77(Perfect)	OCL1(Very high)	1	0	1	0	1	1	1	0	0	0	1
GCF_001864305	2	547	IC2	2.5	2.5.6	2015	China	Asia	7	17	KL14(Very high)	OCL1(Very high)	1	1	1	0	1	1	1	0	0	0	1
GCF_001864315	2	547	IC2	2.5	2.5.6	2015	China	Asia	7	17	KL14(Very high)	OCL1(Very high)	1	1	1	0	1	1	1	0	0	0	1
GCF_001864355	46	1333				2015	China	Asia	4	8	KL77(Very high)	OCL1(Very high)	1	0	1	0	0	0	0	0	0	0	0
GCF_001864375	2	381	IC2	2.4	2.4.7	2015	China	Asia	7	18	KL77(Very high)	OCL1(Very high)	1	0	1	0	1	1	1	0	0	0	1
GCF_001864385	2	381	IC2	2.4	2.4.7	2015	China	Asia	7	19	KL77(Perfect)	OCL1(Very high)	1	0	1	0	1	1	1	0	0	0	1
GCF_001864395	2	208	IC2	2.4	2.4.2	2015	China	Asia	8	21	KL2(Very high)	OCL1(Very high)	1	1	1	0	1	1	1	0	0	0	1
GCF_001864435	46	1333				2015	China	Asia	4	8	KL77(Very high)	OCL1(Very high)	1	0	1	0	0	0	0	0	0	0	0
GCF_001864455	2	191	IC2	2.4	2.4.13	2015	China	Asia	5	12	KL72(Very high)	OCL1(Very high)	1	0	1	0	1	1	0	0	0	0	1
GCF_001864465	46	1333				2015	China	Asia	4	8	KL77(Very high)	OCL1(Very high)	1	0	1	0	0	0	0	0	0	0	0
GCF_001864475	2	195	IC2	2.5	2.5.6	2015	China	Asia	7	20	KL3(Very high)	OCL1(Very high)	1	1	1	0	1	1	1	0	0	0	1
GCF_001864505	2	195	IC2	2.5	2.5.6	2015	China	Asia	7	19	KL3(Very high)	OCL1(Very high)	1	1	1	0	1	1	1	0	0	0	1
GCF_001864535	New Pasteur ST	451	IC2	2.4	2.4.6	2012	China	Asia	6	17	KL138(Good)	OCL1(Very high)	1	1	1	0	1	1	0	0	0	0	1
GCF_001864555	23	642	IC8			2012	China	Asia	6	11	KL8(Very high)	OCL2(Good)	1	1	1	0	0	1	0	0	0	0	1
GCF_001864565	2	208	IC2	2.4	2.4.13	2012	China	Asia	8	23	KL2(Very high)	OCL1(Very high)	1	1	1	0	1	1	1	0	0	0	1
GCF_001864575	879	1346				2013	China	Asia	2	5	KL65(Very high)	OCL1(Very high)	1	0	0	0	0	0	0	0	0	0	0
GCF_001864615	2	451	IC2	2.4	2.4.6	2014	China	Asia	8	22	KL138(Good)	OCL1(Very high)	1	1	1	0	1	1	1	0	0	0	1
GCF_001864635	2	208	IC2	2.4	2.4.13	2014	China	Asia	7	20	KL2(Very high)	OCL1(Very high)	1	0	1	0	1	1	1	0	0	0	1
GCF_001864655	2	191	IC2	2.4	2.4.10	2013	China	Asia	6	17	KL72(Very high)	OCL1(Very high)	1	0	1	0	1	1	1	0	0	0	1
GCF_001864665	New Pasteur ST	New Oxford ST	IC2	2.4	2.4.13	2013	China	Asia	8	23	KL2(Very high)	OCL1(Very high)	1	1	1	0	1	1	1	0	0	0	1
GCF_001864675	2	784	IC2	2.4	2.4.6	2014	China	Asia	6	17	KL14(Very high)	OCL1(Very high)	1	1	1	0	1	1	0	0	0	0	1
GCF_001864715	10	447	IC8			2014	China	Asia	3	7	KL49(Very high)	OCL2(Very high)	1	0	0	0	0	0	0	0	0	0	1
GCF_001864745	New Pasteur ST	New Oxford ST	IC2	2.4	2.4.10	2013	China	Asia	7	18	KL72(Very high)	OCL1(Very high)	1	0	1	0	1	1	1	0	0	0	1
GCF_001864755	2	208	IC2	2.4	2.4.2	2013	China	Asia	8	20	KL2(Very high)	OCL1(Very high)	1	1	1	0	1	1	1	0	0	0	1
GCF_001864795	2	547	IC2	2.5	2.5.6	2014	China	Asia	5	13	KL14(Very high)	OCL1(Very high)	1	1	1	0	1	0	0	0	0	0	1
GCF_001864815	2	191	IC2	2.4	2.4.13	2014	China	Asia	5	11	KL72(Very high)	OCL1(Very high)	1	0	1	0	1	1	0	0	0	0	1
GCF_001874685	79	124	IC5			Unknown	United States	North America	5	16	KL151(Very high)	OCL1(Very high)	1	0	1	0	0	1	0	0	0	0	1
GCF_001874765	85	1089	IC9			Unknown	United States	North America	6	14	KL152(Perfect)	OCL6(Very high)	1	0	1	0	0	1	0	0	0	0	1
GCF_001874885	85	1089	IC9			Unknown	United States	North America	6	14	KL152(Perfect)	OCL6(Very high)	1	0	1	0	0	1	0	0	0	0	1
GCF_001874915	2	218	IC2	2.4	2.4.0	Unknown	United States	North America	7	20	KL9(Very high)	OCL1(High)	1	1	1	0	1	1	1	0	0	0	1
GCF_001874945	1	207	IC1	1.4	1.4.9	Unknown	United States	North America	7	19	KL4(Very high)	OCL3(Perfect)	1	1	1	0	1	1	0	0	0	0	1
GCF_001887305	2	208	IC2	2.4	2.4.13	2014	China	Asia	8	21	KL2(Very high)	OCL1(Very high)	1	1	1	0	1	1	1	0	0	0	1
GCF_001891205	920	2127				2014	Colombia	South America	2	6	KL172(Perfect)	OCL4(Very high)	0	0	1	0	0	0	0	0	0	0	0
GCF_001895125	412	New Oxford ST				2015	Japan	Asia	7	18	KL174(Very high)	OCL2(High)	1	0	1	0	0	1	1	0	0	0	0
GCF_001612075	2	848	IC2	2.3	2.3.2	2007	United States	North America	6	16	KL13(Perfect)	OCL1(Good)	1	1	1	0	1	1	0	0	0	0	1
GCF_001896005	79	1942	IC5			2009	Mexico	North America	5	17	KL23(High)	OCL10(Very high)	1	0	1	0	1	1	0	0	0	0	1
GCF_001902375	2	368	IC2	2.4	2.4.5	2007	China	Asia	8	24	KL34(Very high)	OCL1(Very high)	1	1	1	0	1	1	1	0	0	0	1
GCF_001907125	2	348	IC2	2.3	2.3.2	2009	Croatia	Europe	5	13	KL9(Very high)	OCL1(Very high)	1	1	1	0	1	0	0	0	0	0	1
GCF_001907145	1	661	IC1	1.4	1.4.10	2003	Croatia	Europe	5	12	KL42(Very high)	OCL1(Perfect)	1	0	1	0	0	1	0	0	0	0	1
GCF_001907155	1	231	IC1	1.4	1.4.9	2013	Croatia	Europe	5	13	KL17(Good)	OCL1(Very high)	1	0	1	0	0	1	0	0	0	0	1
GCF_001612095	25	993	IC7			2007	United States	North America	6	16	KL13(Very high)	OCL5(Very high)	1	1	1	0	0	1	0	0	0	0	1
GCF_001909135	2	195	IC2	2.5	2.5.6	2013	India	Asia	7	16	KL3(Very high)	OCL1(Very high)	1	1	1	0	1	1	1	0	0	0	1
GCF_001910585	1580	1305	IC2	2.5	2.5.6	2016	Lebanon	Asia	7	21	KL3(Very high)	OCL1(Very high)	1	1	1	0	1	1	1	0	0	0	1
GCF_001910595	2	218	IC2	2.5	2.5.6	2016	Lebanon	Asia	6	16	KL9(Very high)	OCL1(Very high)	1	1	1	0	1	0	1	0	0	0	1
GCF_001910605	1580	195	IC2	2.5	2.5.6	2016	Lebanon	Asia	7	20	KL3(Very high)	OCL1(Very high)	1	1	1	0	1	1	1	0	0	0	1
GCF_001910615	1580	195	IC2	2.5	2.5.6	2016	Lebanon	Asia	7	19	KL3(Very high)	OCL1(Very high)	1	1	1	0	1	1	1	0	0	0	1
GCF_001910665	1580	195	IC2	2.5	2.5.6	2016	Lebanon	Asia	7	19	KL3(Good)	OCL1(Very high)	1	1	1	0	1	1	1	0	0	0	1
GCF_001910675	2	218	IC2	2.5	2.5.6	2016	Lebanon	Asia	6	16	KL9(Very high)	OCL1(Very high)	1	1	1	0	1	0	1	0	0	0	1
GCF_001910685	1580	195	IC2	2.5	2.5.6	2016	Lebanon	Asia	7	19	KL3(Good)	OCL1(Very high)	1	1	1	0	1	1	1	0	0	0	1
GCF_001612105	25	993	IC7			2007	United States	North America	6	15	KL13(Very high)	OCL5(Very high)	1	1	1	0	0	1	0	0	0	0	1
GCF_001612115	717	441	IC1	1.4	1.4.10	2007	United States	North America	5	12	KL18(Very high)	OCL3(Very high)	1	0	1	0	0	1	0	0	0	0	1
GCF_001612155	2	848	IC2	2.3	2.3.2	2007	United States	North America	6	16	KL13(Perfect)	OCL1(Good)	1	1	1	0	1	1	0	0	0	0	1
GCF_001922425	156	758	IC5			2012	Mexico	North America	5	16	KL9(Very high)	OCL10(Very high)	1	0	1	0	0	1	0	0	0	0	1
GCF_001922635	156	758	IC5			2012	Mexico	North America	5	14	KL9(Very high)	OCL10(Very high)	1	0	1	0	0	1	0	0	0	0	1
GCF_001922685	156	758	IC5			2013	Mexico	North America	4	10	KL9(Very high)	OCL10(Very high)	1	0	1	0	0	0	0	0	0	0	1
GCF_001922695	156	758	IC5			2013	Mexico	North America	5	14	KL9(Very high)	OCL10(Very high)	1	0	1	0	0	1	0	0	0	0	1
GCF_001922705	156	758	IC5			2011	Mexico	North America	5	15	KL9(Very high)	OCL10(Very high)	1	0	1	0	0	1	0	0	0	0	1
GCF_001922745	156	758	IC5			2011	Mexico	North America	5	15	KL9(Very high)	OCL10(Very high)	1	0	1	0	0	1	0	0	0	0	1
GCF_001922755	156	758	IC5			2011	Mexico	North America	4	14	KL9(Very high)	OCL10(Very high)	1	0	1	0	0	0	0	0	0	0	1
GCF_001923005	156	758	IC5			2011	Mexico	North America	4	13	KL9(Very high)	OCL10(Very high)	1	0	1	0	0	0	0	0	0	0	1
GCF_001936675	738	1113				1944	United States	North America	3	5	KL47(Very high)	OCL6(Very high)	1	0	1	0	0	0	0	0	0	0	0
GCF_001939595	2	848	IC2	2.4	2.4.14	2015	India	Asia	9	24	KL13(Perfect)	OCL1(Very high)	1	1	1	0	1	1	1	0	0	0	1
GCF_001939605	2	451	IC2	2.5	2.5.6	2016	India	Asia	7	17	KL12(Very high)	OCL1(Very high)	1	1	1	0	1	1	1	0	0	0	1
GCF_001939665	2	848	IC2	2.4	2.4.14	2015	India	Asia	9	24	KL13(Perfect)	OCL1(Very high)	1	1	1	0	1	1	1	0	0	0	1
GCF_001941765	437	112				Unknown	Canada	North America	4	6	KL3(Perfect)	OCL2(Very high)	1	0	1	0	0	1	0	0	0	0	0
GCF_001949935	2	218	IC2	2.2	2.2.5	2010	Spain	Europe	6	13	KL42(Good)	OCL1(Good)	1	1	1	0	1	1	0	0	0	0	1
GCF_001949945	2	218	IC2	2.2	2.2.5	2010	Spain	Europe	6	13	KL42(Good)	OCL1(Good)	1	1	1	0	1	1	0	0	0	0	1
GCF_001949955	2	218	IC2	2.2	2.2.5	2010	Spain	Europe	6	13	KL42(Good)	OCL1(Low)	1	1	1	0	1	1	0	0	0	0	1
GCF_001949965	2	218	IC2	2.2	2.2.5	2010	Spain	Europe	5	12	KL42(Good)	OCL1(Low)	1	1	1	0	0	0	0	0	0	0	1
GCF_001950035	2	218	IC2	2.2	2.2.5	2010	Spain	Europe	6	13	KL42(Good)	OCL1(Good)	1	1	1	0	0	1	0	0	0	0	1
GCF_001950065	2	350	IC2	2.2	2.2.5	2000	Spain	Europe	6	14	KL9(None)	OCL1(Good)	1	1	1	0	0	1	0	0	0	0	1
GCF_001950085	2	218	IC2	2.2	2.2.5	2000	Spain	Europe	6	13	KL42(Good)	OCL1(Good)	1	1	1	0	0	1	0	0	0	0	1
GCF_001950095	3	106	IC3			2000	Spain	Europe	6	13	KL53(None)	OCL1(Good)	1	1	1	0	0	1	0	0	0	0	1
GCF_001950155	2	350	IC2	2.2	2.2.5	2000	Spain	Europe	6	13	KL9(None)	OCL1(Low)	1	1	1	0	0	1	0	0	0	0	1
GCF_001950165	2	208	IC2	2.3	2.3.2	2010	Spain	Europe	6	16	KL2(Low)	OCL1(Good)	1	1	1	0	1	1	0	0	0	0	1
GCF_001950195	2	218	IC2	2.2	2.2.5	2010	Spain	Europe	6	13	KL42(Good)	OCL1(Good)	1	1	1	0	1	1	0	0	0	0	1
GCF_001950215	2	218	IC2	2.2	2.2.5	2000	Spain	Europe	6	14	KL42(Good)	OCL1(Good)	1	1	1	0	1	1	0	0	0	0	1
GCF_001950265	2	New Oxford ST	IC2	2.2	2.2.5	2000	Spain	Europe	6	13	KL9(None)	OCL1(Good)	1	1	1	0	1	1	0	0	0	0	1
GCF_001950285	2	218	IC2	2.2	2.2.5	2000	Spain	Europe	6	13	KL42(Good)	OCL1(Low)	1	1	1	0	0	1	0	0	0	0	1
GCF_001950295	2	New Oxford ST	IC2	2.2	2.2.5	2010	Spain	Europe	6	13	KL42(Good)	OCL1(Good)	1	1	1	0	1	1	0	0	0	0	1
GCF_001950315	3	New Oxford ST	IC3			2000	Spain	Europe	4	9	KL1(None)	OCL11(None)	1	0	0	0	0	1	0	0	0	0	1
GCF_001997285	1168	New Oxford ST				Unknown	United States	North America	4	6	KL11(Good)	OCL8(Very high)	1	0	1	0	0	1	0	0	0	0	0
GCF_002006635	85	1089	IC9			2014	Ethiopia	Africa	8	16	KL152(Perfect)	OCL6(Very high)	1	0	1	0	0	1	1	0	0	0	1
GCF_002006655	85	1089	IC9			2014	Ethiopia	Africa	8	16	KL152(Perfect)	OCL6(Very high)	1	0	1	0	0	1	1	0	0	0	1
GCF_002006665	85	1089	IC9			2013	Ethiopia	Africa	8	16	KL152(Perfect)	OCL6(Very high)	1	0	1	0	0	1	1	0	0	0	1
GCF_001612175	2	848	IC2	2.3	2.3.2	2007	United States	North America	6	16	KL13(Perfect)	OCL1(Good)	1	1	1	0	1	1	0	0	0	0	1
GCF_001612185	2	848	IC2	2.3	2.3.2	2007	United States	North America	6	16	KL13(Perfect)	OCL1(Good)	1	1	1	0	1	1	0	0	0	0	1
GCF_001612215	3	928	IC3			2007	United States	North America	6	11	KL18(Good)	OCL1(Very high)	1	1	1	0	0	1	0	0	0	0	1
GCF_001612235	2	452	IC2	2.2	2.2.6	2007	United States	North America	5	14	KL3(Very high)	OCL1(Very high)	1	0	1	0	1	1	0	0	0	0	1
GCF_001612255	1	945	IC1	1.4	1.4.10	2007	United States	North America	7	19	KL25(Good)	OCL2(Very high)	1	0	1	0	0	1	0	1	0	0	1
GCF_001612275	1	945	IC1	1.4	1.4.10	2008	United States	North America	5	10	KL25(Good)	OCL2(Very high)	1	0	1	0	0	1	0	0	0	0	1
GCF_001612285	2	848	IC2	2.3	2.3.2	2008	United States	North America	6	16	KL13(Perfect)	OCL1(Good)	1	1	1	0	1	1	0	0	0	0	1
GCF_001612315	2	848	IC2	2.3	2.3.2	2008	United States	North America	6	16	KL13(Perfect)	OCL1(Good)	1	1	1	0	1	1	0	0	0	0	1
GCF_001612335	2	452	IC2	2.2	2.2.6	2008	United States	North America	5	14	KL3(Very high)	OCL1(Very high)	1	0	1	0	1	1	0	0	0	0	1
GCF_001612355	2	452	IC2	2.2	2.2.6	2008	United States	North America	5	14	KL3(Very high)	OCL1(Very high)	1	0	1	0	1	1	0	0	0	0	1
GCF_001612365	2	452	IC2	2.2	2.2.6	2008	United States	North America	5	14	KL3(Very high)	OCL1(Very high)	1	0	1	0	1	1	0	0	0	0	1
GCF_001612395	2	452	IC2	2.2	2.2.6	2008	United States	North America	5	14	KL3(Very high)	OCL1(Very high)	1	0	1	0	1	1	0	0	0	0	1
GCF_001612415	1	207	IC1	1.4	1.4.9	2008	United States	North America	7	17	KL4(Perfect)	OCL3(Perfect)	1	1	1	0	0	1	0	0	0	0	1
GCF_001612435	1	945	IC1	1.4	1.4.10	2009	United States	North America	5	10	KL25(Very high)	OCL2(Very high)	1	0	1	0	0	1	0	0	0	0	1
GCF_001612455	1	231	IC1	1.4	1.4.4	2008	United States	North America	8	16	KL1(Perfect)	OCL1(Very high)	1	1	1	0	0	1	0	1	0	0	1
GCF_001618125	2	218	IC2	2.4	2.4.16	2012	United States	North America	8	20	KL7(Perfect)	OCL1(Very high)	1	1	1	0	1	1	1	0	0	0	1
GCF_001700395	2	208	IC2	2.4	2.4.2	2007	United States	North America	8	21	KL2(Very high)	OCL1(Very high)	1	1	1	0	1	1	1	0	0	0	1
GCF_001700445	79	124	IC5			2013	United States	North America	6	17	KL152(Good)	OCL10(Good)	1	0	1	0	0	1	0	0	0	0	1
GCF_001895985	2	208	IC2	2.4	2.4.2	2008	United States	North America	8	23	KL2(Very high)	OCL1(Very high)	1	1	1	0	1	1	1	0	0	0	1
GCF_001908295	10	447	IC8			1997	United States	North America	5	16	KL49(High)	OCL2(Very high)	1	0	1	0	0	1	0	0	0	0	1
GCF_001922205	2	208	IC2	2.4	2.4.2	2009	United States	North America	8	24	KL2(Very high)	OCL1(Very high)	1	1	1	0	1	1	1	0	0	0	1
GCF_001922225	2	208	IC2	2.4	2.4.2	2009	United States	North America	8	21	KL2(Very high)	OCL1(Very high)	1	1	1	0	1	1	1	0	0	0	1
GCF_001922245	2	208	IC2	2.4	2.4.2	2009	United States	North America	8	22	KL2(Very high)	OCL1(Very high)	1	1	1	0	1	1	1	0	0	0	1
GCF_002014105	78	944	IC6			2009	United States	North America	4	8	KL155(Good)	OCL1(Very high)	1	0	1	0	0	0	0	0	0	0	1
GCF_002014155	New Pasteur ST	350	IC2	2.2	2.2.5	2009	United States	North America	6	17	KL9(Good)	OCL1(Good)	1	1	1	0	1	1	0	0	0	0	1
GCF_002014175	2	350	IC2	2.2	2.2.5	2009	United States	North America	6	15	KL9(Good)	OCL1(Good)	1	1	1	0	1	1	0	0	0	0	1
GCF_002014195	2	208	IC2	2.4	2.4.2	2009	United States	North America	5	13	KL2(Very high)	OCL1(Very high)	1	1	1	0	1	0	0	0	0	0	1
GCF_002014235	2	208	IC2	2.4	2.4.2	2009	United States	North America	5	13	KL2(Very high)	OCL1(Very high)	1	1	1	0	1	0	0	0	0	0	1
GCF_002014245	2	281	IC2	2.2	2.2.4	2013	United States	North America	5	13	KL22(Very high)	OCL3(Good)	1	0	1	0	1	1	0	0	0	0	1
GCF_002014265	2	350	IC2	2.2	2.2.5	2009	United States	North America	6	15	KL9(Very high)	OCL1(Good)	1	1	1	0	1	1	0	0	0	0	1
GCF_002014275	1088	1703				2013	United States	North America	5	11	KL9(Good)	OCL1(Very high)	1	0	1	0	0	1	0	0	0	0	0
GCF_002014315	1195	1490				2009	United States	North America	3	5	KL3(Very high)	OCL2(Very high)	1	0	1	0	0	0	0	0	0	0	0
GCF_002014325	250	New Oxford ST				2009	United States	North America	5	11	KL22(Very high)	OCL1(Very high)	1	1	0	0	0	1	0	0	0	0	0
GCF_002014345	406	310				2009	United States	North America	5	10	KL1(Very high)	OCL1(Very high)	1	0	1	0	1	1	0	0	0	0	0
GCF_002014355	2	350	IC2	2.2	2.2.5	2009	United States	North America	6	15	KL9(Very high)	OCL1(Good)	1	1	1	0	1	1	0	0	0	0	1
GCF_002014395	2	348	IC2	2.3	2.3.2	2009	United States	North America	5	14	KL9(Good)	OCL1(Very high)	1	1	1	0	1	0	0	0	0	0	1
GCF_002014405	2	348	IC2	2.3	2.3.2	2009	United States	North America	5	13	KL9(Good)	OCL1(Very high)	1	1	1	0	1	0	0	0	0	0	1
GCF_002014435	2	208	IC2	2.4	2.4.2	2009	United States	North America	5	11	KL2(Very high)	OCL1(Very high)	1	1	1	0	1	0	0	0	0	0	1
GCF_002014445	2	208	IC2	2.4	2.4.2	2009	United States	North America	5	12	KL2(Very high)	OCL1(Very high)	1	1	1	0	1	0	0	0	0	0	1
GCF_002014475	2	417	IC2	2.3	2.3.2	2013	United States	North America	5	13	KL23(Very high)	OCL1(Very high)	1	1	1	0	1	0	0	0	0	0	1
GCF_002016655	1088	1703				2013	United States	North America	5	10	KL9(Very high)	OCL1(Very high)	1	0	1	0	0	1	0	0	0	0	0
GCF_002016735	2	281	IC2	2.2	2.2.4	2013	United States	North America	5	12	KL22(Very high)	OCL3(Good)	1	0	1	0	1	1	0	0	0	0	1
GCF_002016745	2	417	IC2	2.3	2.3.2	2013	United States	North America	6	16	KL23(Very high)	OCL1(High)	1	1	1	0	1	1	0	0	0	0	1
GCF_002016775	2	350	IC2	2.2	2.2.5	2013	United States	North America	6	15	KL9(Very high)	OCL1(Good)	1	1	1	0	1	1	0	0	0	0	1
GCF_002016785	79	124	IC5			2013	United States	North America	5	15	KL151(Good)	OCL1(Very high)	1	0	1	0	0	1	0	0	0	0	1
GCF_002016815	2	281	IC2	2.2	2.2.4	2013	United States	North America	5	13	KL22(Very high)	OCL3(Good)	1	0	1	0	1	1	0	0	0	0	1
GCF_002016825	250	1739				2013	United States	North America	3	7	KL155(Very high)	OCL1(Very high)	1	0	0	0	0	0	0	0	0	0	0
GCF_002016855	406	310				2013	United States	North America	4	9	KL1(Good)	OCL1(Very high)	1	0	1	0	1	0	0	0	0	0	0
GCF_002016865	2	208	IC2	2.4	2.4.2	2013	United States	North America	6	13	KL2(Very high)	OCL1(Very high)	1	1	1	0	1	1	0	0	0	0	1
GCF_002016915	2	208	IC2	2.4	2.4.2	2011	United States	North America	5	13	KL2(Very high)	OCL1(Very high)	1	1	1	0	1	0	0	0	0	0	1
GCF_002016935	2	350	IC2	2.2	2.2.5	2011	United States	North America	6	15	KL9(Very high)	OCL1(Good)	1	1	1	0	1	1	0	0	0	0	1
GCF_002016955	2	350	IC2	2.2	2.2.5	2011	United States	North America	6	15	KL9(Very high)	OCL1(Good)	1	1	1	0	1	1	0	0	0	0	1
GCF_002016975	1088	1703				2011	United States	North America	5	10	KL9(Very high)	OCL1(Very high)	1	0	1	0	0	1	0	0	0	0	0
GCF_002016985	79	124	IC5			2012	United States	North America	5	15	KL151(Very high)	OCL10(Very high)	1	0	1	0	0	1	0	0	0	0	1
GCF_002016995	1088	1703				2012	United States	North America	5	11	KL9(Very high)	OCL1(Very high)	1	0	1	0	0	1	0	0	0	0	0
GCF_002017035	2	350	IC2	2.2	2.2.5	2012	United States	North America	6	12	KL9(Good)	OCL1(Good)	1	1	1	0	1	1	0	0	0	0	1
GCF_002017055	2	208	IC2	2.4	2.4.2	2012	United States	North America	5	13	KL2(Very high)	OCL1(Very high)	1	1	1	0	1	0	0	0	0	0	1
GCF_002017065	2	281	IC2	2.2	2.2.4	2012	United States	North America	4	12	KL22(Very high)	OCL3(Low)	1	0	0	0	1	1	0	0	0	0	1
GCF_002017095	2	281	IC2	2.2	2.2.4	2012	United States	North America	4	12	KL22(Very high)	OCL3(Low)	1	0	0	0	1	1	0	0	0	0	1
GCF_002017105	2	350	IC2	2.2	2.2.5	2012	United States	North America	6	14	KL9(Very high)	OCL1(Good)	1	1	1	0	1	1	0	0	0	0	1
GCF_002017115	2	281	IC2	2.2	2.2.4	2012	United States	North America	5	13	KL22(Very high)	OCL3(Good)	1	0	1	0	1	1	0	0	0	0	1
GCF_002017125	2	208	IC2	2.4	2.4.2	2012	United States	North America	5	13	KL2(Very high)	OCL1(Very high)	1	1	1	0	1	0	0	0	0	0	1
GCF_002017175	1088	1703				2012	United States	North America	4	9	KL9(Very high)	OCL1(Very high)	1	0	1	0	0	0	0	0	0	0	0
GCF_002017185	2	208	IC2	2.3	2.3.2	2012	United States	North America	6	13	KL2(Very high)	OCL1(Very high)	1	1	1	0	1	1	0	0	0	0	1
GCF_002017195	2	350	IC2	2.2	2.2.5	2009	United States	North America	6	15	KL9(Very high)	OCL1(Good)	1	1	1	0	1	1	0	0	0	0	1
GCF_002017205	2	281	IC2	2.2	2.2.4	2013	United States	North America	4	11	KL22(Very high)	OCL3(Low)	1	0	0	0	1	1	0	0	0	0	1
GCF_002017255	2	350	IC2	2.2	2.2.5	2010	United States	North America	6	15	KL9(Very high)	OCL1(Good)	1	1	1	0	1	1	0	0	0	0	1
GCF_002017265	2	350	IC2	2.2	2.2.5	2010	United States	North America	6	15	KL9(Very high)	OCL1(Good)	1	1	1	0	1	1	0	0	0	0	1
GCF_002017285	2	350	IC2	2.2	2.2.5	2010	United States	North America	6	15	KL9(Very high)	OCL1(Good)	1	1	1	0	1	1	0	0	0	0	1
GCF_002017315	79	124	IC5			2011	United States	North America	5	17	KL151(Good)	OCL1(Very high)	1	0	1	0	0	1	0	0	0	0	1
GCF_002017335	2	350	IC2	2.2	2.2.5	2013	United States	North America	6	15	KL9(Very high)	OCL1(Good)	1	1	1	0	1	1	0	0	0	0	1
GCF_002017345	2	208	IC2	2.4	2.4.12	2013	United States	North America	5	13	KL152(Very high)	OCL1(Very high)	1	1	1	0	1	0	0	0	0	0	1
GCF_002018935	79	233	IC5			2010	Brazil	South America	8	18	KL9(None)	OCL11(None)	1	0	1	0	1	1	0	1	0	0	1
GCF_002018965	79	233	IC5			2010	Brazil	South America	8	18	KL9(None)	OCL11(Good)	1	0	1	0	1	1	0	1	0	0	1
GCF_002018995	79	233	IC5			2011	Brazil	South America	8	18	KL9(None)	OCL1(None)	1	0	1	0	1	1	0	1	0	0	1
GCF_002019005	79	233	IC5			2011	Brazil	South America	9	20	KL9(None)	OCL11(None)	1	0	1	0	1	1	1	1	0	0	1
GCF_002019025	79	233	IC5			2011	Brazil	South America	9	20	KL9(None)	OCL1(None)	1	0	1	0	1	1	1	1	0	0	1
GCF_002019035	79	233	IC5			2011	Brazil	South America	7	17	KL49(None)	OCL1(None)	1	0	1	0	1	1	0	1	0	0	1
GCF_002017355	2	281	IC2	2.2	2.2.4	2013	United States	North America	5	13	KL22(Very high)	OCL3(Good)	1	0	1	0	1	1	0	0	0	0	1
GCF_002017395	2	281	IC2	2.2	2.2.4	2013	United States	North America	5	13	KL22(Very high)	OCL3(Good)	1	0	1	0	1	1	0	0	0	0	1
GCF_002017405	2	208	IC2	2.4	2.4.2	2011	United States	North America	5	13	KL2(Very high)	OCL1(Very high)	1	1	1	0	1	0	0	0	0	0	1
GCF_002017415	2	208	IC2	2.4	2.4.2	2013	United States	North America	6	13	KL2(Very high)	OCL1(Very high)	1	1	1	0	1	1	0	0	0	0	1
GCF_002072795	2	191	IC2	2.4	2.4.10	2016	China	Asia	7	16	KL9(Very high)	OCL1(Very high)	1	0	1	0	1	1	1	0	0	0	1
GCF_002082625	2	191	IC2	2.4	2.4.10	2013	South Korea	Asia	7	16	KL72(Very high)	OCL1(Very high)	1	0	1	0	1	1	1	0	0	0	1
GCF_002082645	2	208	IC2	2.4	2.4.2	2013	South Korea	Asia	5	15	KL2(Very high)	OCL1(Very high)	1	0	1	0	1	1	0	0	0	0	1
GCF_002082685	2	872	IC2	2.4	2.4.2	2014	South Korea	Asia	8	22	KL116(Perfect)	OCL1(Very high)	1	1	1	0	1	1	1	0	0	0	1
GCF_002082705	2	191	IC2	2.4	2.4.10	2013	South Korea	Asia	7	18	KL72(Very high)	OCL1(High)	1	0	1	0	1	1	1	0	0	0	1
GCF_002082725	2	357	IC2	2.4	2.4.2	2013	South Korea	Asia	8	21	KL48(Very high)	OCL1(Very high)	1	1	1	0	1	1	1	0	0	0	1
GCF_002082745	2	357	IC2	2.4	2.4.2	2013	South Korea	Asia	8	23	KL48(Very high)	OCL1(Very high)	1	1	1	0	1	1	1	0	0	0	1
GCF_002082785	25	229	IC7			2013	South Korea	Asia	9	23	KL14(Perfect)	OCL5(Very high)	1	1	1	0	0	1	1	0	0	0	1
GCF_002082805	10	447	IC8			2013	South Korea	Asia	6	11	KL49(Perfect)	OCL2(Very high)	1	1	1	0	0	1	0	0	0	0	1
GCF_002082825	1	491	IC1	1.4	1.4.9	2013	South Korea	Asia	5	13	KL40(Very high)	OCL3(High)	1	0	1	0	0	1	0	0	0	0	1
GCF_002082845	187	191	IC2	2.4	2.4.10	2013	South Korea	Asia	7	17	KL72(Good)	OCL1(Very high)	1	0	1	0	1	1	1	0	0	0	1
GCF_002082865	2	191	IC2	2.4	2.4.10	2013	South Korea	Asia	7	17	KL72(Very high)	OCL1(Very high)	1	0	1	0	1	1	1	0	0	0	1
GCF_002082885	2	191	IC2	2.4	2.4.10	2013	South Korea	Asia	7	16	KL72(Very high)	OCL1(Very high)	1	0	1	0	1	1	1	0	0	0	1
GCF_002085505	2	643	IC2	2.4	2.4.2	2009	China	Asia	8	20	KL8(Very high)	OCL1(Very high)	1	1	1	0	1	1	1	0	0	0	1
GCF_002093815	2	643	IC2	2.4	2.4.2	2012	China	Asia	8	22	KL8(Good)	OCL1(Very high)	1	1	1	0	1	1	1	0	0	0	1
GCF_002116575	2	195	IC2	2.5	2.5.6	2012	China	Asia	7	19	KL3(Good)	OCL1(Very high)	1	1	1	0	1	1	1	0	0	0	1
GCF_002017425	2	208	IC2	2.4	2.4.2	2011	United States	North America	5	13	KL2(Very high)	OCL1(Very high)	1	1	1	0	1	0	0	0	0	0	1
GCF_002119265	81	1868	IC1	1.4	1.4.6	2010	Spain	Europe	5	12	KL4(Very high)	OCL1(Perfect)	1	0	1	0	0	1	0	0	0	0	1
GCF_002119275	2	208	IC2	2.3	2.3.2	2008	Spain	Europe	7	17	KL2(Very high)	OCL1(Very high)	1	0	1	0	1	1	0	1	0	0	1
GCF_002119285	2	208	IC2	2.3	2.3.2	2008	Spain	Europe	7	17	KL2(Very high)	OCL1(Very high)	1	0	1	0	1	1	0	1	0	0	1
GCF_002119295	2	208	IC2	2.3	2.3.2	2008	Spain	Europe	7	17	KL2(Very high)	OCL1(Very high)	1	0	1	0	1	1	0	1	0	0	1
GCF_002119355	81	1868	IC1	1.4	1.4.6	2010	Spain	Europe	5	13	KL4(Very high)	OCL1(Perfect)	1	0	1	0	0	1	0	0	0	0	1
GCF_002136595	32	823				Unknown	Unknown	Unknown	2	4	KL2(Very high)	OCL6(Very high)	1	0	0	0	0	0	0	0	0	0	0
GCF_002136605	406	310				Unknown	Unknown	Unknown	5	11	KL1(Very high)	OCL1(Very high)	1	0	1	0	1	1	0	0	0	0	0
GCF_002136615	2	350	IC2	2.2	2.2.5	Unknown	Unknown	Unknown	7	18	KL9(Very high)	OCL1(Good)	1	1	1	0	1	1	1	0	0	0	1
GCF_002136655	150	744				Unknown	Unknown	Unknown	3	5	KL225(Good)	OCL6(Very high)	1	0	1	0	0	0	0	0	0	0	0
GCF_002136675	78	944	IC6			Unknown	Unknown	Unknown	3	5	KL155(Very high)	OCL1(Very high)	1	0	1	0	0	0	0	0	0	0	0
GCF_002136685	810	New Oxford ST				Unknown	Unknown	Unknown	3	5	KL175(Perfect)	OCL20(Perfect)	1	0	1	0	0	0	0	0	0	0	0
GCF_002136705	2	208	IC2	2.4	2.4.12	Unknown	Unknown	Unknown	8	21	KL2(Very high)	OCL1(Very high)	1	1	1	0	1	1	1	0	0	0	1
GCF_002136735	1048	749				Unknown	Unknown	Unknown	3	5	KL123(Perfect)	OCL15(Very high)	1	0	1	0	0	0	0	0	0	0	0
GCF_002136745	2	208	IC2	2.4	2.4.2	Unknown	Unknown	Unknown	8	22	KL2(Very high)	OCL1(Very high)	1	1	1	0	1	1	1	0	0	0	1
GCF_002136775	2	208	IC2	2.4	2.4.2	Unknown	Unknown	Unknown	8	23	KL2(Very high)	OCL1(Very high)	1	1	1	0	1	1	1	0	0	0	1
GCF_002136815	142	New Oxford ST				Unknown	Unknown	Unknown	3	5	KL74(Perfect)	OCL6(High)	1	0	1	0	0	0	0	0	0	0	0
GCF_002136825	2	350	IC2	2.2	2.2.5	Unknown	Unknown	Unknown	6	14	KL9(Very high)	OCL1(Good)	1	1	1	0	1	1	0	0	0	0	1
GCF_002136855	78	944	IC6			Unknown	Unknown	Unknown	4	7	KL155(Very high)	OCL1(Very high)	1	0	1	0	0	0	0	0	0	0	1
GCF_002136885	2	350	IC2	2.2	2.2.5	Unknown	Unknown	Unknown	7	18	KL9(Very high)	OCL1(Good)	1	1	1	0	1	1	1	0	0	0	1
GCF_002136895	48	New Oxford ST				Unknown	Unknown	Unknown	2	4	KL19(Very high)	OCL1(Very high)	1	0	0	0	0	0	0	0	0	0	0
GCF_002136935	2	208	IC2	2.4	2.4.2	Unknown	Unknown	Unknown	8	22	KL2(Very high)	OCL1(Very high)	1	1	1	0	1	1	1	0	0	0	1
GCF_002136955	494	753				Unknown	Unknown	Unknown	5	9	KL112(Very high)	OCL9(Very high)	1	1	1	0	0	1	0	0	0	0	0
GCF_002136965	2	208	IC2	2.4	2.4.2	Unknown	Unknown	Unknown	8	23	KL2(Very high)	OCL1(Very high)	1	1	1	0	1	1	1	0	0	0	1
GCF_002136995	464	1752	IC9			Unknown	Unknown	Unknown	3	5	KL121(Very high)	OCL6(Very high)	1	0	1	0	0	0	0	0	0	0	0
GCF_002137035	2	281	IC2	2.2	2.2.4	Unknown	Unknown	Unknown	4	12	KL22(Very high)	OCL3(Low)	1	0	0	0	1	1	0	0	0	0	1
GCF_002137045	2	208	IC2	2.4	2.4.2	Unknown	Unknown	Unknown	8	22	KL2(Very high)	OCL1(Very high)	1	1	1	0	1	1	1	0	0	0	1
GCF_002137185	78	944	IC6			Unknown	Unknown	Unknown	4	7	KL155(Very high)	OCL1(Very high)	1	0	1	0	0	0	0	0	0	0	1
GCF_002137215	49	128				Unknown	Unknown	Unknown	2	4	KL11(Perfect)	OCL8(Very high)	1	0	0	0	0	0	0	0	0	0	0
GCF_002137225	2	281	IC2	2.2	2.2.4	Unknown	Unknown	Unknown	5	13	KL22(Very high)	OCL3(Good)	1	0	1	0	1	1	0	0	0	0	1
GCF_002137255	848	New Oxford ST				Unknown	Unknown	Unknown	3	5	KL116(Very high)	OCL5(Good)	1	0	1	0	0	0	0	0	0	0	0
GCF_002137265	498	New Oxford ST				Unknown	Unknown	Unknown	2	4	KL14(Very high)	OCL6(Very high)	1	0	0	0	0	0	0	0	0	0	0
GCF_002137285	2	208	IC2	2.4	2.4.2	Unknown	Unknown	Unknown	8	22	KL2(Very high)	OCL1(Very high)	1	1	1	0	1	1	1	0	0	0	1
GCF_002137295	2	208	IC2	2.3	2.3.2	Unknown	Unknown	Unknown	6	19	KL2(Very high)	OCL1(Very high)	1	1	1	0	1	1	0	0	0	0	1
GCF_002137335	406	310				Unknown	Unknown	Unknown	5	11	KL1(High)	OCL1(Very high)	1	0	1	0	0	1	0	0	0	0	0
GCF_002137345	2	208	IC2	2.4	2.4.2	Unknown	Unknown	Unknown	8	22	KL2(Very high)	OCL1(Very high)	1	1	1	0	1	1	1	0	0	0	1
GCF_002137395	2	417	IC2	2.3	2.3.2	Unknown	Unknown	Unknown	7	17	KL23(Very high)	OCL1(Very high)	1	1	1	0	1	1	1	0	0	0	1
GCF_002137425	2	348	IC2	2.3	2.3.2	Unknown	Unknown	Unknown	6	17	KL9(Good)	OCL1(Very high)	1	1	1	0	1	0	1	0	0	0	1
GCF_002137445	2	208	IC2	2.4	2.4.12	Unknown	Unknown	Unknown	8	20	KL2(Very high)	OCL1(Very high)	1	1	1	0	1	1	1	0	0	0	1
GCF_002137475	2	350	IC2	2.2	2.2.5	Unknown	Unknown	Unknown	7	16	KL9(Very high)	OCL1(Good)	1	1	1	0	1	1	1	0	0	0	1
GCF_002137495	79	124	IC5			Unknown	Unknown	Unknown	5	15	KL151(Good)	OCL1(Very high)	1	0	1	0	0	1	0	0	0	0	1
GCF_002137525	2	208	IC2	2.4	2.4.2	Unknown	Unknown	Unknown	8	22	KL2(Very high)	OCL1(Very high)	1	1	1	0	1	1	1	0	0	0	1
GCF_002137555	2	350	IC2	2.2	2.2.5	Unknown	Unknown	Unknown	7	18	KL9(Good)	OCL1(Good)	1	1	1	0	1	1	1	0	0	0	1
GCF_002137565	2	281	IC2	2.2	2.2.4	Unknown	Unknown	Unknown	5	13	KL22(Very high)	OCL3(Good)	1	0	1	0	1	1	0	0	0	0	1
GCF_002137575	203	New Oxford ST				Unknown	Unknown	Unknown	2	4	KL81(Good)	OCL5(Good)	1	0	0	0	0	0	0	0	0	0	0
GCF_002137645	49	128				Unknown	Unknown	Unknown	2	4	KL11(Perfect)	OCL8(Very high)	1	0	0	0	0	0	0	0	0	0	0
GCF_002137655	81	498	IC1	1.2	1.2.2	Unknown	Unknown	Unknown	5	11	KL12(Perfect)	OCL2(Perfect)	1	0	1	0	0	1	0	0	0	0	1
GCF_002137695	2	350	IC2	2.2	2.2.5	Unknown	Unknown	Unknown	7	18	KL9(Very high)	OCL1(Good)	1	1	1	0	1	1	1	0	0	0	1
GCF_002137715	2	281	IC2	2.2	2.2.4	Unknown	Unknown	Unknown	4	12	KL22(Very high)	OCL3(Low)	1	0	0	0	1	1	0	0	0	0	1
GCF_002137725	126	New Oxford ST				Unknown	Unknown	Unknown	4	8	KL37(Very high)	OCL6(Very high)	1	0	1	0	0	1	0	0	0	0	0
GCF_002137755	10	447	IC8			Unknown	Unknown	Unknown	4	8	KL49(Very high)	OCL2(Very high)	1	0	1	0	0	0	0	0	0	0	1
GCF_002137775	48	New Oxford ST				Unknown	Unknown	Unknown	2	4	KL19(Very high)	OCL1(Very high)	1	0	0	0	0	0	0	0	0	0	0
GCF_002137795	2	208	IC2	2.4	2.4.2	Unknown	Unknown	Unknown	8	21	KL2(Very high)	OCL1(Very high)	1	1	1	0	1	1	1	0	0	0	1
GCF_002137815	2	208	IC2	2.4	2.4.2	Unknown	Unknown	Unknown	8	24	KL2(Very high)	OCL1(Very high)	1	1	1	0	1	1	1	0	0	0	1
GCF_002137875	2	208	IC2	2.4	2.4.2	Unknown	Unknown	Unknown	8	22	KL2(Very high)	OCL1(Very high)	1	1	1	0	1	1	1	0	0	0	1
GCF_002137895	2	417	IC2	2.3	2.3.2	Unknown	Unknown	Unknown	7	19	KL23(Very high)	OCL1(Very high)	1	1	1	0	1	1	1	0	0	0	1
GCF_002137945	203	New Oxford ST				Unknown	Unknown	Unknown	3	5	KL52(Very high)	OCL6(Very high)	1	0	1	0	0	0	0	0	0	0	0
GCF_002137955	150	744				Unknown	Unknown	Unknown	3	5	KL23(Very high)	OCL6(Very high)	1	0	1	0	0	0	0	0	0	0	0
GCF_002137995	2	281	IC2	2.2	2.2.4	Unknown	Unknown	Unknown	5	13	KL22(Very high)	OCL3(Good)	1	0	1	0	1	1	0	0	0	0	1
GCF_002138005	2	208	IC2	2.4	2.4.12	Unknown	Unknown	Unknown	8	20	KL2(Very high)	OCL1(Very high)	1	1	1	0	1	1	1	0	0	0	1
GCF_002138035	2	350	IC2	2.2	2.2.5	Unknown	Unknown	Unknown	7	18	KL9(Very high)	OCL1(Good)	1	1	1	0	1	1	1	0	0	0	1
GCF_002138055	32	1627				Unknown	Unknown	Unknown	5	9	KL109(Very high)	OCL6(Very high)	1	0	1	0	0	1	0	0	0	0	0
GCF_002138065	78	944	IC6			Unknown	Unknown	Unknown	4	7	KL155(Very high)	OCL1(Very high)	1	0	1	0	0	0	0	0	0	0	1
GCF_002138105	25	1760	IC7			Unknown	Unknown	Unknown	5	11	KL151(Good)	OCL5(Very high)	1	1	1	0	0	1	0	0	0	0	0
GCF_002138115	2	208	IC2	2.4	2.4.2	Unknown	Unknown	Unknown	8	24	KL2(Very high)	OCL1(Very high)	1	1	1	0	1	1	1	0	0	0	1
GCF_002138155	49	128				Unknown	Unknown	Unknown	2	4	KL11(Perfect)	OCL8(Very high)	1	0	0	0	0	0	0	0	0	0	0
GCF_002138165	2	350	IC2	2.2	2.2.5	Unknown	Unknown	Unknown	7	18	KL9(Very high)	OCL1(Good)	1	1	1	0	1	1	1	0	0	0	1
GCF_002138175	669	1008				Unknown	Unknown	Unknown	2	4	KL171(Perfect)	OCL4(Very high)	1	0	0	0	0	0	0	0	0	0	0
GCF_002138215	2	208	IC2	2.4	2.4.12	Unknown	Unknown	Unknown	8	20	KL2(Very high)	OCL1(Very high)	1	1	1	0	1	1	1	0	0	0	1
GCF_002138245	2	350	IC2	2.2	2.2.5	Unknown	Unknown	Unknown	7	18	KL9(Very high)	OCL1(Good)	1	1	1	0	1	1	1	0	0	0	1
GCF_002138295	2	281	IC2	2.2	2.2.4	Unknown	Unknown	Unknown	4	12	KL22(Very high)	OCL3(Low)	1	0	0	0	1	1	0	0	0	0	1
GCF_002138305	2	417	IC2	2.3	2.3.2	Unknown	Unknown	Unknown	7	18	KL23(Very high)	OCL1(Very high)	1	1	1	0	1	1	1	0	0	0	1
GCF_002138315	2	281	IC2	2.2	2.2.4	Unknown	Unknown	Unknown	5	12	KL22(Very high)	OCL3(Good)	1	0	1	0	1	1	0	0	0	0	1
GCF_002138345	2	208	IC2	2.4	2.4.2	Unknown	Unknown	Unknown	8	22	KL2(Very high)	OCL1(Very high)	1	1	1	0	1	1	1	0	0	0	1
GCF_002138375	2	208	IC2	2.4	2.4.2	Unknown	Unknown	Unknown	8	22	KL2(Very high)	OCL1(Very high)	1	1	1	0	1	1	1	0	0	0	1
GCF_002142735	1048	749				Unknown	Unknown	Unknown	3	5	KL123(Perfect)	OCL15(Very high)	1	0	1	0	0	0	0	0	0	0	0
GCF_002142935	2	350	IC2	2.2	2.2.5	Unknown	Unknown	Unknown	7	21	KL9(Good)	OCL1(Good)	1	1	1	0	1	1	1	0	0	0	1
GCF_002142945	509	1056				Unknown	Unknown	Unknown	3	5	KL105(Very high)	OCL6(High)	1	0	1	0	0	0	0	0	0	0	0
GCF_002142955	2	350	IC2	2.2	2.2.5	Unknown	Unknown	Unknown	7	18	KL9(Very high)	OCL1(Good)	1	1	1	0	1	1	1	0	0	0	1
GCF_002142995	2	208	IC2	2.4	2.4.2	Unknown	Unknown	Unknown	8	23	KL2(Very high)	OCL1(Very high)	1	1	1	0	1	1	1	0	0	0	1
GCF_002143015	2	350	IC2	2.2	2.2.5	Unknown	Unknown	Unknown	7	17	KL9(Very high)	OCL1(Good)	1	1	1	0	1	1	1	0	0	0	1
GCF_002143035	2	350	IC2	2.2	2.2.5	Unknown	Unknown	Unknown	7	18	KL9(Very high)	OCL1(Good)	1	1	1	0	1	1	1	0	0	0	1
GCF_002143045	2	350	IC2	2.2	2.2.5	Unknown	Unknown	Unknown	7	18	KL9(Good)	OCL1(Good)	1	1	1	0	1	1	1	0	0	0	1
GCF_002143095	2	350	IC2	2.2	2.2.5	Unknown	Unknown	Unknown	7	18	KL9(Very high)	OCL1(Good)	1	1	1	0	1	1	1	0	0	0	1
GCF_002143105	2	350	IC2	2.2	2.2.5	Unknown	Unknown	Unknown	7	18	KL9(Very high)	OCL1(Good)	1	1	1	0	1	1	1	0	0	0	1
GCF_002143145	79	124	IC5			Unknown	Unknown	Unknown	5	17	KL151(Very high)	OCL10(Good)	1	0	1	0	1	1	0	0	0	0	1
GCF_002143185	39	New Oxford ST				Unknown	Unknown	Unknown	3	5	KL119(Perfect)	OCL12(Very high)	1	0	1	0	0	0	0	0	0	0	0
GCF_002143195	2	208	IC2	2.4	2.4.12	Unknown	Unknown	Unknown	8	21	KL2(Very high)	OCL1(Very high)	1	1	1	0	1	1	1	0	0	0	1
GCF_002143235	2	281	IC2	2.2	2.2.4	Unknown	Unknown	Unknown	4	10	KL22(Very high)	OCL7(Very high)	1	0	1	0	1	0	0	0	0	0	1
GCF_002143265	2	208	IC2	2.4	2.4.2	Unknown	Unknown	Unknown	5	12	KL2(Very high)	OCL1(Very high)	1	1	1	0	1	0	0	0	0	0	1
GCF_002143275	1088	1703				Unknown	Unknown	Unknown	6	15	KL9(Very high)	OCL1(Very high)	1	1	1	0	0	1	0	0	0	0	0
GCF_002143315	2	208	IC2	2.4	2.4.2	Unknown	Unknown	Unknown	8	22	KL2(Very high)	OCL1(Very high)	1	1	1	0	1	1	1	0	0	0	1
GCF_002143335	2	350	IC2	2.2	2.2.5	Unknown	Unknown	Unknown	7	17	KL9(Very high)	OCL1(Good)	1	1	1	0	1	1	1	0	0	0	1
GCF_002143345	941	1451				Unknown	Unknown	Unknown	3	5	KL29(Very high)	OCL8(Very high)	1	0	1	0	0	0	0	0	0	0	0
GCF_002143375	406	310				Unknown	Unknown	Unknown	5	12	KL1(Very high)	OCL1(Very high)	1	0	1	0	1	1	0	0	0	0	0
GCF_002143395	2	208	IC2	2.4	2.4.2	Unknown	Unknown	Unknown	8	22	KL2(Very high)	OCL1(Very high)	1	1	1	0	1	1	1	0	0	0	1
GCF_002143405	2	350	IC2	2.2	2.2.5	Unknown	Unknown	Unknown	7	18	KL9(Very high)	OCL1(Good)	1	1	1	0	1	1	1	0	0	0	1
GCF_002143425	2	208	IC2	2.4	2.4.12	Unknown	Unknown	Unknown	8	19	KL2(Very high)	OCL1(Very high)	1	1	1	0	1	1	1	0	0	0	1
GCF_002143475	150	744				Unknown	Unknown	Unknown	3	5	KL23(Very high)	OCL6(Very high)	1	0	1	0	0	0	0	0	0	0	0
GCF_002143495	2	208	IC2	2.4	2.4.2	Unknown	Unknown	Unknown	8	22	KL2(Very high)	OCL1(Very high)	1	1	1	0	1	1	1	0	0	0	1
GCF_002143555	2	208	IC2	2.4	2.4.2	Unknown	Unknown	Unknown	8	22	KL2(Very high)	OCL1(Very high)	1	1	1	0	1	1	1	0	0	0	1
GCF_002143575	2	208	IC2	2.4	2.4.12	Unknown	Unknown	Unknown	8	21	KL2(Very high)	OCL1(Very high)	1	1	1	0	1	1	1	0	0	0	1
GCF_002143605	32	930				Unknown	Unknown	Unknown	3	5	KL2(Very high)	OCL6(Very high)	1	0	1	0	0	0	0	0	0	0	0
GCF_002143625	2	350	IC2	2.2	2.2.5	Unknown	Unknown	Unknown	7	15	KL9(Good)	OCL1(Good)	1	1	1	0	1	1	1	0	0	0	1
GCF_002143655	2	208	IC2	2.4	2.4.2	Unknown	Unknown	Unknown	8	22	KL2(Very high)	OCL1(Very high)	1	1	1	0	1	1	1	0	0	0	1
GCF_002143675	2	350	IC2	2.2	2.2.5	Unknown	Unknown	Unknown	7	18	KL9(Very high)	OCL1(Good)	1	1	1	0	1	1	1	0	0	0	1
GCF_002143685	2	208	IC2	2.4	2.4.2	Unknown	Unknown	Unknown	8	21	KL2(Very high)	OCL1(Very high)	1	1	1	0	1	1	1	0	0	0	1
GCF_002143715	2	208	IC2	2.4	2.4.12	Unknown	Unknown	Unknown	6	17	KL2(Very high)	OCL1(Very high)	1	1	1	0	1	0	1	0	0	0	1
GCF_002143725	48	New Oxford ST				Unknown	Unknown	Unknown	2	4	KL19(Very high)	OCL1(Very high)	1	0	0	0	0	0	0	0	0	0	0
GCF_002143755	406	310				Unknown	Unknown	Unknown	5	11	KL1(Very high)	OCL1(Very high)	1	0	1	0	1	1	0	0	0	0	0
GCF_002143775	2	208	IC2	2.4	2.4.2	Unknown	Unknown	Unknown	8	22	KL2(Very high)	OCL1(Very high)	1	1	1	0	1	1	1	0	0	0	1
GCF_002143785	2	350	IC2	2.2	2.2.5	Unknown	Unknown	Unknown	7	22	KL9(Good)	OCL1(Good)	1	1	1	0	1	1	1	0	0	0	1
GCF_002143795	2	New Oxford ST	IC2	2.4	2.4.2	Unknown	Unknown	Unknown	8	21	KL2(Very high)	OCL1(Very high)	1	1	1	0	1	1	1	0	0	0	1
GCF_002143835	2	848	IC2	2.3	2.3.2	Unknown	Unknown	Unknown	6	17	KL13(Perfect)	OCL1(Good)	1	1	1	0	1	1	0	0	0	0	1
GCF_002143855	10	447	IC8			Unknown	Unknown	Unknown	5	13	KL49(Very high)	OCL2(None)	1	1	1	0	0	1	0	0	0	0	0
GCF_002143875	32	New Oxford ST				Unknown	Unknown	Unknown	6	9	KL32(Very high)	OCL6(Very high)	1	1	1	0	0	1	0	0	0	0	0
GCF_002143885	973	New Oxford ST	IC9			Unknown	Unknown	Unknown	3	5	KL23(Very high)	OCL13(Perfect)	1	0	1	0	0	0	0	0	0	0	0
GCF_002143935	2	208	IC2	2.3	2.3.2	Unknown	Unknown	Unknown	6	14	KL2(Very high)	OCL1(Very high)	1	1	1	0	1	1	0	0	0	0	1
GCF_002143955	216	New Oxford ST				Unknown	Unknown	Unknown	2	4	KL9(Very high)	OCL5(Very high)	1	0	0	0	0	0	0	0	0	0	0
GCF_002143965	1	207	IC1	1.4	1.4.9	Unknown	Unknown	Unknown	7	18	KL4(Perfect)	OCL3(Perfect)	1	1	1	0	1	1	0	0	0	0	1
GCF_002143975	25	993	IC7			Unknown	Unknown	Unknown	6	15	KL12(Very high)	OCL5(Very high)	1	1	1	0	0	1	0	0	0	0	1
GCF_002144685	2	350	IC2	2.2	2.2.5	Unknown	Unknown	Unknown	7	17	KL9(Very high)	OCL1(Good)	1	1	1	0	1	1	1	0	0	0	1
GCF_002144695	250	1739				Unknown	Unknown	Unknown	5	11	KL155(Very high)	OCL1(Very high)	1	0	0	0	0	1	1	0	0	0	0
GCF_002144725	2	208	IC2	2.4	2.4.2	Unknown	Unknown	Unknown	8	22	KL2(Good)	OCL1(Very high)	1	1	1	0	1	1	1	0	0	0	1
GCF_002144755	2	208	IC2	2.3	2.3.2	Unknown	Unknown	Unknown	6	15	KL2(Very high)	OCL1(Very high)	1	1	1	0	1	1	0	0	0	0	1
GCF_002144765	250	1739				Unknown	Unknown	Unknown	3	8	KL155(Very high)	OCL1(Very high)	1	0	0	0	0	0	0	0	0	0	0
GCF_002144795	412	New Oxford ST				Unknown	Unknown	Unknown	4	9	KL23(Very high)	OCL6(Very high)	1	0	1	0	0	1	0	0	0	0	0
GCF_002144805	150	718				Unknown	Unknown	Unknown	3	5	KL81(Good)	OCL6(Very high)	1	0	1	0	0	0	0	0	0	0	0
GCF_002144835	49	128				Unknown	Unknown	Unknown	2	4	KL11(Very high)	OCL8(Very high)	1	0	0	0	0	0	0	0	0	0	0
GCF_002144925	79	124	IC5			Unknown	Unknown	Unknown	5	17	KL151(Good)	OCL1(Very high)	1	0	1	0	0	1	0	0	0	0	1
GCF_002144955	32	823				Unknown	Unknown	Unknown	2	4	KL2(Very high)	OCL6(Very high)	1	0	0	0	0	0	0	0	0	0	0
GCF_002144965	10	447	IC8			Unknown	Unknown	Unknown	4	10	KL49(Very high)	OCL2(Very high)	1	0	1	0	0	0	0	0	0	0	1
GCF_002144975	2	281	IC2	2.2	2.2.4	Unknown	Unknown	Unknown	4	11	KL22(Very high)	OCL3(Low)	1	0	0	0	1	1	0	0	0	0	1
GCF_002144995	221	1728				Unknown	Unknown	Unknown	3	5	KL14(High)	OCL6(Very high)	1	0	1	0	0	0	0	0	0	0	0
GCF_002145035	2	417	IC2	2.3	2.3.2	Unknown	Unknown	Unknown	6	15	KL23(Very high)	OCL1(Very high)	1	1	1	0	1	1	0	0	0	0	1
GCF_002145055	2	208	IC2	2.4	2.4.2	Unknown	Unknown	Unknown	8	24	KL2(Very high)	OCL1(Very high)	1	1	1	0	1	1	1	0	0	0	1
GCF_002145065	2	New Oxford ST	IC2	2.4	2.4.2	Unknown	Unknown	Unknown	6	16	KL2(Very high)	OCL1(Very high)	1	1	1	0	1	0	1	0	0	0	1
GCF_002145095	250	1739				Unknown	Unknown	Unknown	5	11	KL155(Very high)	OCL1(Very high)	1	0	0	0	0	1	1	0	0	0	0
GCF_002145115	2	417	IC2	2.3	2.3.2	Unknown	Unknown	Unknown	7	19	KL23(Very high)	OCL1(Very high)	1	1	1	0	1	1	1	0	0	0	1
GCF_002145125	1088	1703				Unknown	Unknown	Unknown	4	9	KL9(Very high)	OCL1(Very high)	1	0	1	0	0	0	0	0	0	0	0
GCF_002145155	New Pasteur ST	New Oxford ST				Unknown	Unknown	Unknown	2	4	KL20(Very high)	OCL22(Perfect)	1	0	0	0	0	0	0	0	0	0	0
GCF_002145175	2	350	IC2	2.2	2.2.5	Unknown	Unknown	Unknown	7	18	KL9(Very high)	OCL1(Good)	1	1	1	0	1	1	1	0	0	0	1
GCF_002145195	2	208	IC2	2.4	2.4.12	Unknown	Unknown	Unknown	8	21	KL152(Good)	OCL1(Very high)	1	1	1	0	1	1	1	0	0	0	1
GCF_002145255	85	1078	IC9			Unknown	Unknown	Unknown	4	7	KL81(Good)	OCL6(Very high)	1	0	1	0	0	0	0	0	0	0	1
GCF_002145295	New Pasteur ST	New Oxford ST				Unknown	Unknown	Unknown	3	5	KL6(Very high)	OCL5(Very high)	1	0	1	0	0	0	0	0	0	0	0
GCF_002145375	10	447	IC8			Unknown	Unknown	Unknown	6	11	KL49(Very high)	OCL2(Very high)	1	1	1	0	0	1	0	0	0	0	1
GCF_002145395	505	New Oxford ST				Unknown	Unknown	Unknown	2	3	KL176(Perfect)	OCL5(Good)	1	0	0	0	0	0	0	0	0	0	0
GCF_002145435	2	350	IC2	2.2	2.2.5	Unknown	Unknown	Unknown	7	22	KL9(Very high)	OCL1(Good)	1	1	1	0	1	1	1	0	0	0	1
GCF_002148725	2	208	IC2	2.4	2.4.2	Unknown	Unknown	Unknown	8	21	KL2(Very high)	OCL1(Very high)	1	1	1	0	1	1	1	0	0	0	1
GCF_002148735	11	1002				Unknown	Unknown	Unknown	3	5	KL46(Very high)	OCL1(High)	1	0	1	0	0	0	0	0	0	0	0
GCF_002148745	1165	New Oxford ST				Unknown	Unknown	Unknown	2	4	KL227(Perfect)	OCL4(Very high)	0	0	1	0	0	0	0	0	0	0	0
GCF_002150405	3	106	IC3			2013	Turkey	Asia	5	11	KL1(Good)	OCL1(Very high)	1	0	1	0	0	1	0	0	0	0	1
GCF_002150485	1	231	IC1	1.4	1.4.0	2013	Turkey	Asia	7	16	KL1(Low)	OCL1(Perfect)	1	1	1	0	1	1	0	1	0	0	0
GCF_002154155	187	281	IC2	2.2	2.2.4	2012	Tunisia	Africa	4	12	KL22(Very high)	OCL7(Very high)	1	0	1	0	1	0	0	0	0	0	1
GCF_002154215	2	281	IC2	2.2	2.2.4	2012	Tunisia	Africa	4	11	KL22(None)	OCL7(Very high)	1	0	1	0	1	0	0	0	0	0	1
GCF_002017475	2	208	IC2	2.4	2.4.2	2011	United States	North America	6	15	KL2(Very high)	OCL1(Very high)	1	1	1	0	1	1	0	0	0	0	1
GCF_002017485	10	447	IC8			2011	United States	North America	6	11	KL49(Very high)	OCL2(Very high)	1	1	1	0	0	1	0	0	0	0	1
GCF_002017515	2	350	IC2	2.2	2.2.5	2011	United States	North America	6	15	KL9(Very high)	OCL1(Good)	1	1	1	0	1	1	0	0	0	0	1
GCF_002017525	2	208	IC2	2.4	2.4.2	2011	United States	North America	6	15	KL2(Very high)	OCL1(Very high)	1	1	1	0	1	1	0	0	0	0	1
GCF_002017555	2	417	IC2	2.3	2.3.2	2012	United States	North America	6	14	KL23(Very high)	OCL1(Very high)	1	1	1	0	1	1	0	0	0	0	1
GCF_002017565	1088	1703				2012	United States	North America	5	10	KL9(Very high)	OCL1(Very high)	1	0	1	0	0	1	0	0	0	0	0
GCF_002017595	1088	1703				2012	United States	North America	5	11	KL9(Very high)	OCL1(Very high)	1	0	1	0	0	1	0	0	0	0	0
GCF_002017605	2	New Oxford ST	IC2	2.2	2.2.5	2012	United States	North America	6	15	KL2(Good)	OCL1(Good)	1	1	1	0	1	1	0	0	0	0	1
GCF_002017615	2	281	IC2	2.2	2.2.4	2012	United States	North America	4	12	KL22(Very high)	OCL3(Low)	1	0	0	0	1	1	0	0	0	0	1
GCF_002017625	2	417	IC2	2.3	2.3.2	2012	United States	North America	6	14	KL23(Very high)	OCL1(Very high)	1	1	1	0	1	1	0	0	0	0	1
GCF_002017675	2	208	IC2	2.4	2.4.2	2012	United States	North America	5	12	KL2(Very high)	OCL1(Very high)	1	1	1	0	1	0	0	0	0	0	1
GCF_002017685	2	208	IC2	2.4	2.4.2	2009	United States	North America	6	14	KL2(Very high)	OCL1(Very high)	1	1	1	0	1	1	0	0	0	0	1
GCF_002017705	2	350	IC2	2.2	2.2.5	2010	United States	North America	6	15	KL9(Very high)	OCL1(Good)	1	1	1	0	1	1	0	0	0	0	1
GCF_002017735	2	350	IC2	2.2	2.2.5	2010	United States	North America	6	15	KL9(Very high)	OCL1(Good)	1	1	1	0	1	1	0	0	0	0	1
GCF_002017745	2	350	IC2	2.2	2.2.5	2011	United States	North America	6	14	KL9(Very high)	OCL1(Good)	1	1	1	0	1	1	0	0	0	0	1
GCF_002017765	2	208	IC2	2.3	2.3.2	2011	United States	North America	6	16	KL2(Very high)	OCL1(Very high)	1	1	1	0	1	1	0	0	0	0	1
GCF_002017795	2	350	IC2	2.2	2.2.5	2010	United States	North America	6	15	KL9(Very high)	OCL1(Good)	1	1	1	0	1	1	0	0	0	0	1
GCF_002017805	941	1451				2011	United States	North America	3	5	KL29(Very high)	OCL8(Very high)	1	0	1	0	0	0	0	0	0	0	0
GCF_002028445	2	208	IC2	2.4	2.4.2	2009	United States	North America	8	22	KL2(Very high)	OCL1(Very high)	1	1	1	0	1	1	1	0	0	0	1
GCF_002028475	2	208	IC2	2.4	2.4.2	2009	United States	North America	8	22	KL2(Very high)	OCL1(Very high)	1	1	1	0	1	1	1	0	0	0	1
GCF_002028485	2	208	IC2	2.3	2.3.2	2009	United States	North America	6	17	KL2(Very high)	OCL1(Very high)	1	1	1	0	1	1	0	0	0	0	1
GCF_002028535	2	208	IC2	2.4	2.4.2	2009	United States	North America	8	22	KL2(Very high)	OCL1(Very high)	1	1	1	0	1	1	1	0	0	0	1
GCF_002116925	52	931				2015	United States	North America	4	6	KL3(Very high)	OCL1(Very high)	1	0	1	0	0	1	0	0	0	0	0
GCF_002182345	79	124	IC5			2011	United States	North America	5	17	KL151(Very high)	OCL10(Good)	1	0	1	0	1	1	0	0	0	0	1
GCF_002182365	2	208	IC2	2.4	2.4.2	2011	United States	North America	8	22	KL2(Very high)	OCL1(Very high)	1	1	1	0	1	1	1	0	0	0	1
GCF_002182385	2	1701	IC2	2.2	2.2.5	2011	United States	North America	6	15	KL124(Perfect)	OCL1(Good)	1	1	1	0	1	1	0	0	0	0	1
GCF_002182405	10	447	IC8			2011	United States	North America	4	10	KL49(Perfect)	OCL2(Very high)	1	0	1	0	0	0	0	0	0	0	1
GCF_002182425	2	208	IC2	2.4	2.4.2	2011	United States	North America	8	20	KL2(Very high)	OCL1(Very high)	1	1	1	0	1	1	1	0	0	0	1
GCF_002182445	2	281	IC2	2.2	2.2.4	2011	United States	North America	4	12	KL22(Very high)	OCL3(Low)	1	0	0	0	1	1	0	0	0	0	1
GCF_002182465	221	1728				2011	United States	North America	3	5	KL14(High)	OCL6(Very high)	1	0	1	0	0	0	0	0	0	0	0
GCF_002182485	1088	1703				2011	United States	North America	7	17	KL9(Very high)	OCL1(Very high)	1	0	1	0	0	1	1	0	0	0	0
GCF_002182505	2	208	IC2	2.4	2.4.2	2009	United States	North America	8	23	KL2(Very high)	OCL1(Very high)	1	1	1	0	1	1	1	0	0	0	1
GCF_002182545	2	208	IC2	2.4	2.4.12	2009	United States	North America	8	21	KL2(Very high)	OCL1(Very high)	1	1	1	0	1	1	1	0	0	0	1
GCF_002182605	2	208	IC2	2.4	2.4.12	2009	United States	North America	8	19	KL2(Very high)	OCL1(Very high)	1	1	1	0	1	1	1	0	0	0	1
GCF_002182615	2	208	IC2	2.4	2.4.2	2009	United States	North America	8	20	KL2(Good)	OCL1(Very high)	1	1	1	0	1	1	1	0	0	0	1
GCF_002182625	2	350	IC2	2.2	2.2.5	2009	United States	North America	7	18	KL9(Very high)	OCL1(Good)	1	1	1	0	1	1	1	0	0	0	1
GCF_002182645	2	208	IC2	2.4	2.4.2	2009	United States	North America	8	21	KL2(Very high)	OCL1(Very high)	1	1	1	0	1	1	1	0	0	0	1
GCF_002182685	79	124	IC5			2009	United States	North America	5	17	KL152(Good)	OCL10(Good)	1	0	1	0	0	1	0	0	0	0	1
GCF_002182695	2	350	IC2	2.2	2.2.5	2009	United States	North America	7	17	KL9(Good)	OCL1(Good)	1	1	1	0	1	1	1	0	0	0	1
GCF_002182705	2	350	IC2	2.2	2.2.5	2009	United States	North America	7	18	KL9(Very high)	OCL1(Good)	1	1	1	0	1	1	1	0	0	0	1
GCF_002182725	2	350	IC2	2.2	2.2.5	2009	United States	North America	7	18	KL9(Very high)	OCL1(Good)	1	1	1	0	1	1	1	0	0	0	1
GCF_002182765	2	208	IC2	2.4	2.4.2	2009	United States	North America	6	17	KL2(Very high)	OCL1(Very high)	1	1	1	0	1	0	1	0	0	0	1
GCF_002182785	2	350	IC2	2.2	2.2.5	2009	United States	North America	7	18	KL9(Very high)	OCL1(Good)	1	1	1	0	1	1	1	0	0	0	1
GCF_002182795	2	350	IC2	2.2	2.2.5	2009	United States	North America	7	18	KL9(Very high)	OCL1(Good)	1	1	1	0	1	1	1	0	0	0	1
GCF_002182805	2	350	IC2	2.2	2.2.5	2010	United States	North America	7	18	KL9(Very high)	OCL1(Good)	1	1	1	0	1	1	1	0	0	0	1
GCF_002182845	2	350	IC2	2.2	2.2.5	2010	United States	North America	7	18	KL9(Very high)	OCL1(Good)	1	1	1	0	1	1	1	0	0	0	1
GCF_002182865	2	208	IC2	2.4	2.4.2	2010	United States	North America	8	22	KL2(Very high)	OCL1(Very high)	1	1	1	0	1	1	1	0	0	0	1
GCF_002182875	2	208	IC2	2.4	2.4.2	2009	United States	North America	8	22	KL2(Very high)	OCL1(Very high)	1	1	1	0	1	1	1	0	0	0	1
GCF_002182895	2	208	IC2	2.3	2.3.2	2009	United States	North America	6	17	KL2(Very high)	OCL1(Very high)	1	1	1	0	1	1	0	0	0	0	1
GCF_002182925	2	350	IC2	2.2	2.2.5	2009	United States	North America	6	14	KL9(Very high)	OCL1(Good)	1	1	1	0	1	1	0	0	0	0	1
GCF_002182945	79	124	IC5			2009	United States	North America	5	15	KL152(Good)	OCL1(Very high)	1	0	1	0	1	1	0	0	0	0	1
GCF_002182955	2	208	IC2	2.4	2.4.12	2009	United States	North America	8	19	KL2(Very high)	OCL1(Very high)	1	1	1	0	1	1	1	0	0	0	1
GCF_002182965	2	208	IC2	2.4	2.4.2	2009	United States	North America	8	21	KL2(Very high)	OCL1(Very high)	1	1	1	0	1	1	1	0	0	0	1
GCF_002183005	250	1739				2013	United States	North America	5	11	KL155(Very high)	OCL1(Very high)	1	0	0	0	0	1	1	0	0	0	0
GCF_002183025	2	208	IC2	2.4	2.4.2	2013	United States	North America	8	21	KL2(Very high)	OCL1(Very high)	1	1	1	0	1	1	1	0	0	0	1
GCF_002183035	2	350	IC2	2.2	2.2.5	2013	United States	North America	7	18	KL9(Very high)	OCL1(Good)	1	1	1	0	1	1	1	0	0	0	1
GCF_002183045	250	New Oxford ST				2013	United States	North America	5	12	KL22(Very high)	OCL1(Very high)	1	1	0	0	1	1	0	0	0	0	0
GCF_002183085	2	281	IC2	2.2	2.2.4	2013	United States	North America	5	13	KL22(Very high)	OCL3(Good)	1	0	1	0	1	1	0	0	0	0	1
GCF_002183105	250	New Oxford ST				2013	United States	North America	5	10	KL22(Very high)	OCL1(Very high)	1	1	0	0	0	1	0	0	0	0	0
GCF_002183115	2	281	IC2	2.2	2.2.4	2013	United States	North America	4	11	KL22(Very high)	OCL3(Low)	1	0	0	0	1	1	0	0	0	0	1
GCF_002183125	250	New Oxford ST				2013	United States	North America	5	10	KL22(Very high)	OCL1(Very high)	1	1	0	0	0	1	0	0	0	0	0
GCF_002183165	2	281	IC2	2.2	2.2.4	2013	United States	North America	5	13	KL22(None)	OCL3(Good)	1	0	1	0	1	1	0	0	0	0	1
GCF_002183185	2	208	IC2	2.3	2.3.2	2013	United States	North America	6	15	KL2(Very high)	OCL1(Very high)	1	1	1	0	1	1	0	0	0	0	1
GCF_002183195	2	473	IC2	2.4	2.4.2	2013	United States	North America	6	15	KL3(Very high)	OCL1(Very high)	1	1	1	0	1	1	0	0	0	0	1
GCF_002183215	2	208	IC2	2.4	2.4.2	2013	United States	North America	6	15	KL2(Very high)	OCL1(Very high)	1	1	1	0	1	1	0	0	0	0	1
GCF_002183245	2	208	IC2	2.4	2.4.2	2013	United States	North America	6	15	KL2(Very high)	OCL1(Very high)	1	1	1	0	1	1	0	0	0	0	1
GCF_002183265	2	281	IC2	2.2	2.2.4	2012	United States	North America	4	11	KL22(Very high)	OCL3(Low)	1	0	0	0	1	1	0	0	0	0	1
GCF_002183275	2	New Oxford ST	IC2	2.4	2.4.2	2012	United States	North America	5	14	KL2(Very high)	OCL1(Very high)	1	1	1	0	1	0	0	0	0	0	1
GCF_002183285	2	281	IC2	2.2	2.2.4	2012	United States	North America	4	12	KL22(Very high)	OCL3(Low)	1	0	0	0	1	1	0	0	0	0	1
GCF_002183325	2	New Oxford ST	IC2	2.4	2.4.2	2012	United States	North America	6	16	KL2(Very high)	OCL1(Very high)	1	1	1	0	1	0	1	0	0	0	1
GCF_002183345	2	417	IC2	2.3	2.3.2	2012	United States	North America	7	18	KL23(Good)	OCL1(Very high)	1	1	1	0	1	1	1	0	0	0	1
GCF_002183355	2	208	IC2	2.4	2.4.2	2012	United States	North America	8	23	KL2(Very high)	OCL1(Very high)	1	1	1	0	1	1	1	0	0	0	1
GCF_002183365	2	208	IC2	2.3	2.3.2	2012	United States	North America	7	16	KL2(Very high)	OCL1(Very high)	1	1	1	0	1	1	1	0	0	0	1
GCF_002183405	2	350	IC2	2.2	2.2.5	2012	United States	North America	7	17	KL9(Very high)	OCL1(Good)	1	1	1	0	1	1	1	0	0	0	1
GCF_002183425	250	1739				2012	United States	North America	5	11	KL155(Very high)	OCL1(Very high)	1	0	0	0	0	1	1	0	0	0	0
GCF_002183435	2	281	IC2	2.2	2.2.4	2012	United States	North America	5	13	KL22(Very high)	OCL3(Good)	1	0	1	0	1	1	0	0	0	0	1
GCF_002183445	2	417	IC2	2.3	2.3.2	2012	United States	North America	7	18	KL23(Very high)	OCL1(Very high)	1	1	1	0	1	1	1	0	0	0	1
GCF_002183485	2	208	IC2	2.4	2.4.2	2011	United States	North America	8	21	KL2(Very high)	OCL1(Very high)	1	1	1	0	1	1	1	0	0	0	1
GCF_002183505	79	124	IC5			2011	United States	North America	7	20	KL151(Good)	OCL10(Good)	1	0	1	0	1	1	1	0	0	0	1
GCF_002183515	3	106	IC3			2011	United States	North America	5	10	KL1(Very high)	OCL1(Very high)	1	0	1	0	1	1	0	0	0	0	1
GCF_002183545	2	208	IC2	2.4	2.4.2	2011	United States	North America	8	22	KL2(Very high)	OCL1(Very high)	1	1	1	0	1	1	1	0	0	0	1
GCF_002183555	2	208	IC2	2.4	2.4.2	2011	United States	North America	8	22	KL2(Very high)	OCL1(Very high)	1	1	1	0	1	1	1	0	0	0	1
GCF_002183585	2	208	IC2	2.4	2.4.2	2011	United States	North America	8	22	KL2(Very high)	OCL1(Very high)	1	1	1	0	1	1	1	0	0	0	1
GCF_002183595	2	281	IC2	2.2	2.2.4	2011	United States	North America	4	12	KL22(Very high)	OCL3(Low)	1	0	0	0	1	1	0	0	0	0	1
GCF_002183625	2	350	IC2	2.2	2.2.5	2011	United States	North America	7	18	KL9(Very high)	OCL1(Good)	1	1	1	0	1	1	1	0	0	0	1
GCF_002183635	2	208	IC2	2.4	2.4.12	2009	United States	North America	8	19	KL2(Very high)	OCL1(Very high)	1	1	1	0	1	1	1	0	0	0	1
GCF_002183665	2	208	IC2	2.4	2.4.2	2009	United States	North America	8	22	KL2(Good)	OCL1(Very high)	1	1	1	0	1	1	1	0	0	0	1
GCF_002183675	48	New Oxford ST				2009	United States	North America	2	4	KL19(Very high)	OCL1(Very high)	1	0	0	0	0	0	0	0	0	0	0
GCF_002183705	2	350	IC2	2.2	2.2.5	2009	United States	North America	7	18	KL9(Very high)	OCL1(Good)	1	1	1	0	1	1	1	0	0	0	1
GCF_002183725	2	350	IC2	2.2	2.2.5	2009	United States	North America	7	18	KL9(Very high)	OCL1(Good)	1	1	1	0	1	1	1	0	0	0	1
GCF_002183735	2	New Oxford ST	IC2	2.4	2.4.2	2009	United States	North America	8	21	KL2(Very high)	OCL1(Very high)	1	1	1	0	1	1	1	0	0	0	1
GCF_002183765	2	208	IC2	2.4	2.4.2	2009	United States	North America	8	22	KL2(Very high)	OCL1(Very high)	1	1	1	0	1	1	1	0	0	0	1
GCF_002183785	2	208	IC2	2.3	2.3.2	2009	United States	North America	6	17	KL2(Very high)	OCL1(Very high)	1	1	1	0	1	1	0	0	0	0	1
GCF_002183805	2	350	IC2	2.2	2.2.5	2009	United States	North America	7	18	KL9(Very high)	OCL1(Good)	1	1	1	0	1	1	1	0	0	0	1
GCF_002183815	2	208	IC2	2.4	2.4.2	2009	United States	North America	5	12	KL2(Very high)	OCL1(Very high)	1	1	1	0	1	0	0	0	0	0	1
GCF_002197745	622	919				2017	United Kingdom	Europe	9	22	KL22(Good)	OCL5(Perfect)	1	0	1	0	0	1	1	0	0	0	0
GCF_002210065	1	781	IC1	1.4	1.4.9	2003	Australia	Oceania	8	19	KL15(Perfect)	OCL3(Perfect)	1	1	1	0	1	1	0	1	0	0	1
GCF_002212105	New Pasteur ST	New Oxford ST	IC2	2.3	2.3.2	2013	Saudi Arabia	Asia	6	12	KL4(None)	OCL1(Very high)	1	1	1	0	1	0	1	0	0	0	1
GCF_002212115	2	1286	IC2	2.3	2.3.2	2013	Saudi Arabia	Asia	5	9	KL4(None)	OCL11(None)	1	1	1	0	0	0	0	0	0	0	1
GCF_002212145	New Pasteur ST	1286	IC2	2.3	2.3.2	2013	Saudi Arabia	Asia	7	17	KL4(None)	OCL11(Good)	1	1	1	0	0	1	1	0	0	0	1
GCF_002212155	New Pasteur ST	1286	IC2	2.3	2.3.2	2013	Saudi Arabia	Asia	7	25	KL4(None)	OCL1(None)	1	1	1	0	0	1	1	0	0	0	1
GCF_002212165	2	1286	IC2	2.3	2.3.2	2013	Saudi Arabia	Asia	7	39	KL4(Good)	OCL1(Very high)	1	1	1	0	1	1	1	0	0	0	1
GCF_002212225	113	884				2013	Saudi Arabia	Asia	5	12	KL80(None)	OCL13(None)	1	0	1	0	0	1	0	0	0	0	0
GCF_002212235	2	1816	IC2	2.5	2.5.6	2014	Saudi Arabia	Asia	5	13	KL150(None)	OCL1(None)	1	0	1	0	1	0	1	0	0	0	1
GCF_002212245	2	195	IC2	2.5	2.5.6	2013	Saudi Arabia	Asia	8	19	KL3(Good)	OCL1(Very high)	1	1	1	0	1	1	1	0	0	0	1
GCF_002212285	2	557	IC2	2.4	2.4.1	2013	Saudi Arabia	Asia	5	13	KL152(Good)	OCL1(Very high)	1	1	1	0	1	0	0	0	0	0	1
GCF_002212305	2	195	IC2	2.5	2.5.6	2013	Saudi Arabia	Asia	5	15	KL3(Good)	OCL1(Good)	1	1	1	0	1	0	0	0	0	0	1
GCF_002212315	2	195	IC2	2.5	2.5.6	2013	Saudi Arabia	Asia	8	19	KL3(None)	OCL11(None)	1	1	1	0	1	1	1	0	0	0	1
GCF_002212325	New Pasteur ST	195	IC2	2.5	2.5.6	2013	Saudi Arabia	Asia	7	18	KL3(High)	OCL1(Very high)	1	1	1	0	1	0	1	0	0	0	1
GCF_002212365	2	195	IC2	2.5	2.5.6	2013	Saudi Arabia	Asia	8	20	KL3(Good)	OCL1(Very high)	1	1	1	0	1	1	1	0	0	0	1
GCF_002212385	2	New Oxford ST	IC2	2.5	2.5.6	2014	Saudi Arabia	Asia	5	11	KL9(Low)	OCL1(None)	1	0	1	0	1	0	1	0	0	0	1
GCF_002212405	2	218	IC2	2.5	2.5.6	2014	Saudi Arabia	Asia	5	15	KL9(None)	OCL1(None)	1	1	1	0	1	0	0	0	0	0	1
GCF_002212445	2	195	IC2	2.5	2.5.6	2014	Saudi Arabia	Asia	6	16	KL3(Very high)	OCL1(Very high)	1	1	1	0	1	0	1	0	0	0	1
GCF_002212465	2	195	IC2	2.5	2.5.6	2012	Saudi Arabia	Asia	8	23	KL3(Very high)	OCL1(Very high)	1	1	1	0	1	1	1	0	0	0	1
GCF_002212485	2	195	IC2	2.5	2.5.6	2013	Saudi Arabia	Asia	8	21	KL3(Good)	OCL1(Very high)	1	1	1	0	1	1	1	0	0	0	1
GCF_002212525	2	195	IC2	2.5	2.5.6	2013	Saudi Arabia	Asia	8	22	KL3(Very high)	OCL1(Very high)	1	1	1	0	1	1	1	0	0	0	1
GCF_002212535	2	218	IC2	2.5	2.5.6	2014	Saudi Arabia	Asia	6	15	KL9(None)	OCL1(Low)	1	1	1	0	0	0	1	0	0	0	1
GCF_002212565	2	195	IC2	2.5	2.5.6	2013	Saudi Arabia	Asia	6	13	KL3(Good)	OCL1(Very high)	1	1	1	0	1	0	1	0	0	0	1
GCF_002212605	2	195	IC2	2.5	2.5.6	2013	Saudi Arabia	Asia	8	22	KL3(Good)	OCL1(Very high)	1	1	1	0	1	1	1	0	0	0	1
GCF_002212625	2	557	IC2	2.4	2.4.1	2013	Saudi Arabia	Asia	7	17	KL152(Good)	OCL1(Good)	1	1	1	0	1	1	1	0	0	0	1
GCF_002212635	2	New Oxford ST	IC2	2.4	2.4.1	2013	Saudi Arabia	Asia	6	19	KL213(None)	OCL1(Very high)	1	1	1	0	1	0	1	0	0	0	1
GCF_002212645	1723	New Oxford ST	IC2	2.5	2.5.6	2013	Saudi Arabia	Asia	8	19	KL3(Very high)	OCL1(Very high)	1	1	1	0	1	1	1	0	0	0	1
GCF_002212685	2	281	IC2	2.3	2.3.2	2013	Saudi Arabia	Asia	6	17	KL22(Good)	OCL1(Good)	1	1	1	0	1	1	0	0	0	0	1
GCF_002212705	2	195	IC2	2.5	2.5.6	2013	Saudi Arabia	Asia	8	20	KL3(High)	OCL1(Very high)	1	1	1	0	1	1	1	0	0	0	1
GCF_002212715	2	281	IC2	2.3	2.3.2	2013	Saudi Arabia	Asia	6	13	KL22(Good)	OCL1(Very high)	1	1	1	0	1	1	0	0	0	0	1
GCF_002237955	2	208	IC2	2.4	2.4.2	2013	South Korea	Asia	6	19	KL2(High)	OCL1(Very high)	1	0	1	0	1	1	1	0	0	0	1
GCF_002238075	2	556	IC2	2.2	2.2.6	2013	Cote d'Ivoire	Africa	8	25	KL42(Good)	OCL1(Good)	1	1	1	0	1	1	1	0	0	0	1
GCF_002239725	16	355				2016	Thailand	Asia	6	10	KL24(Very high)	OCL7(High)	1	1	1	0	0	0	0	0	0	0	0
GCF_002239735	2	451	IC2	2.5	2.5.6	2016	Thailand	Asia	6	16	KL6(Very high)	OCL1(Very high)	1	1	1	0	1	1	0	0	0	0	1
GCF_002239865	2	208	IC2	2.5	2.5.6	2016	Thailand	Asia	7	18	KL2(Very high)	OCL1(Good)	1	1	1	0	1	1	1	0	0	0	1
GCF_002239885	2	1933	IC2	2.5	2.5.6	2016	Thailand	Asia	7	18	KL10(Very high)	OCL1(Very high)	1	1	1	0	1	1	1	0	0	0	1
GCF_002241095	New Pasteur ST	195	IC2	2.5	2.5.6	2012	Saudi Arabia	Asia	8	21	KL3(Low)	OCL1(Good)	1	1	1	0	1	1	1	0	0	0	1
GCF_002241105	2	195	IC2	2.5	2.5.6	2012	Saudi Arabia	Asia	8	21	KL3(Good)	OCL1(Very high)	1	1	1	0	1	1	1	0	0	0	1
GCF_002245595	1	231	IC1	1.4	1.4.5	2012	Brazil	South America	4	11	KL1(None)	OCL1(Perfect)	1	0	1	0	0	0	0	0	0	0	1
GCF_002245665	1	405	IC1	1.4	1.4.5	2011	Brazil	South America	6	14	KL18(None)	OCL1(Perfect)	1	0	1	0	0	1	0	0	0	0	1
GCF_002249135	2	451	IC2	2.5	2.5.6	2016	Thailand	Asia	7	19	KL6(Very high)	OCL1(Very high)	1	1	1	0	1	1	1	0	0	0	1
GCF_002249185	2	451	IC2	2.5	2.5.6	2016	Thailand	Asia	7	19	KL6(Very high)	OCL1(Very high)	1	1	1	0	1	1	1	0	0	0	1
GCF_002249225	2	368	IC2	2.5	2.5.6	2016	Thailand	Asia	7	17	KL52(Very high)	OCL1(Very high)	1	1	1	0	1	1	1	0	0	0	1
GCF_002249245	2	451	IC2	2.5	2.5.6	2016	Thailand	Asia	7	19	KL6(Very high)	OCL1(Very high)	1	1	1	0	1	1	1	0	0	0	1
GCF_002249255	2	1933	IC2	2.5	2.5.6	2016	Thailand	Asia	6	17	KL10(Very high)	OCL1(Very high)	1	1	1	0	1	0	1	0	0	0	1
GCF_002249265	2	368	IC2	2.5	2.5.6	2016	Thailand	Asia	7	17	KL52(Very high)	OCL1(Very high)	1	1	1	0	1	1	1	0	0	0	1
GCF_002249305	2	1933	IC2	2.5	2.5.6	2016	Thailand	Asia	7	18	KL10(Very high)	OCL1(Very high)	1	1	1	0	1	1	1	0	0	0	1
GCF_002249325	2	1933	IC2	2.5	2.5.6	2016	Thailand	Asia	7	18	KL10(Very high)	OCL1(Very high)	1	1	1	0	1	1	1	0	0	0	1
GCF_002249335	2	208	IC2	2.5	2.5.6	2016	Thailand	Asia	7	19	KL2(Very high)	OCL1(Good)	1	1	1	0	1	1	1	0	0	0	1
GCF_002249365	215	806	IC2	2.4	2.4.14	2016	Thailand	Asia	8	20	KL10(Very high)	OCL5(Very high)	1	1	1	0	1	1	1	0	0	0	1
GCF_002249385	2	1933	IC2	2.5	2.5.6	2016	Thailand	Asia	7	18	KL10(Very high)	OCL1(Very high)	1	1	1	0	1	1	1	0	0	0	1
GCF_002249405	2	451	IC2	2.5	2.5.6	2016	Thailand	Asia	6	18	KL6(Very high)	OCL1(Very high)	1	1	1	0	1	0	1	0	0	0	1
GCF_002249425	2	208	IC2	2.5	2.5.6	2016	Thailand	Asia	7	18	KL2(Very high)	OCL1(Good)	1	1	1	0	1	1	1	0	0	0	1
GCF_002249435	215	1499	IC2	2.4	2.4.14	2016	Thailand	Asia	8	20	KL45(High)	OCL5(Very high)	1	1	1	0	1	1	1	0	0	0	1
GCF_002249465	2	208	IC2	2.5	2.5.6	2016	Thailand	Asia	7	18	KL2(Very high)	OCL1(Good)	1	1	1	0	1	1	1	0	0	0	1
GCF_002249475	571	795	IC2	2.4	2.4.15	2016	Thailand	Asia	4	10	KL49(Very high)	OCL1(Very high)	1	0	1	0	1	0	0	0	0	0	1
GCF_002249505	2	208	IC2	2.5	2.5.6	2016	Thailand	Asia	7	19	KL2(Very high)	OCL1(Good)	1	1	1	0	1	1	1	0	0	0	1
GCF_002249525	2	451	IC2	2.5	2.5.6	2016	Thailand	Asia	7	19	KL6(Very high)	OCL1(Very high)	1	1	1	0	1	1	1	0	0	0	1
GCF_002249545	2	1933	IC2	2.5	2.5.6	2016	Thailand	Asia	7	17	KL10(Very high)	OCL1(Very high)	1	1	1	0	1	1	1	0	0	0	1
GCF_002249585	2	1933	IC2	2.5	2.5.6	2016	Thailand	Asia	7	18	KL10(Very high)	OCL1(Very high)	1	1	1	0	1	1	1	0	0	0	1
GCF_002249605	2	451	IC2	2.5	2.5.6	2016	Thailand	Asia	7	18	KL6(Very high)	OCL1(Very high)	1	1	1	0	1	1	1	0	0	0	1
GCF_002249655	2	208	IC2	2.5	2.5.6	2016	Thailand	Asia	7	18	KL2(Very high)	OCL1(Good)	1	1	1	0	1	1	1	0	0	0	1
GCF_002250465	730	783	IC5			2014	Brazil	South America	8	19	KL33(Very high)	OCL10(Good)	1	0	1	0	1	1	0	1	0	0	1
GCF_002261505	2	195	IC2	2.5	2.5.6	2013	Iran	Asia	7	20	KL3(None)	OCL1(Good)	1	1	1	0	1	1	1	0	0	0	1
GCF_002261535	307	440	IC7			2013	Iran	Asia	6	15	KL130(None)	OCL1(Good)	1	0	1	0	0	1	1	0	0	0	1
GCF_002265555	49	128				2015	India	Asia	2	4	KL11(Very high)	OCL8(Very high)	1	0	0	0	0	0	0	0	0	0	0
GCF_002265675	2	195	IC2	2.5	2.5.6	2015	India	Asia	6	18	KL3(Very high)	OCL1(Very high)	1	1	1	0	1	0	1	0	0	0	1
GCF_002277145	2	208	IC2	2.4	2.4.13	2015	China	Asia	6	19	KL2(Very high)	OCL1(Very high)	1	1	1	0	1	1	0	0	0	0	1
GCF_002277175	2	208	IC2	2.4	2.4.13	2015	China	Asia	8	21	KL28(Low)	OCL1(Very high)	1	1	1	0	1	1	1	0	0	0	1
GCF_002277185	2	208	IC2	2.4	2.4.13	2015	China	Asia	8	21	KL28(None)	OCL1(Good)	1	1	1	0	1	1	1	0	0	0	1
GCF_002277215	2	208	IC2	2.4	2.4.13	2015	China	Asia	8	22	KL7(Good)	OCL1(Very high)	1	1	1	0	1	1	1	0	0	0	1
GCF_002277225	2	208	IC2	2.4	2.4.13	2015	China	Asia	8	22	KL28(None)	OCL1(Very high)	1	1	1	0	1	1	1	0	0	0	1
GCF_002277235	2	208	IC2	2.4	2.4.13	2015	China	Asia	8	22	KL2(Good)	OCL1(Very high)	1	1	1	0	1	1	1	0	0	0	1
GCF_002277275	2	208	IC2	2.4	2.4.13	2015	China	Asia	8	22	KL28(Low)	OCL1(Very high)	1	1	1	0	1	1	1	0	0	0	1
GCF_002277285	2	208	IC2	2.4	2.4.13	2015	China	Asia	8	23	KL7(Very high)	OCL1(Very high)	1	1	1	0	1	1	1	0	0	0	1
GCF_002277315	2	208	IC2	2.4	2.4.13	2015	China	Asia	8	22	KL2(Very high)	OCL1(Very high)	1	1	1	0	1	1	1	0	0	0	1
GCF_002277325	2	208	IC2	2.4	2.4.13	2015	China	Asia	8	22	KL2(Very high)	OCL1(Very high)	1	1	1	0	1	1	1	0	0	0	1
GCF_002277355	2	208	IC2	2.4	2.4.13	2015	China	Asia	8	22	KL7(Very high)	OCL1(Very high)	1	1	1	0	1	1	1	0	0	0	1
GCF_002277365	2	208	IC2	2.4	2.4.13	2015	China	Asia	8	21	KL28(Low)	OCL1(Very high)	1	1	1	0	1	1	1	0	0	0	1
GCF_002277385	2	208	IC2	2.4	2.4.13	2015	China	Asia	8	22	KL28(None)	OCL1(Very high)	1	1	1	0	1	1	1	0	0	0	1
GCF_002277405	2	208	IC2	2.4	2.4.13	2015	China	Asia	8	21	KL28(None)	OCL1(Very high)	1	1	1	0	1	1	1	0	0	0	1
GCF_002277435	2	208	IC2	2.4	2.4.13	2015	China	Asia	8	21	KL28(None)	OCL1(Very high)	1	1	1	0	1	1	1	0	0	0	1
GCF_002277445	2	208	IC2	2.4	2.4.13	2015	China	Asia	8	22	KL28(None)	OCL1(Very high)	1	1	1	0	1	1	1	0	0	0	1
GCF_002277485	2	208	IC2	2.4	2.4.13	2015	China	Asia	8	22	KL2(Very high)	OCL1(Very high)	1	1	1	0	1	1	1	0	0	0	1
GCF_002277505	2	208	IC2	2.4	2.4.13	2015	China	Asia	8	22	KL7(Good)	OCL1(Very high)	1	1	1	0	1	1	1	0	0	0	1
GCF_002277515	2	208	IC2	2.4	2.4.13	2015	China	Asia	8	22	KL2(Very high)	OCL1(Very high)	1	1	1	0	1	1	1	0	0	0	1
GCF_002277535	2	208	IC2	2.4	2.4.13	2015	China	Asia	6	18	KL2(Very high)	OCL1(Very high)	1	1	1	0	1	1	0	0	0	0	1
GCF_002277585	2	208	IC2	2.4	2.4.13	2015	China	Asia	8	22	KL28(None)	OCL1(Very high)	1	1	1	0	1	1	1	0	0	0	1
GCF_002277605	2	208	IC2	2.4	2.4.13	2015	China	Asia	8	22	KL2(Very high)	OCL1(Very high)	1	1	1	0	1	1	1	0	0	0	1
GCF_002277635	2	208	IC2	2.4	2.4.13	2015	China	Asia	8	22	KL28(Low)	OCL1(Very high)	1	1	1	0	1	1	1	0	0	0	1
GCF_002277655	2	208	IC2	2.4	2.4.13	2015	China	Asia	8	21	KL28(None)	OCL1(Very high)	1	1	1	0	1	1	1	0	0	0	1
GCF_002277675	2	208	IC2	2.4	2.4.13	2015	China	Asia	8	22	KL7(Very high)	OCL1(Very high)	1	1	1	0	1	1	1	0	0	0	1
GCF_002277705	2	208	IC2	2.4	2.4.13	2015	China	Asia	8	22	KL2(Good)	OCL1(Very high)	1	1	1	0	1	1	1	0	0	0	1
GCF_002277715	2	208	IC2	2.4	2.4.13	2015	China	Asia	8	21	KL7(Good)	OCL1(Very high)	1	1	1	0	1	1	1	0	0	0	1
GCF_002288625	New Pasteur ST	231	IC1	1.4	1.4.4	2016	Togo	Africa	9	22	KL17(Good)	OCL1(Very high)	1	1	1	0	0	1	0	1	0	0	1
GCF_002367895	294	New Oxford ST				2016	Luxembourg	Europe	2	5	KL202(Perfect)	OCL4(Very high)	1	0	0	0	0	0	0	0	0	0	0
GCF_002411775	164	1418				2015	Ghana	Africa	6	11	KL47(Good)	OCL5(Very high)	1	1	1	0	0	1	0	0	0	0	0
GCF_002416325	3	106	IC3			2008	Switzerland	Europe	6	15	KL17(Good)	OCL1(Very high)	1	0	1	0	0	1	0	1	0	0	1
GCF_002416345	20	449	IC1	1.4	1.4.2	2006	Switzerland	Europe	6	13	KL1(Good)	OCL1(Perfect)	1	0	1	0	0	1	1	0	0	0	1
GCF_002416365	3	106	IC3			2015	Switzerland	Europe	6	14	KL17(Good)	OCL1(Very high)	1	0	1	0	0	1	0	1	0	0	1
GCF_002416375	20	449	IC1	1.4	1.4.2	2015	Switzerland	Europe	6	13	KL1(Good)	OCL1(Perfect)	1	0	1	0	0	1	1	0	0	0	1
GCF_002416395	2	208	IC2	2.3	2.3.2	2015	Switzerland	Europe	6	17	KL2(Good)	OCL1(Very high)	1	1	1	0	1	1	0	0	0	0	1
GCF_002416425	2	208	IC2	2.3	2.3.2	2015	Switzerland	Europe	6	18	KL2(Good)	OCL1(Very high)	1	1	1	0	1	1	0	0	0	0	1
GCF_002416435	2	208	IC2	2.3	2.3.2	2010	Switzerland	Europe	6	18	KL2(Good)	OCL1(Very high)	1	1	1	0	1	1	0	0	0	0	1
GCF_002416475	20	449	IC1	1.4	1.4.2	2015	Switzerland	Europe	6	13	KL1(Good)	OCL1(Perfect)	1	0	1	0	0	1	1	0	0	0	1
GCF_002504145	138	1469				2010	China	Asia	3	5	KL139(Very high)	OCL6(Very high)	1	1	0	0	0	0	0	0	0	0	0
GCF_002573725	923	1422				2013	Poland	Europe	2	4	KL152(Good)	OCL1(Very high)	0	0	1	0	0	0	0	0	0	0	0
GCF_002573735	927	1433				2014	Poland	Europe	2	6	KL201(Perfect)	OCL4(Very high)	1	0	0	0	0	0	0	0	0	0	0
GCF_002573795	23	761	IC8			2015	Germany	Europe	4	6	KL62(Good)	OCL2(Good)	1	0	1	0	0	0	0	0	0	0	1
GCF_002573805	25	229	IC7			2015	Germany	Europe	4	6	KL14(Good)	OCL6(Very high)	1	0	1	0	0	0	0	0	0	0	1
GCF_002573815	821	2146				2015	Germany	Europe	3	5	KL177(Very high)	OCL1(Very high)	1	0	1	0	0	0	0	0	0	0	0
GCF_002573825	240	1453				2016	Germany	Europe	3	6	KL16(Good)	OCL2(Very high)	1	0	1	0	0	0	0	0	0	0	0
GCF_002573875	1179	New Oxford ST				2016	Poland	Europe	3	6	KL218(Perfect)	OCL1(Very high)	1	0	1	0	0	0	0	0	0	0	0
GCF_002573895	690	1454				2013	Poland	Europe	3	5	KL41(Low)	OCL1(Very high)	1	0	1	0	0	0	0	0	0	0	0
GCF_002573905	938	1447				2016	Germany	Europe	3	5	KL121(Good)	OCL1(Very high)	1	0	1	0	0	0	0	0	0	0	0
GCF_002573915	138	819				2016	Germany	Europe	3	5	KL95(Good)	OCL7(Very high)	1	0	1	0	0	0	0	0	0	0	0
GCF_002634325	2	556	IC2	2.2	2.2.6	2014	Cote d'Ivoire	Africa	8	25	KL42(Good)	OCL1(Good)	1	1	1	0	1	1	1	0	0	0	1
GCF_002634345	New Pasteur ST	New Oxford ST	IC2	2.2	2.2.6	2014	Cote d'Ivoire	Africa	8	24	KL42(Good)	OCL1(Good)	1	1	1	0	1	1	1	0	0	0	1
GCF_002724085	New Pasteur ST	New Oxford ST	IC1	1.4	1.4.4	2016	Togo	Africa	9	21	KL17(Good)	OCL1(Very high)	1	1	1	0	0	1	0	1	0	0	1
GCF_002727055	New Pasteur ST	2405				2014	Brazil	South America	5	10	KL81(Good)	OCL6(Very high)	1	1	1	0	0	1	0	0	0	0	0
GCF_002741415	1	439	IC1	1.4	1.4.3	2002	Greece	Europe	6	18	KL20(Perfect)	OCL4(Perfect)	1	1	1	0	1	1	0	0	0	0	0
GCF_002753915	2	452	IC2	2.2	2.2.6	2012	Pakistan	Asia	5	19	KL3(High)	OCL1(Very high)	1	0	1	0	1	1	0	0	0	0	1
GCF_002760695	85	1089	IC9			2013	Tunisia	Africa	7	13	KL152(Good)	OCL6(Very high)	1	1	1	0	0	1	1	0	0	0	1
GCF_002760705	New Pasteur ST	New Oxford ST	IC9			2014	Tunisia	Africa	8	15	KL152(None)	OCL6(Good)	1	1	1	0	0	1	1	0	0	0	1
GCF_002760715	85	1089	IC9			2015	Tunisia	Africa	8	16	KL152(None)	OCL6(Very high)	1	1	1	0	0	1	1	0	0	0	1
GCF_002760725	New Pasteur ST	New Oxford ST	IC9			2014	Tunisia	Africa	7	13	KL152(None)	OCL6(Good)	1	0	1	0	0	1	1	0	0	0	1
GCF_002760765	New Pasteur ST	New Oxford ST	IC9			2015	Tunisia	Africa	7	14	KL152(Good)	OCL6(Good)	1	1	1	0	0	1	1	0	0	0	1
GCF_002760785	85	New Oxford ST	IC9			2015	Tunisia	Africa	7	13	KL152(None)	OCL6(Very high)	1	0	1	0	0	1	1	0	0	0	1
GCF_002760795	New Pasteur ST	New Oxford ST	IC9			2015	Tunisia	Africa	8	18	KL152(None)	OCL6(Good)	1	1	1	0	0	1	1	0	0	0	1
GCF_002760825	New Pasteur ST	New Oxford ST	IC9			2015	Tunisia	Africa	8	18	KL152(None)	OCL6(Good)	1	1	1	0	0	1	1	0	0	0	1
GCF_002760835	85	1089	IC9			2015	Tunisia	Africa	7	13	KL152(Good)	OCL6(Very high)	1	1	1	0	0	1	1	0	0	0	1
GCF_002760845	New Pasteur ST	1089	IC9			2015	Tunisia	Africa	8	14	KL152(Good)	OCL6(Very high)	1	1	1	0	0	1	1	0	0	0	1
GCF_002760895	New Pasteur ST	New Oxford ST	IC9			2015	Tunisia	Africa	6	12	KL152(None)	OCL6(Very high)	1	0	1	0	0	1	1	0	0	0	1
GCF_002761575	2	208	IC2	2.3	2.3.2	2013	Australia	Oceania	6	19	KL2(Very high)	OCL1(Very high)	1	1	1	0	1	1	0	0	0	0	1
GCF_002762095	2	191	IC2	2.4	2.4.10	2011	China	Asia	5	12	KL72(Very high)	OCL1(Very high)	1	0	1	0	1	1	0	0	0	0	1
GCF_002762115	2	191	IC2	2.4	2.4.10	2011	China	Asia	5	12	KL72(Very high)	OCL1(Very high)	1	0	1	0	1	1	0	0	0	0	1
GCF_002762155	2	1962	IC2	2.3	2.3.3	2011	China	Asia	7	21	KL34(Very high)	OCL1(High)	1	1	1	0	1	1	1	0	0	0	1
GCF_002762495	2	848	IC2	2.4	2.4.14	2015	India	Asia	9	24	KL13(High)	OCL1(High)	1	1	1	0	1	1	1	0	0	0	1
GCF_002762505	2	848	IC2	2.4	2.4.14	2016	India	Asia	9	23	KL13(Perfect)	OCL1(Very high)	1	1	1	0	1	1	1	0	0	0	1
GCF_002762535	2	848	IC2	2.4	2.4.14	2015	India	Asia	9	24	KL13(Good)	OCL1(Very high)	1	1	1	0	1	1	1	0	0	0	1
GCF_002762545	2	848	IC2	2.4	2.4.14	2015	India	Asia	9	24	KL13(Perfect)	OCL1(Very high)	1	1	1	0	1	1	1	0	0	0	1
GCF_002183845	2	208	IC2	2.4	2.4.2	2010	United States	North America	5	12	KL2(Very high)	OCL1(Very high)	1	1	1	0	1	0	0	0	0	0	1
GCF_002803655	2	1052	IC2	2.4	2.4.14	2016	Iraq	Asia	8	19	KL234(Good)	OCL1(Very high)	1	1	1	0	1	1	1	0	0	0	1
GCF_002837005	2	457	IC2	2.5	2.5.2	2014	China	Asia	6	18	KL49(Very high)	OCL1(Very high)	1	1	1	0	1	0	1	0	0	0	1
GCF_002837035	2	457	IC2	2.5	2.5.2	2014	China	Asia	6	18	KL49(Very high)	OCL1(Very high)	1	1	1	0	1	0	1	0	0	0	1
GCF_002837885	575	582	IC8			2016	Iraq	Asia	7	18	KL13(Perfect)	OCL2(Good)	1	1	1	0	0	1	1	0	0	0	1
GCF_002837895	513	860				2016	Iraq	Asia	3	10	KL15(Very high)	OCL1(Very high)	1	0	1	0	0	0	0	0	0	0	0
GCF_002837905	575	582	IC8			2016	Iraq	Asia	7	17	KL13(Very high)	OCL2(Good)	1	1	1	0	0	1	1	0	0	0	1
GCF_002837945	203	New Oxford ST				2016	Iraq	Asia	3	5	KL81(Very high)	OCL6(Very high)	1	0	1	0	0	0	0	0	0	0	0
GCF_002837955	1	231	IC1	1.4	1.4.4	2016	Iraq	Asia	11	24	KL17(Very high)	OCL1(Very high)	1	1	1	0	0	1	1	1	0	0	1
GCF_002837985	2	1052	IC2	2.4	2.4.14	2016	Iraq	Asia	8	20	KL234(Good)	OCL1(Very high)	1	1	1	0	1	1	1	0	0	0	1
GCF_002838005	1	231	IC1	1.4	1.4.4	2016	Iraq	Asia	11	25	KL17(Very high)	OCL1(Good)	1	1	1	0	0	1	1	1	0	0	1
GCF_002838015	2	New Oxford ST	IC2	2.3	2.3.2	2016	Iraq	Asia	7	21	KL234(Good)	OCL1(Very high)	1	1	1	0	1	1	1	0	0	0	1
GCF_002838025	717	498	IC1	1.4	1.4.10	2016	Iraq	Asia	5	11	KL12(Very high)	OCL5(Perfect)	1	0	1	0	0	1	0	0	0	0	1
GCF_002843665	2	191	IC2	2.4	2.4.10	2012	South Korea	Asia	7	20	KL72(Very high)	OCL1(Very high)	1	0	1	0	1	1	1	0	0	0	1
GCF_002863545	1553	195	IC2	2.5	2.5.6	2013	India	Asia	7	18	KL3(Very high)	OCL1(Very high)	1	1	1	0	0	1	1	0	0	0	1
GCF_002885855	286	New Oxford ST				2016	Togo	Africa	3	5	KL155(None)	OCL1(Very high)	1	0	1	0	0	0	0	0	0	0	0
GCF_002183855	2	350	IC2	2.2	2.2.5	2010	United States	North America	7	18	KL9(Very high)	OCL1(Good)	1	1	1	0	1	1	1	0	0	0	1
GCF_002922935	107	1552				2008	Brazil	South America	4	8	KL47(Very high)	OCL17(High)	1	0	1	0	0	0	0	0	0	0	0
GCF_002927775	10	447	IC8			2015	Honduras	North America	7	17	KL49(Perfect)	OCL2(Very high)	1	1	1	0	1	1	0	0	0	0	1
GCF_002927805	10	447	IC8			2015	Honduras	North America	5	10	KL49(Perfect)	OCL2(Very high)	1	0	1	0	0	0	0	0	0	0	1
GCF_002927855	25	1588	IC7			2016	Honduras	North America	4	8	KL134(Perfect)	OCL6(Good)	1	0	1	0	0	0	0	0	0	0	1
GCF_002927895	1	1590	IC1	1.4	1.4.3	2016	Honduras	North America	6	16	KL146(Perfect)	OCL1(Perfect)	1	1	0	0	0	1	0	0	0	0	1
GCF_002927915	156	758	IC5			2016	Honduras	North America	5	15	KL9(Very high)	OCL10(Good)	1	0	1	0	0	1	0	0	0	0	1
GCF_002927965	25	229	IC7			2015	Honduras	North America	5	9	KL132(Perfect)	OCL10(Very high)	1	1	1	0	0	0	0	0	0	0	1
GCF_002927995	10	447	IC8			2015	Honduras	North America	5	10	KL49(Perfect)	OCL2(Good)	1	0	1	0	0	0	1	0	0	0	1
GCF_002928015	106	1587				2015	Honduras	North America	3	5	KL48(Very high)	OCL6(Very high)	1	0	1	0	0	0	0	0	0	0	0
GCF_002928035	New Pasteur ST	New Oxford ST	IC5			2015	Honduras	North America	5	13	KL65(None)	OCL1(None)	1	0	1	0	1	1	0	0	0	0	1
GCF_002928045	New Pasteur ST	New Oxford ST				2015	Honduras	North America	7	15	KL186(Good)	OCL1(Good)	1	0	1	0	0	1	1	1	0	0	0
GCF_002928075	108	1586				2015	Honduras	North America	7	19	KL186(Perfect)	OCL1(Very high)	1	0	1	0	0	1	1	1	0	0	0
GCF_002928095	156	758	IC5			2016	Honduras	North America	5	15	KL9(Very high)	OCL10(Good)	1	0	1	0	0	1	0	0	0	0	1
GCF_002928135	156	758	IC5			2015	Honduras	North America	5	15	KL9(Very high)	OCL10(Good)	1	0	1	0	0	1	0	0	0	0	1
GCF_002928145	77	1325				2015	Honduras	North America	3	5	KL23(Very high)	OCL2(Very high)	1	0	1	0	0	0	0	0	0	0	0
GCF_002928155	267	1589				2015	Honduras	North America	8	13	KL166(Perfect)	OCL2(Good)	1	1	1	0	0	1	0	1	0	0	0
GCF_002928195	106	1587				2015	Honduras	North America	3	5	KL48(Very high)	OCL6(Very high)	1	0	1	0	0	0	0	0	0	0	0
GCF_002947415	2	350	IC2	2.2	2.2.5	Unknown	United States	North America	7	18	KL9(Very high)	OCL1(High)	1	1	1	0	1	1	1	0	0	0	1
GCF_002947845	79	205	IC5			Unknown	United States	North America	5	11	KL159(High)	OCL10(High)	1	0	1	0	0	1	0	0	0	0	1
GCF_002183875	2	208	IC2	2.4	2.4.2	2009	United States	North America	8	21	KL2(Very high)	OCL1(Very high)	1	1	1	0	1	1	1	0	0	0	1
GCF_002948925	229	203	IC3			Unknown	United States	North America	7	18	KL17(Very high)	OCL1(Very high)	1	0	1	0	1	1	1	1	0	0	1
GCF_002183905	2	208	IC2	2.4	2.4.2	2009	United States	North America	8	22	KL2(Very high)	OCL1(Very high)	1	1	1	0	1	1	1	0	0	0	1
GCF_002183925	10	447	IC8			2009	United States	North America	4	8	KL49(Very high)	OCL2(Very high)	1	0	1	0	0	0	0	0	0	0	1
GCF_002183945	2	208	IC2	2.4	2.4.2	2009	United States	North America	8	22	KL2(Very high)	OCL1(Very high)	1	1	1	0	1	1	1	0	0	0	1
GCF_002183955	2	281	IC2	2.2	2.2.4	2013	United States	North America	5	15	KL22(Very high)	OCL3(Good)	1	0	1	0	1	1	0	0	0	0	1
GCF_002950495	2	368	IC2	2.3	2.3.3	2015	China	Asia	8	25	KL34(Perfect)	OCL1(Very high)	1	1	1	0	1	1	1	0	0	0	1
GCF_002183975	2	208	IC2	2.4	2.4.12	2013	United States	North America	8	19	KL152(Very high)	OCL1(Very high)	1	1	1	0	0	1	1	0	0	0	1
GCF_002184005	2	350	IC2	2.2	2.2.5	2013	United States	North America	7	18	KL9(Very high)	OCL1(Good)	1	1	1	0	1	1	1	0	0	0	1
GCF_002184025	2	350	IC2	2.2	2.2.5	2013	United States	North America	7	18	KL9(Very high)	OCL1(Good)	1	1	1	0	1	1	1	0	0	0	1
GCF_002184035	2	281	IC2	2.2	2.2.4	2013	United States	North America	5	13	KL22(Very high)	OCL3(Good)	1	0	1	0	1	1	0	0	0	0	1
GCF_002184055	2	208	IC2	2.4	2.4.2	2012	United States	North America	8	22	KL2(Very high)	OCL1(Very high)	1	1	1	0	1	1	1	0	0	0	1
GCF_002184085	2	208	IC2	2.4	2.4.2	2012	United States	North America	8	22	KL2(Very high)	OCL1(Very high)	1	1	1	0	1	1	1	0	0	0	1
GCF_002184105	2	208	IC2	2.4	2.4.2	2012	United States	North America	8	22	KL2(Good)	OCL1(Very high)	1	1	1	0	1	1	1	0	0	0	1
GCF_002184265	2	208	IC2	2.4	2.4.2	2009	United States	North America	8	21	KL2(Very high)	OCL1(Very high)	1	1	1	0	1	1	1	0	0	0	1
GCF_002184275	79	New Oxford ST	IC5			2007	United States	North America	6	19	KL151(Good)	OCL10(Very high)	1	0	1	0	1	1	1	0	0	0	1
GCF_002184285	2	473	IC2	2.4	2.4.2	Unknown	United States	North America	6	15	KL3(Very high)	OCL1(Very high)	1	1	1	0	1	1	0	0	0	0	1
GCF_002184325	406	310				2008	United States	North America	5	12	KL1(Very high)	OCL1(Very high)	1	0	1	0	1	1	0	0	0	0	0
GCF_002184335	406	310				2007	United States	North America	5	13	KL1(Very high)	OCL1(Very high)	1	0	1	0	1	1	0	0	0	0	0
GCF_002184365	79	124	IC5			Unknown	United States	North America	7	20	KL151(Good)	OCL10(Good)	1	0	1	0	1	1	1	0	0	0	1
GCF_002184385	2	350	IC2	2.2	2.2.5	Unknown	United States	North America	7	17	KL9(Very high)	OCL1(Good)	1	1	1	0	1	1	1	0	0	0	1
GCF_002184565	2	350	IC2	2.2	2.2.5	Unknown	United States	North America	7	18	KL9(Very high)	OCL1(Good)	1	1	1	0	1	1	1	0	0	0	1
GCF_002184605	2	417	IC2	2.3	2.3.2	Unknown	United States	North America	7	19	KL23(Very high)	OCL1(High)	1	1	1	0	1	1	1	0	0	0	1
GCF_002803025	1	231	IC1	1.4	1.4.0	1994	United States	North America	4	7	KL1(Perfect)	OCL1(Perfect)	1	0	1	0	0	0	0	0	0	0	1
GCF_002902885	1543	2201				2016	United States	North America	3	7	KL142(Very high)	OCL6(Very high)	1	0	0	0	0	0	0	0	0	0	0
GCF_002948475	2	208	IC2	2.4	2.4.2	2007	United States	North America	7	18	KL2(Very high)	OCL1(Very high)	1	1	1	0	1	1	1	0	0	0	1
GCF_002950415	2	348	IC2	2.3	2.3.2	2010	United States	North America	6	16	KL9(Good)	OCL1(Very high)	1	1	1	0	1	0	1	0	0	0	1
GCF_002950425	2	451	IC2	2.4	2.4.14	2011	United States	North America	9	21	KL125(Good)	OCL1(Very high)	1	1	1	0	1	1	1	0	0	0	1
GCF_002950435	46	1557				2016	United States	North America	4	7	KL120(Good)	OCL1(Very high)	1	0	1	0	0	0	0	0	0	0	0
GCF_002950455	2	281	IC2	2.2	2.2.4	2011	United States	North America	5	12	KL22(Good)	OCL3(Good)	1	0	1	0	1	1	0	0	0	0	1
GCF_002950515	2	451	IC2	2.4	2.4.14	2011	United States	North America	9	26	KL125(None)	OCL1(Very high)	1	1	1	0	1	1	1	0	0	0	1
GCF_002950525	2	451	IC2	2.4	2.4.14	2011	United States	North America	9	26	KL125(None)	OCL1(Very high)	1	1	1	0	1	1	1	0	0	0	1
GCF_002950545	2	208	IC2	2.4	2.4.12	2010	United States	North America	8	21	KL2(Good)	OCL1(Very high)	1	1	1	0	1	1	1	0	0	0	1
GCF_002950595	2	208	IC2	2.4	2.4.12	2009	United States	North America	8	21	KL2(Good)	OCL1(Very high)	1	1	1	0	1	1	1	0	0	0	1
GCF_002950615	2	208	IC2	2.4	2.4.12	2015	United States	North America	8	22	KL2(Good)	OCL1(Very high)	1	1	1	0	1	1	1	0	0	0	1
GCF_002950625	2	208	IC2	2.4	2.4.12	2009	United States	North America	8	21	KL2(Very high)	OCL1(Very high)	1	1	1	0	1	1	1	0	0	0	1
GCF_002950655	2	208	IC2	2.4	2.4.2	2015	United States	North America	8	23	KL2(Good)	OCL1(Very high)	1	1	1	0	1	1	1	0	0	0	1
GCF_002950675	2	208	IC2	2.4	2.4.2	2015	United States	North America	8	23	KL2(Good)	OCL1(Good)	1	1	1	0	1	1	1	0	0	0	1
GCF_002950715	2	208	IC2	2.4	2.4.12	2007	United States	North America	8	21	KL213(None)	OCL1(Very high)	1	1	1	0	1	1	1	0	0	0	1
GCF_002950725	2	208	IC2	2.4	2.4.12	2007	United States	North America	8	20	KL2(Very high)	OCL1(Very high)	1	1	1	0	1	1	1	0	0	0	1
GCF_002950755	2	208	IC2	2.4	2.4.2	2015	United States	North America	8	22	KL2(Very high)	OCL1(Very high)	1	1	1	0	1	1	1	0	0	0	1
GCF_002950795	2	208	IC2	2.4	2.4.2	2015	United States	North America	8	22	KL2(Good)	OCL1(Very high)	1	1	1	0	1	1	1	0	0	0	1
GCF_002950815	2	208	IC2	2.4	2.4.12	2014	United States	North America	8	21	KL2(Good)	OCL1(Very high)	1	1	1	0	1	1	1	0	0	0	1
GCF_002950825	2	208	IC2	2.4	2.4.12	2014	United States	North America	8	21	KL2(Good)	OCL1(Very high)	1	1	1	0	1	1	1	0	0	0	1
GCF_002992205	2	195	IC2	2.5	2.5.6	2015	Kuwait	Asia	6	18	KL3(High)	OCL1(Very high)	1	1	1	0	1	0	1	0	0	0	1
GCF_002992225	2	195	IC2	2.5	2.5.6	2015	Kuwait	Asia	6	18	KL3(High)	OCL1(Very high)	1	1	1	0	1	0	1	0	0	0	1
GCF_002992235	2	195	IC2	2.5	2.5.6	2015	Kuwait	Asia	7	19	KL3(Very high)	OCL1(Very high)	1	1	1	0	1	1	1	0	0	0	1
GCF_002992255	2	195	IC2	2.5	2.5.6	2015	Kuwait	Asia	6	17	KL3(High)	OCL1(Very high)	1	1	1	0	0	0	1	0	0	0	1
GCF_002992285	2	New Oxford ST	IC2	2.5	2.5.6	2016	Kuwait	Asia	7	19	KL3(Very high)	OCL1(Very high)	1	1	1	0	1	1	1	0	0	0	1
GCF_002992305	2	195	IC2	2.5	2.5.6	2015	Kuwait	Asia	6	17	KL3(Good)	OCL1(Very high)	1	1	1	0	0	0	1	0	0	0	1
GCF_002992325	2	195	IC2	2.5	2.5.6	2016	Kuwait	Asia	6	18	KL3(High)	OCL1(Very high)	1	1	1	0	1	0	1	0	0	0	1
GCF_002992345	2	195	IC2	2.5	2.5.6	2016	Kuwait	Asia	7	17	KL3(Very high)	OCL1(Very high)	1	1	1	0	1	1	1	0	0	0	1
GCF_002992365	2	195	IC2	2.5	2.5.6	2016	Kuwait	Asia	7	19	KL3(High)	OCL1(Very high)	1	1	1	0	1	1	1	0	0	0	1
GCF_002992385	2	195	IC2	2.5	2.5.6	2015	Kuwait	Asia	7	17	KL3(Very high)	OCL1(Very high)	1	1	1	0	1	1	1	0	0	0	1
GCF_002992405	2	195	IC2	2.5	2.5.6	2015	Kuwait	Asia	6	18	KL3(Good)	OCL1(Very high)	1	1	1	0	1	0	1	0	0	0	1
GCF_002992425	2	195	IC2	2.5	2.5.6	2015	Kuwait	Asia	7	19	KL3(High)	OCL1(Very high)	1	1	1	0	1	1	1	0	0	0	1
GCF_002992445	2	195	IC2	2.5	2.5.6	2015	Kuwait	Asia	7	19	KL3(Good)	OCL1(Very high)	1	1	1	0	1	1	1	0	0	0	1
GCF_002992465	2	195	IC2	2.5	2.5.6	2015	Kuwait	Asia	7	17	KL3(Good)	OCL1(Very high)	1	1	1	0	1	1	1	0	0	0	1
GCF_002992485	2	195	IC2	2.5	2.5.6	2015	Kuwait	Asia	7	19	KL3(Very high)	OCL1(Very high)	1	1	1	0	1	1	1	0	0	0	1
GCF_002992505	2	195	IC2	2.5	2.5.6	2014	Kuwait	Asia	6	18	KL3(Very high)	OCL1(Very high)	1	1	1	0	1	0	1	0	0	0	1
GCF_002992525	2	195	IC2	2.5	2.5.6	2014	Kuwait	Asia	6	18	KL3(Very high)	OCL1(Very high)	1	1	1	0	1	0	1	0	0	0	1
GCF_002992545	2	195	IC2	2.5	2.5.6	2014	Kuwait	Asia	7	19	KL3(Very high)	OCL1(Very high)	1	1	1	0	1	1	1	0	0	0	1
GCF_002992565	113	884				2014	Kuwait	Asia	9	22	KL10(Very high)	OCL13(Good)	1	1	1	0	0	1	1	0	0	0	0
GCF_002992585	2	195	IC2	2.5	2.5.6	2014	Kuwait	Asia	7	19	KL3(Very high)	OCL1(Very high)	1	1	1	0	1	1	1	0	0	0	1
GCF_002992605	2	452	IC2	2.2	2.2.6	2014	Kuwait	Asia	5	15	KL2(Very high)	OCL1(Very high)	1	0	1	0	1	1	0	0	0	0	1
GCF_002992625	2	New Oxford ST				2015	Kuwait	Asia	8	22	KL22(Good)	OCL1(Very high)	1	1	1	0	1	1	1	0	0	0	0
GCF_002992645	113	884				2015	Kuwait	Asia	9	22	KL10(Very high)	OCL13(Good)	1	1	1	0	0	1	1	0	0	0	0
GCF_002992665	2	195	IC2	2.5	2.5.6	2014	Kuwait	Asia	6	18	KL3(Very high)	OCL1(Very high)	1	1	1	0	1	0	1	0	0	0	1
GCF_002992685	2	452	IC2	2.2	2.2.6	2014	Kuwait	Asia	5	14	KL2(Very high)	OCL1(Very high)	1	0	1	0	1	1	0	0	0	0	1
GCF_002992705	2	195	IC2	2.5	2.5.6	2015	Kuwait	Asia	7	19	KL3(Very high)	OCL1(Very high)	1	1	1	0	1	1	1	0	0	0	1
GCF_002992715	2	195	IC2	2.5	2.5.6	2015	Kuwait	Asia	6	18	KL3(Good)	OCL1(Very high)	1	1	1	0	1	0	1	0	0	0	1
GCF_002992745	2	195	IC2	2.5	2.5.6	2015	Kuwait	Asia	6	17	KL3(High)	OCL1(Very high)	1	1	1	0	0	0	1	0	0	0	1
GCF_002992765	2	195	IC2	2.5	2.5.6	2015	Kuwait	Asia	7	19	KL3(Very high)	OCL1(Very high)	1	1	1	0	1	1	1	0	0	0	1
GCF_002992775	2	195	IC2	2.5	2.5.6	2016	Kuwait	Asia	6	18	KL3(Very high)	OCL1(Very high)	1	1	1	0	1	0	1	0	0	0	1
GCF_002992805	2	195	IC2	2.5	2.5.6	2015	Kuwait	Asia	7	19	KL3(Very high)	OCL1(Very high)	1	1	1	0	1	1	1	0	0	0	1
GCF_002992825	2	195	IC2	2.5	2.5.6	2015	Kuwait	Asia	7	19	KL3(Very high)	OCL1(Very high)	1	1	1	0	1	1	1	0	0	0	1
GCF_002992845	2	195	IC2	2.5	2.5.6	2015	Kuwait	Asia	7	19	KL3(Very high)	OCL1(Very high)	1	1	1	0	1	1	1	0	0	0	1
GCF_002992865	2	195	IC2	2.5	2.5.6	2015	Kuwait	Asia	7	17	KL3(Very high)	OCL1(Very high)	1	1	1	0	1	1	1	0	0	0	1
GCF_002992875	2	195	IC2	2.5	2.5.6	2015	Kuwait	Asia	6	18	KL3(Very high)	OCL1(Very high)	1	1	1	0	1	0	1	0	0	0	1
GCF_002992905	2	452	IC2	2.2	2.2.6	2014	Kuwait	Asia	5	15	KL2(Very high)	OCL1(Very high)	1	0	1	0	1	1	0	0	0	0	1
GCF_002996805	1	231	IC1	1.4	1.4.4	Unknown	United States	North America	12	37	KL17(Very high)	OCL1(Very high)	1	1	1	0	0	1	1	1	0	0	1
GCF_002999195	20	449	IC1	1.4	1.4.0	2015	China	Asia	9	22	KL1(Very high)	OCL1(Perfect)	1	1	1	0	0	1	1	1	0	0	1
GCF_003006035	25	229	IC7			Unknown	United States	North America	7	17	KL14(Perfect)	OCL6(Very high)	1	1	1	0	0	1	0	0	0	0	1
GCF_003006835	2	457	IC2	2.5	2.5.2	2013	China	Asia	6	17	KL49(Very high)	OCL1(Very high)	1	1	1	0	1	0	1	0	0	0	1
GCF_003006845	2	457	IC2	2.5	2.5.2	2015	China	Asia	7	19	KL49(Very high)	OCL1(Very high)	1	1	1	0	1	1	1	0	0	0	1
GCF_003006875	2	457	IC2	2.5	2.5.2	2015	China	Asia	7	19	KL49(Very high)	OCL1(Very high)	1	1	1	0	1	1	1	0	0	0	1
GCF_003006885	2	457	IC2	2.5	2.5.2	2014	China	Asia	7	19	KL49(Very high)	OCL1(Very high)	1	1	1	0	1	1	1	0	0	0	1
GCF_003006945	52	1464				2014	China	Asia	4	7	KL30(Very high)	OCL1(Very high)	1	0	1	0	0	0	0	0	0	0	0
GCF_003006975	2	457	IC2	2.5	2.5.2	2015	China	Asia	6	17	KL49(Very high)	OCL1(Very high)	1	1	1	0	1	0	1	0	0	0	1
GCF_003006995	2	457	IC2	2.5	2.5.2	2013	China	Asia	7	19	KL49(Very high)	OCL1(Very high)	1	1	1	0	1	1	1	0	0	0	1
GCF_003007015	2	457	IC2	2.5	2.5.2	2015	China	Asia	7	19	KL49(Very high)	OCL1(Very high)	1	1	1	0	1	1	1	0	0	0	1
GCF_003007025	2	457	IC2	2.5	2.5.2	2012	China	Asia	5	15	KL49(Very high)	OCL1(Very high)	1	1	1	0	1	0	0	0	0	0	1
GCF_003007055	2	457	IC2	2.5	2.5.2	2014	China	Asia	6	18	KL49(Very high)	OCL1(Very high)	1	1	1	0	1	0	1	0	0	0	1
GCF_003007065	2	457	IC2	2.5	2.5.2	2012	China	Asia	6	18	KL49(Very high)	OCL1(Very high)	1	1	1	0	1	0	1	0	0	0	1
GCF_003007095	2	457	IC2	2.5	2.5.2	2015	China	Asia	7	19	KL49(Very high)	OCL1(Very high)	1	1	1	0	1	1	1	0	0	0	1
GCF_003007115	2	457	IC2	2.5	2.5.2	2014	China	Asia	7	19	KL49(High)	OCL1(Very high)	1	1	1	0	1	1	1	0	0	0	1
GCF_003007135	2	457	IC2	2.5	2.5.2	2013	China	Asia	7	19	KL49(Very high)	OCL1(Very high)	1	1	1	0	1	1	1	0	0	0	1
GCF_003007145	2	136	IC2	2.5	2.5.6	2012	China	Asia	6	17	KL77(Perfect)	OCL1(Very high)	1	1	1	0	1	0	1	0	0	0	1
GCF_003007215	2	540	IC2	2.4	2.4.6	2013	China	Asia	8	22	KL160(Perfect)	OCL1(Very high)	1	1	1	0	1	1	1	0	0	0	1
GCF_003007245	626	New Oxford ST				2012	China	Asia	3	6	KL7(Very high)	OCL3(Very high)	1	0	1	0	0	0	0	0	0	0	0
GCF_003007275	2	548	IC2	2.4	2.4.13	2015	China	Asia	8	21	KL52(Very high)	OCL1(Very high)	1	1	1	0	1	1	1	0	0	0	1
GCF_003007335	2	457	IC2	2.5	2.5.2	2014	China	Asia	6	17	KL49(High)	OCL1(Very high)	1	1	1	0	1	0	1	0	0	0	1
GCF_003007355	2	457	IC2	2.5	2.5.2	2012	China	Asia	7	19	KL49(Very high)	OCL1(Very high)	1	1	1	0	1	1	1	0	0	0	1
GCF_003007375	2	195	IC2	2.5	2.5.6	2013	China	Asia	7	19	KL3(Very high)	OCL1(Very high)	1	1	1	0	1	1	1	0	0	0	1
GCF_003007395	2	381	IC2	2.4	2.4.7	2013	China	Asia	7	18	KL77(Perfect)	OCL1(Very high)	1	0	1	0	1	1	1	0	0	0	1
GCF_003007405	2	457	IC2	2.5	2.5.2	2012	China	Asia	7	19	KL49(Very high)	OCL1(Very high)	1	1	1	0	1	1	1	0	0	0	1
GCF_003007435	2	457	IC2	2.5	2.5.2	2013	China	Asia	6	18	KL49(Very high)	OCL1(Very high)	1	1	1	0	1	0	1	0	0	0	1
GCF_003007455	2	1633	IC2	2.5	2.5.6	2014	China	Asia	7	18	KL3(Very high)	OCL1(Very high)	1	1	1	0	1	1	1	0	0	0	1
GCF_003007475	2	457	IC2	2.5	2.5.2	2012	China	Asia	7	19	KL49(Very high)	OCL1(Very high)	1	1	1	0	1	1	1	0	0	0	1
GCF_003007485	2	457	IC2	2.5	2.5.2	2014	China	Asia	7	19	KL49(Very high)	OCL1(Very high)	1	1	1	0	1	1	1	0	0	0	1
GCF_003007515	2	457	IC2	2.5	2.5.2	2015	China	Asia	7	19	KL49(Very high)	OCL1(Very high)	1	1	1	0	1	1	1	0	0	0	1
GCF_003007535	2	195	IC2	2.5	2.5.6	2015	China	Asia	6	18	KL3(High)	OCL1(Very high)	1	1	1	0	1	0	1	0	0	0	1
GCF_003007585	2	195	IC2	2.5	2.5.6	2012	China	Asia	7	19	KL3(Very high)	OCL1(Very high)	1	1	1	0	1	1	1	0	0	0	1
GCF_003007615	2	195	IC2	2.5	2.5.6	2014	China	Asia	7	18	KL3(Very high)	OCL1(Very high)	1	1	1	0	1	1	1	0	0	0	1
GCF_003007635	2	195	IC2	2.5	2.5.6	2013	China	Asia	6	17	KL3(Very high)	OCL1(Very high)	1	1	1	0	1	0	1	0	0	0	1
GCF_003007655	2	136	IC2	2.5	2.5.6	2012	China	Asia	6	16	KL77(Very high)	OCL1(Good)	1	1	1	0	1	1	0	0	0	0	1
GCF_003010655	2	208	IC2	2.4	2.4.2	Unknown	United States	North America	8	18	KL2(Very high)	OCL1(Very high)	1	1	1	0	1	1	1	0	0	0	1
GCF_003010675	79	New Oxford ST	IC5			Unknown	United States	North America	5	15	KL151(Very high)	OCL10(High)	1	0	1	0	0	1	0	0	0	0	1
GCF_003012695	636	502	IC2	2.1	2.1.1	2016	Lebanon	Asia	5	13	KL40(Very high)	OCL2(Very high)	1	0	1	0	0	1	0	0	0	0	1
GCF_003020205	1	491	IC1	1.4	1.4.9	2009	Singapore	Asia	5	11	KL17(Very high)	OCL3(Perfect)	1	0	1	0	0	1	0	0	0	0	1
GCF_003020215	1	491	IC1	1.4	1.4.9	2006	Singapore	Asia	5	14	KL107(Perfect)	OCL3(Perfect)	1	0	1	0	0	1	0	0	0	0	1
GCF_003020225	1	2199	IC1	1.4	1.4.9	2011	Singapore	Asia	5	15	KL4(Perfect)	OCL5(Very high)	1	0	1	0	0	1	0	0	0	0	1
GCF_003020265	2	218	IC2	2.4	2.4.16	2004	Singapore	Asia	8	23	KL7(Perfect)	OCL1(Very high)	1	1	1	0	1	1	1	0	0	0	1
GCF_003020275	2	195	IC2	2.5	2.5.6	2010	Singapore	Asia	7	17	KL3(Very high)	OCL1(Very high)	1	1	1	0	1	1	1	0	0	0	1
GCF_003020285	2	195	IC2	2.5	2.5.6	2010	Singapore	Asia	7	17	KL3(Very high)	OCL1(Very high)	1	1	1	0	1	1	1	0	0	0	1
GCF_003020325	2	208	IC2	2.4	2.4.16	2008	Singapore	Asia	8	21	KL2(Very high)	OCL1(Very high)	1	1	1	0	1	1	1	0	0	0	1
GCF_003020345	New Pasteur ST	207	IC1	1.4	1.4.9	2008	Singapore	Asia	6	15	KL4(Perfect)	OCL3(Perfect)	1	0	1	0	0	1	1	0	0	0	1
GCF_003020365	1	2199	IC1	1.4	1.4.9	2004	Singapore	Asia	7	17	KL4(Very high)	OCL3(High)	1	1	1	0	1	1	0	0	0	0	1
GCF_003020385	2	195	IC2	2.5	2.5.6	2011	Singapore	Asia	7	19	KL3(Very high)	OCL1(Very high)	1	1	1	0	1	1	1	0	0	0	1
GCF_003020405	1	New Oxford ST	IC1	1.4	1.4.9	2008	Singapore	Asia	6	16	KL70(Perfect)	OCL3(Perfect)	1	1	0	0	1	1	0	0	0	0	1
GCF_003020415	1	2199	IC1	1.4	1.4.9	2004	Singapore	Asia	5	14	KL4(Perfect)	OCL3(Perfect)	1	0	1	0	0	1	0	0	0	0	1
GCF_003020445	2	369	IC2	2.4	2.4.1	2008	Singapore	Asia	7	21	KL49(Very high)	OCL1(Very high)	1	1	1	0	1	1	1	0	0	0	1
GCF_003020455	2	195	IC2	2.5	2.5.6	2010	Singapore	Asia	7	17	KL3(Very high)	OCL1(Very high)	1	1	1	0	1	1	1	0	0	0	1
GCF_003020485	2	195	IC2	2.5	2.5.6	2009	Singapore	Asia	7	19	KL3(High)	OCL1(Very high)	1	1	1	0	1	1	1	0	0	0	1
GCF_003020505	2	195	IC2	2.5	2.5.6	2009	Singapore	Asia	7	19	KL3(High)	OCL1(Very high)	1	1	1	0	1	1	1	0	0	0	1
GCF_003020525	2	1128	IC2	2.4	2.4.16	2007	Singapore	Asia	8	22	KL32(Very high)	OCL1(Very high)	1	1	1	0	1	1	1	0	0	0	1
GCF_003020545	2	1165	IC2	2.3	2.3.2	2006	Singapore	Asia	6	19	KL73(Perfect)	OCL1(Very high)	1	1	1	0	1	1	0	0	0	0	1
GCF_003020565	2	218	IC2	2.4	2.4.16	2006	Singapore	Asia	8	22	KL7(Perfect)	OCL1(Very high)	1	1	1	0	1	1	1	0	0	0	1
GCF_003020575	2	218	IC2	2.4	2.4.16	2004	Singapore	Asia	8	23	KL7(Perfect)	OCL1(Very high)	1	1	1	0	1	1	1	0	0	0	1
GCF_003038935	636	502	IC2	2.1	2.1.1	2016	Lebanon	Asia	5	13	KL40(Very high)	OCL2(Very high)	1	0	1	0	0	1	0	0	0	0	1
GCF_003038965	636	2059	IC2	2.1	2.1.1	2016	Lebanon	Asia	5	13	KL40(Very high)	OCL2(Very high)	1	0	1	0	0	1	0	0	0	0	1
GCF_003039005	1580	195	IC2	2.5	2.5.6	2016	Lebanon	Asia	7	20	KL3(Very high)	OCL1(Very high)	1	1	1	0	1	1	1	0	0	0	1
GCF_003039035	2	218	IC2	2.5	2.5.6	2016	Lebanon	Asia	6	18	KL9(Very high)	OCL1(Very high)	1	1	1	0	1	0	1	0	0	0	1
GCF_003039055	636	2059	IC2	2.1	2.1.1	2016	Lebanon	Asia	5	13	KL40(Good)	OCL2(Very high)	1	0	1	0	0	1	0	0	0	0	1
GCF_003039075	388	836				2016	Lebanon	Asia	3	5	KL11(Good)	OCL8(Very high)	1	0	1	0	0	0	0	0	0	0	0
GCF_003039115	636	502	IC2	2.1	2.1.1	2016	Lebanon	Asia	5	13	KL40(Very high)	OCL2(Very high)	1	0	1	0	0	1	0	0	0	0	1
GCF_003039135	636	502	IC2	2.1	2.1.1	2016	Lebanon	Asia	5	13	KL40(Very high)	OCL2(Very high)	1	0	1	0	0	1	0	0	0	0	1
GCF_003039155	636	502	IC2	2.1	2.1.1	2016	Lebanon	Asia	5	13	KL40(Good)	OCL2(Very high)	1	0	1	0	0	1	0	0	0	0	1
GCF_003039175	636	502	IC2	2.1	2.1.1	2016	Lebanon	Asia	5	13	KL40(Very high)	OCL2(Very high)	1	0	1	0	0	1	0	0	0	0	1
GCF_003039195	636	502	IC2	2.1	2.1.1	2016	Lebanon	Asia	5	13	KL40(High)	OCL2(Very high)	1	0	1	0	0	1	0	0	0	0	1
GCF_003039215	636	502	IC2	2.1	2.1.1	2016	Lebanon	Asia	5	13	KL40(Good)	OCL2(Very high)	1	0	1	0	0	1	0	0	0	0	1
GCF_003039255	636	502	IC2	2.1	2.1.1	2016	Lebanon	Asia	5	13	KL40(Very high)	OCL2(Very high)	1	0	1	0	0	1	0	0	0	0	1
GCF_003039275	1580	New Oxford ST	IC2	2.5	2.5.6	2016	Lebanon	Asia	7	20	KL9(Good)	OCL1(Very high)	1	1	1	0	1	1	1	0	0	0	1
GCF_003039295	636	502	IC2	2.1	2.1.1	2016	Lebanon	Asia	5	13	KL40(Very high)	OCL2(Very high)	1	0	1	0	0	1	0	0	0	0	1
GCF_003039315	636	502	IC2	2.1	2.1.1	2016	Lebanon	Asia	5	13	KL40(Very high)	OCL2(Very high)	1	0	1	0	0	1	0	0	0	0	1
GCF_003039335	636	502	IC2	2.1	2.1.1	2016	Lebanon	Asia	5	13	KL40(Very high)	OCL2(Very high)	1	0	1	0	0	1	0	0	0	0	1
GCF_003039345	636	502	IC2	2.1	2.1.1	2016	Lebanon	Asia	5	13	KL40(Good)	OCL2(Very high)	1	0	1	0	0	1	0	0	0	0	1
GCF_003039375	2	218	IC2	2.5	2.5.6	2016	Lebanon	Asia	7	18	KL9(Very high)	OCL1(Very high)	1	1	1	0	1	1	1	0	0	0	1
GCF_003039395	636	502	IC2	2.1	2.1.1	2016	Lebanon	Asia	5	13	KL40(Very high)	OCL2(Very high)	1	0	1	0	0	1	0	0	0	0	1
GCF_003039415	636	2054	IC2	2.1	2.1.1	2016	Lebanon	Asia	5	13	KL40(Good)	OCL2(Very high)	1	0	1	0	0	1	0	0	0	0	1
GCF_003039475	2	218	IC2	2.5	2.5.6	2016	Lebanon	Asia	6	18	KL9(Very high)	OCL1(Very high)	1	1	1	0	1	0	1	0	0	0	1
GCF_003052285	2	350	IC2	2.2	2.2.5	2010	Portugal	Europe	5	12	KL9(Very high)	OCL1(Very high)	1	0	1	0	1	0	1	0	0	0	1
GCF_003056465	2	451	IC2	2.5	2.5.6	2015	Italy	Europe	5	16	KL6(Good)	OCL1(Very high)	1	1	1	0	1	0	0	0	0	0	1
GCF_003056475	2	451	IC2	2.5	2.5.6	2015	Italy	Europe	5	16	KL6(Good)	OCL1(Very high)	1	1	1	0	1	0	0	0	0	0	1
GCF_003056505	2	451	IC2	2.5	2.5.6	2015	Italy	Europe	5	16	KL6(Low)	OCL1(Good)	1	1	1	0	1	0	0	0	0	0	1
GCF_003056515	2	451	IC2	2.5	2.5.6	2015	Italy	Europe	5	16	KL6(Good)	OCL1(Very high)	1	1	1	0	1	0	0	0	0	0	1
GCF_003056525	2	451	IC2	2.5	2.5.6	2015	Italy	Europe	5	16	KL6(Good)	OCL1(Very high)	1	1	1	0	1	0	0	0	0	0	1
GCF_003057525	2167	New Oxford ST				2017	Lebanon	Asia	2	4	KL15(Very high)	OCL1(Very high)	0	0	1	0	0	0	0	0	0	0	0
GCF_003070905	490	1562				Unknown	China	Asia	2	4	KL153(None)	OCL6(Very high)	1	0	0	0	0	0	0	0	0	0	0
GCF_003070915	150	744				Unknown	China	Asia	4	6	KL32(Very high)	OCL6(Very high)	1	0	1	0	0	0	0	0	0	0	0
GCF_003070935	575	620	IC8			2010	China	Asia	4	8	KL58(Very high)	OCL2(Very high)	1	0	1	0	0	0	0	0	0	0	1
GCF_003070945	216	1563				Unknown	China	Asia	3	5	KL44(Good)	OCL6(Very high)	1	0	1	0	0	0	0	0	0	0	0
GCF_003072095	2	208	IC2	2.4	2.4.1	Unknown	China	Asia	5	15	KL2(Good)	OCL18(Low)	1	0	1	0	1	1	0	0	0	0	1
GCF_003130565	15	225	IC4			2017	Chile	South America	4	10	KL22(None)	OCL7(Very high)	1	0	1	0	0	0	0	0	0	0	1
GCF_003130905	193	1564				Unknown	China	Asia	2	4	KL83(Very high)	OCL6(Very high)	1	0	0	0	0	0	0	0	0	0	0
GCF_003130915	329	1591				Unknown	China	Asia	3	6	KL9(Very high)	OCL6(Very high)	1	0	1	0	0	0	0	0	0	0	0
GCF_003130925	40	373				2010	China	Asia	4	9	KL47(Very high)	OCL6(Very high)	1	0	0	0	0	1	1	0	0	0	0
GCF_003130945	193	553				2010	China	Asia	2	4	KL48(Very high)	OCL6(Very high)	1	0	0	0	0	0	0	0	0	0	0
GCF_003130985	36	1537				Unknown	China	Asia	3	5	KL187(Perfect)	OCL6(Very high)	1	0	1	0	0	0	0	0	0	0	0
GCF_003131005	106	605				Unknown	China	Asia	3	5	KL111(Perfect)	OCL6(Very high)	1	0	1	0	0	0	0	0	0	0	0
GCF_003131025	10	585	IC8			2010	China	Asia	3	6	KL108(Very high)	OCL2(Very high)	1	0	1	0	0	0	0	0	0	0	0
GCF_003131095	1156	1603				2010	China	Asia	3	7	KL146(Good)	OCL3(Very high)	1	0	1	0	0	0	0	0	0	0	0
GCF_003181015	2	350	IC2	2.2	2.2.5	Unknown	Spain	Europe	6	16	KL9(Very high)	OCL1(Very high)	1	1	1	0	0	1	0	0	0	0	1
GCF_003183965	2	195	IC2	2.5	2.5.6	2017	Turkey	Asia	7	19	KL3(Very high)	OCL1(Very high)	1	1	1	0	1	1	1	0	0	0	1
GCF_003184015	164	1418				2017	Turkey	Asia	5	11	KL47(Very high)	OCL5(Very high)	1	1	1	0	0	0	0	0	0	0	0
GCF_003194535	2	348	IC2	2.3	2.3.2	2012	Sweden	Europe	6	16	KL9(Very high)	OCL1(Very high)	1	1	1	0	1	1	0	0	0	0	1
GCF_003202135	2	208	IC2	2.4	2.4.9	2009	China	Asia	8	27	KL2(Very high)	OCL1(Very high)	1	1	1	0	1	1	1	0	0	0	1
GCF_003231135	1157	1538				2010	China	Asia	2	4	KL104(Good)	OCL7(Good)	1	0	0	0	0	0	0	0	0	0	0
GCF_003231175	52	1539				Unknown	China	Asia	3	5	KL32(Very high)	OCL6(Very high)	1	0	1	0	0	0	0	0	0	0	0
GCF_003231185	341	1540				Unknown	China	Asia	3	8	KL181(Very high)	OCL1(Very high)	1	0	1	0	0	0	0	0	0	0	0
GCF_003240485	85	1089	IC9			2017	France	Europe	8	16	KL152(Good)	OCL6(Very high)	1	0	1	0	0	1	1	0	0	0	1
GCF_003240535	New Pasteur ST	New Oxford ST				2017	France	Europe	4	10	KL52(None)	OCL2(Good)	1	0	1	0	0	0	0	0	0	0	0
GCF_003240555	113	884				2017	France	Europe	5	10	KL10(Good)	OCL13(Good)	1	0	1	0	0	0	1	1	0	0	0
GCF_003264255	2	195	IC2	2.5	2.5.6	2017	China	Asia	6	17	KL3(Very high)	OCL1(Very high)	1	1	1	0	1	0	1	0	0	0	1
GCF_003264275	2	208	IC2	2.4	2.4.2	2017	China	Asia	8	26	KL2(Very high)	OCL1(Very high)	1	1	1	0	1	1	1	0	0	0	1
GCF_003264295	2	195	IC2	2.5	2.5.6	2014	China	Asia	6	16	KL3(Very high)	OCL1(Very high)	1	1	1	0	1	0	1	0	0	0	1
GCF_003288775	2	195	IC2	2.5	2.5.6	2016	China	Asia	6	17	KL3(High)	OCL1(High)	1	1	1	0	1	0	1	0	0	0	1
GCF_003296225	1	New Oxford ST	IC1	1.4	1.4.10	Unknown	Germany	Europe	5	14	KL40(Very high)	OCL2(Very high)	1	0	1	0	0	1	0	0	0	0	1
GCF_003325575	1	231	IC1	1.4	1.4.5	2014	Brazil	South America	6	18	KL1(Perfect)	OCL1(Perfect)	1	0	1	0	0	1	0	0	0	0	1
GCF_003325635	1	231	IC1	1.4	1.4.5	2013	Brazil	South America	5	12	KL1(Perfect)	OCL1(Perfect)	1	0	1	0	0	1	0	0	0	0	1
GCF_003325665	1	231	IC1	1.4	1.4.5	2010	Brazil	South America	5	13	KL1(Perfect)	OCL1(Perfect)	1	0	1	0	0	1	0	0	0	0	1
GCF_003332235	2	195	IC2	2.5	2.5.6	2012	China	Asia	6	18	KL3(Very high)	OCL1(Very high)	1	1	1	0	1	0	1	0	0	0	1
GCF_003335945	2	369	IC2	2.4	2.4.0	2013	China	Asia	8	22	KL9(Very high)	OCL1(Very high)	1	1	1	0	1	1	1	0	0	0	1
GCF_003335955	2	457	IC2	2.5	2.5.0	2011	China (Hong kong)	Asia	7	18	KL63(Very high)	OCL1(Very high)	1	1	1	0	1	1	1	0	0	0	1
GCF_003335965	255	940				2006	China (Hong kong)	Asia	5	8	KL72(Perfect)	OCL1(Very high)	1	1	1	0	1	0	0	0	0	0	0
GCF_003336005	2	218	IC2	2.4	2.4.0	2010	China (Hong kong)	Asia	5	13	KL9(High)	OCL1(Good)	1	1	1	0	1	0	0	0	0	0	1
GCF_003336035	New Pasteur ST	684	IC2	2.3	2.3.0	2000	China (Hong kong)	Asia	6	18	KL3(Very high)	OCL1(Very high)	1	1	1	0	1	1	0	0	0	0	1
GCF_003336045	2	208	IC2	2.4	2.4.1	2000	China (Hong kong)	Asia	6	16	KL2(Very high)	OCL1(Very high)	1	1	1	0	1	1	0	0	0	0	1
GCF_003336075	2	208	IC2	2.4	2.4.0	2003	China (Hong kong)	Asia	5	14	KL213(None)	OCL1(Very high)	1	1	0	0	1	1	0	0	0	0	1
GCF_003336085	2	208	IC2	2.4	2.4.10	2011	China (Hong kong)	Asia	8	22	KL2(Good)	OCL1(Very high)	1	1	1	0	1	1	1	0	0	0	1
GCF_003336125	2	939	IC2	2.4	2.4.1	2011	China (Hong kong)	Asia	6	16	KL72(High)	OCL1(Very high)	1	1	1	0	1	1	0	0	0	0	1
GCF_003336155	2	New Oxford ST	IC2	2.3	2.3.2	2004	China (Hong kong)	Asia	5	10	KL2(Very high)	OCL1(Very high)	1	1	1	0	1	0	0	0	0	0	1
GCF_003345235	156	758	IC5			2015	Mexico	North America	5	15	KL9(Very high)	OCL10(Very high)	1	0	1	0	0	1	0	0	0	0	1
GCF_003345795	2	195	IC2	2.5	2.5.6	2015	Pakistan	Asia	7	20	KL3(Good)	OCL1(Very high)	1	1	1	0	1	1	1	0	0	0	1
GCF_003345805	2	1114	IC2	2.3	2.3.2	2013	Pakistan	Asia	6	17	KL25(Very high)	OCL1(Very high)	1	1	1	0	1	1	0	0	0	0	1
GCF_003345835	2	1289	IC2	2.2	2.2.6	2015	Pakistan	Asia	5	15	KL12(Good)	OCL1(Very high)	1	0	1	0	1	1	0	0	0	0	1
GCF_003345845	1	1503	IC1	1.4	1.4.9	2015	Pakistan	Asia	8	19	KL12(Good)	OCL3(Perfect)	1	1	1	0	1	1	1	0	0	0	1
GCF_003345855	2	New Oxford ST	IC2	2.2	2.2.6	2015	Pakistan	Asia	5	14	KL12(Good)	OCL18(Good)	1	0	1	0	1	1	0	0	0	0	1
GCF_003345865	158	499				2015	Pakistan	Asia	7	15	KL6(Good)	OCL1(Very high)	1	0	1	0	0	1	1	1	0	0	0
GCF_003345915	2	1052	IC2	2.2	2.2.6	2015	Pakistan	Asia	5	13	KL12(Good)	OCL1(Good)	1	0	1	0	0	1	0	0	0	0	1
GCF_003345925	158	499				2015	Pakistan	Asia	7	14	KL6(Very high)	OCL1(Good)	1	0	1	0	0	1	1	1	0	0	0
GCF_003345955	2	New Oxford ST	IC2	2.3	2.3.2	2015	Pakistan	Asia	6	16	KL153(Good)	OCL1(Very high)	1	1	1	0	1	0	1	0	0	0	1
GCF_003345965	1	231	IC1	1.4	1.4.1	2013	Pakistan	Asia	7	17	KL17(Very high)	OCL2(Good)	1	0	1	0	0	1	1	0	0	0	1
GCF_003345995	2	452	IC2	2.2	2.2.6	2013	Pakistan	Asia	5	15	KL3(Good)	OCL1(Very high)	1	0	1	0	1	1	0	0	0	0	1
GCF_003346005	1106	1932	IC1	1.4	1.4.1	2015	Pakistan	Asia	7	17	KL12(Very high)	OCL2(Good)	1	0	1	0	0	1	1	0	0	0	1
GCF_003347295	636	502	IC2	2.1	2.1.1	2016	Lebanon	Asia	5	13	KL40(Good)	OCL2(Very high)	1	0	1	0	0	1	0	0	0	0	1
GCF_003347305	2	218	IC2	2.5	2.5.6	2016	Lebanon	Asia	6	18	KL9(Very high)	OCL1(Very high)	1	1	1	0	1	0	1	0	0	0	1
GCF_003347325	2	218	IC2	2.5	2.5.6	2016	Lebanon	Asia	6	18	KL9(Very high)	OCL1(Very high)	1	1	1	0	1	0	1	0	0	0	1
GCF_003347355	1580	195	IC2	2.5	2.5.6	2016	Lebanon	Asia	7	19	KL3(Very high)	OCL1(Very high)	1	1	1	0	1	1	1	0	0	0	1
GCF_003347375	1580	New Oxford ST	IC2	2.5	2.5.6	2016	Lebanon	Asia	7	24	KL40(Good)	OCL1(Good)	1	1	1	0	1	1	1	0	0	0	1
GCF_003347385	2	218	IC2	2.5	2.5.6	2016	Lebanon	Asia	6	18	KL9(Very high)	OCL1(Very high)	1	1	1	0	1	0	1	0	0	0	1
GCF_003347395	2	218	IC2	2.5	2.5.6	2016	Lebanon	Asia	7	19	KL9(Very high)	OCL1(Very high)	1	1	1	0	1	1	1	0	0	0	1
GCF_003347435	636	502	IC2	2.1	2.1.1	2016	Lebanon	Asia	5	13	KL40(Very high)	OCL2(Very high)	1	0	1	0	0	1	0	0	0	0	1
GCF_003352485	2	208	IC2	2.4	2.4.0	2010	China (Taiwan)	Asia	6	15	KL2(Very high)	OCL1(Very high)	1	1	1	0	1	1	0	0	0	0	1
GCF_003352495	2	218	IC2	2.4	2.4.0	2012	China (Taiwan)	Asia	8	22	KL9(Very high)	OCL1(Good)	1	1	1	0	1	1	1	0	0	0	1
GCF_003352525	2	455	IC2	2.4	2.4.14	2013	China (Taiwan)	Asia	8	21	KL10(Very high)	OCL1(Very high)	1	1	1	0	1	1	1	0	0	0	1
GCF_003352535	2	218	IC2	2.4	2.4.14	2013	China (Taiwan)	Asia	7	18	KL9(Very high)	OCL1(Very high)	1	1	0	0	1	1	1	0	0	0	1
GCF_003352595	2	455	IC2	2.4	2.4.11	2010	China (Taiwan)	Asia	8	22	KL10(Good)	OCL1(Good)	1	1	1	0	1	1	1	0	0	0	1
GCF_003352605	2	208	IC2	2.4	2.4.11	2009	China (Taiwan)	Asia	8	20	KL2(Good)	OCL1(Very high)	1	1	1	0	1	1	1	0	0	0	1
GCF_003352615	2	544	IC2	2.4	2.4.0	2009	China (Taiwan)	Asia	8	23	KL2(Very high)	OCL1(Very high)	1	1	1	0	1	1	1	0	0	0	1
GCF_003352665	2	208	IC2	2.4	2.4.14	2009	China (Taiwan)	Asia	8	21	KL2(Very high)	OCL1(Very high)	1	1	1	0	0	1	1	0	0	0	1
GCF_003352675	2	545	IC2	2.4	2.4.14	2009	China (Taiwan)	Asia	8	20	KL116(Low)	OCL1(Very high)	1	1	1	0	1	1	1	0	0	0	1
GCF_003352685	2	455	IC2	2.4	2.4.11	2009	China (Taiwan)	Asia	7	19	KL10(Very high)	OCL1(High)	1	1	1	0	1	0	1	0	0	0	1
GCF_003352725	2	455	IC2	2.4	2.4.11	2010	China (Taiwan)	Asia	8	22	KL10(Good)	OCL1(Very high)	1	1	1	0	1	1	1	0	0	0	1
GCF_003352735	2	208	IC2	2.4	2.4.0	2010	China (Taiwan)	Asia	7	18	KL2(Very high)	OCL1(High)	1	1	1	0	1	0	1	0	0	0	1
GCF_003355585	2	381	IC2	2.4	2.4.7	2012	China	Asia	7	17	KL77(Very high)	OCL1(Very high)	1	0	1	0	1	1	1	0	0	0	1
GCF_003355595	2	381	IC2	2.4	2.4.7	2012	China	Asia	7	17	KL77(Very high)	OCL1(Very high)	1	0	1	0	1	1	1	0	0	0	1
GCF_003355605	2	381	IC2	2.4	2.4.7	2012	China	Asia	7	23	KL77(Very high)	OCL1(Very high)	1	0	1	0	1	1	1	0	0	0	1
GCF_003355665	2	381	IC2	2.4	2.4.7	2012	China	Asia	7	18	KL77(Very high)	OCL1(Very high)	1	0	1	0	1	1	1	0	0	0	1
GCF_003355675	2	381	IC2	2.4	2.4.7	2012	China	Asia	6	17	KL77(Very high)	OCL1(Very high)	1	0	1	0	1	0	1	0	0	0	1
GCF_003355705	2	381	IC2	2.4	2.4.7	2012	China	Asia	6	16	KL77(Perfect)	OCL1(Very high)	1	0	1	0	1	0	1	0	0	0	1
GCF_003355725	2	381	IC2	2.4	2.4.7	2012	China	Asia	6	17	KL77(Very high)	OCL1(Very high)	1	0	1	0	1	0	1	0	0	0	1
GCF_003355745	2	381	IC2	2.4	2.4.7	2012	China	Asia	6	17	KL77(Perfect)	OCL1(Very high)	1	0	1	0	1	0	1	0	0	0	1
GCF_003355755	2	381	IC2	2.4	2.4.7	2011	China	Asia	7	19	KL77(High)	OCL1(Very high)	1	0	1	0	1	1	1	0	0	0	1
GCF_003355785	2	195	IC2	2.5	2.5.6	2012	China	Asia	5	15	KL3(Very high)	OCL1(Very high)	1	1	1	0	1	0	0	0	0	0	1
GCF_003355795	2	195	IC2	2.5	2.5.6	2012	China	Asia	5	15	KL3(Very high)	OCL1(Very high)	1	1	1	0	1	0	0	0	0	0	1
GCF_003355815	2	195	IC2	2.5	2.5.6	2012	China	Asia	5	14	KL3(Very high)	OCL1(Very high)	1	1	1	0	1	0	0	0	0	0	1
GCF_003355845	2	195	IC2	2.5	2.5.6	2012	China	Asia	6	18	KL3(Very high)	OCL1(Very high)	1	1	1	0	1	0	1	0	0	0	1
GCF_003355865	2	195	IC2	2.5	2.5.6	2012	China	Asia	6	18	KL3(Very high)	OCL1(Very high)	1	1	1	0	1	0	1	0	0	0	1
GCF_003355875	2	195	IC2	2.5	2.5.6	2012	China	Asia	6	17	KL3(Very high)	OCL1(Very high)	1	1	1	0	1	0	1	0	0	0	1
GCF_003355885	2	195	IC2	2.5	2.5.6	2012	China	Asia	6	18	KL3(High)	OCL1(Very high)	1	1	1	0	1	0	1	0	0	0	1
GCF_003355915	2	195	IC2	2.5	2.5.6	2012	China	Asia	6	18	KL3(Very high)	OCL1(Very high)	1	1	1	0	1	0	1	0	0	0	1
GCF_003355945	2	195	IC2	2.5	2.5.6	2012	China	Asia	6	18	KL3(High)	OCL1(Very high)	1	1	1	0	1	0	1	0	0	0	1
GCF_003355965	2	195	IC2	2.5	2.5.6	2012	China	Asia	5	14	KL3(Very high)	OCL1(Very high)	1	0	1	0	1	0	1	0	0	0	1
GCF_003355985	2	195	IC2	2.5	2.5.6	2012	China	Asia	6	16	KL3(High)	OCL1(Very high)	1	1	1	0	1	0	1	0	0	0	1
GCF_003355995	2	195	IC2	2.5	2.5.6	2012	China	Asia	6	18	KL3(Very high)	OCL1(Very high)	1	1	1	0	1	0	1	0	0	0	1
GCF_003356025	33	2408				2012	China	Asia	2	4	KL14(Very high)	OCL6(High)	1	0	0	0	0	0	0	0	0	0	0
GCF_003356045	2	195	IC2	2.5	2.5.6	2012	China	Asia	6	18	KL3(Very high)	OCL1(Very high)	1	1	1	0	1	0	1	0	0	0	1
GCF_003356055	2	195	IC2	2.5	2.5.6	2012	China	Asia	6	18	KL3(Very high)	OCL1(Very high)	1	1	1	0	1	0	1	0	0	0	1
GCF_003356085	2	195	IC2	2.5	2.5.6	2012	China	Asia	6	18	KL3(Very high)	OCL1(Very high)	1	1	1	0	1	0	1	0	0	0	1
GCF_003356105	2	195	IC2	2.5	2.5.6	2012	China	Asia	6	18	KL3(Very high)	OCL1(Very high)	1	1	1	0	1	0	1	0	0	0	1
GCF_003356125	2	368	IC2	2.4	2.4.5	2011	China	Asia	8	19	KL34(Very high)	OCL1(Good)	1	1	1	0	1	1	1	0	0	0	1
GCF_003356145	2	368	IC2	2.4	2.4.5	2011	China	Asia	8	19	KL34(Very high)	OCL1(Good)	1	1	1	0	1	1	1	0	0	0	1
GCF_003356155	1644	New Oxford ST	IC2	2.4	2.4.5	2011	China	Asia	6	12	KL34(Very high)	OCL18(None)	1	1	1	0	1	1	0	0	0	0	1
GCF_003356185	2	368	IC2	2.4	2.4.5	2011	China	Asia	8	19	KL34(High)	OCL1(Good)	1	1	1	0	1	1	1	0	0	0	1
GCF_003356205	2	368	IC2	2.4	2.4.5	2011	China	Asia	8	19	KL34(Very high)	OCL1(Good)	1	1	1	0	1	1	1	0	0	0	1
GCF_003356225	2	368	IC2	2.4	2.4.5	2011	China	Asia	8	19	KL34(Very high)	OCL1(Good)	1	1	1	0	1	1	1	0	0	0	1
GCF_003356235	2	368	IC2	2.4	2.4.5	2011	China	Asia	8	19	KL34(High)	OCL1(Good)	1	1	1	0	1	1	1	0	0	0	1
GCF_003356265	2	368	IC2	2.4	2.4.5	2011	China	Asia	8	19	KL34(Very high)	OCL1(Good)	1	1	1	0	1	1	1	0	0	0	1
GCF_003356285	2	368	IC2	2.4	2.4.5	2011	China	Asia	8	19	KL34(Very high)	OCL1(Good)	1	1	1	0	1	1	1	0	0	0	1
GCF_003356295	2	New Oxford ST	IC2	2.4	2.4.5	2012	China	Asia	7	15	KL34(Very high)	OCL1(Very high)	1	1	1	0	1	1	1	0	0	0	1
GCF_003356315	2	368	IC2	2.4	2.4.5	2012	China	Asia	7	15	KL34(Very high)	OCL1(Very high)	1	1	1	0	1	1	1	0	0	0	1
GCF_003356345	2	368	IC2	2.4	2.4.5	2012	China	Asia	7	15	KL34(Very high)	OCL1(Very high)	1	1	1	0	1	1	1	0	0	0	1
GCF_003356365	2	368	IC2	2.4	2.4.5	2012	China	Asia	7	15	KL34(Very high)	OCL1(Very high)	1	1	1	0	1	1	1	0	0	0	1
GCF_003356385	2	368	IC2	2.4	2.4.5	2012	China	Asia	8	20	KL34(High)	OCL1(Very high)	1	1	1	0	1	1	1	0	0	0	1
GCF_003356405	New Pasteur ST	New Oxford ST	IC2	2.4	2.4.5	2012	China	Asia	8	20	KL34(Very high)	OCL1(Very high)	1	1	1	0	1	1	1	0	0	0	1
GCF_003356425	2	368	IC2	2.4	2.4.5	2012	China	Asia	8	20	KL34(Very high)	OCL1(Very high)	1	1	1	0	1	1	1	0	0	0	1
GCF_003356445	2	368	IC2	2.4	2.4.5	2012	China	Asia	8	20	KL34(Good)	OCL1(Very high)	1	1	1	0	1	1	1	0	0	0	1
GCF_003356455	2	368	IC2	2.4	2.4.5	2012	China	Asia	8	20	KL34(Very high)	OCL1(Very high)	1	1	1	0	1	1	1	0	0	0	1
GCF_003356485	2	368	IC2	2.4	2.4.5	2012	China	Asia	8	20	KL34(Very high)	OCL1(Very high)	1	1	1	0	1	1	1	0	0	0	1
GCF_003356505	2	195	IC2	2.5	2.5.6	2013	China	Asia	6	16	KL3(Very high)	OCL1(Very high)	1	1	1	0	1	0	1	0	0	0	1
GCF_003356525	2	195	IC2	2.5	2.5.6	2013	China	Asia	6	18	KL3(High)	OCL1(Very high)	1	1	1	0	1	0	1	0	0	0	1
GCF_003356535	2	195	IC2	2.5	2.5.6	2012	China	Asia	6	18	KL3(Very high)	OCL1(Very high)	1	1	1	0	1	0	1	0	0	0	1
GCF_003356565	2	368	IC2	2.4	2.4.5	2012	China	Asia	8	20	KL34(Very high)	OCL1(Very high)	1	1	1	0	1	1	1	0	0	0	1
GCF_003356575	2	381	IC2	2.4	2.4.7	2012	China	Asia	8	19	KL77(High)	OCL1(Very high)	1	1	1	0	1	1	1	0	0	0	1
GCF_003356605	2	195	IC2	2.5	2.5.6	2012	China	Asia	6	18	KL3(Very high)	OCL1(Very high)	1	1	1	0	1	0	1	0	0	0	1
GCF_003356625	2	New Oxford ST	IC2	2.5	2.5.6	2012	China	Asia	6	18	KL3(High)	OCL1(Very high)	1	1	1	0	1	0	1	0	0	0	1
GCF_003356635	2	195	IC2	2.5	2.5.6	2012	China	Asia	6	18	KL3(Very high)	OCL1(Very high)	1	1	1	0	1	0	1	0	0	0	1
GCF_003356645	2	195	IC2	2.5	2.5.6	2012	China	Asia	6	18	KL3(Very high)	OCL1(Very high)	1	1	1	0	1	0	1	0	0	0	1
GCF_003356685	2	195	IC2	2.5	2.5.6	2012	China	Asia	6	18	KL3(Very high)	OCL1(Very high)	1	1	1	0	1	0	1	0	0	0	1
GCF_003356705	2	218	IC2	2.4	2.4.11	2012	China	Asia	8	19	KL7(Very high)	OCL1(High)	1	1	1	0	1	1	1	0	0	0	1
GCF_003356725	2	218	IC2	2.4	2.4.11	2012	China	Asia	6	14	KL28(Low)	OCL1(Very high)	1	1	1	0	1	0	1	0	0	0	1
GCF_003356745	2	218	IC2	2.4	2.4.11	2012	China	Asia	8	19	KL7(Very high)	OCL1(Very high)	1	1	1	0	1	1	1	0	0	0	1
GCF_003356765	2	218	IC2	2.4	2.4.11	2012	China	Asia	8	19	KL28(Low)	OCL1(Very high)	1	1	1	0	1	1	1	0	0	0	1
GCF_003356785	2	218	IC2	2.4	2.4.11	2012	China	Asia	8	19	KL7(Very high)	OCL1(Very high)	1	1	1	0	1	1	1	0	0	0	1
GCF_003356795	2	218	IC2	2.4	2.4.11	2012	China	Asia	8	19	KL7(Very high)	OCL1(Very high)	1	1	1	0	1	1	1	0	0	0	1
GCF_003356815	2	218	IC2	2.4	2.4.11	2011	China	Asia	8	19	KL7(High)	OCL1(Very high)	1	1	1	0	1	1	1	0	0	0	1
GCF_003356845	2	218	IC2	2.4	2.4.11	2011	China	Asia	8	19	KL7(Very high)	OCL1(Very high)	1	1	1	0	1	1	1	0	0	0	1
GCF_003356865	2	218	IC2	2.4	2.4.11	2011	China	Asia	8	19	KL7(Perfect)	OCL1(Very high)	1	1	1	0	1	1	1	0	0	0	1
GCF_003356875	2	218	IC2	2.4	2.4.11	2011	China	Asia	8	19	KL7(Perfect)	OCL1(Very high)	1	1	1	0	1	1	1	0	0	0	1
GCF_003356905	2	New Oxford ST	IC2	2.4	2.4.11	2011	China	Asia	8	19	KL28(Low)	OCL1(Very high)	1	1	1	0	1	1	1	0	0	0	1
GCF_003356925	2	218	IC2	2.4	2.4.11	2011	China	Asia	8	18	KL7(Perfect)	OCL1(Very high)	1	1	1	0	1	1	1	0	0	0	1
GCF_003356945	2	195	IC2	2.5	2.5.6	2012	China	Asia	6	16	KL3(High)	OCL1(Very high)	1	1	1	0	1	0	1	0	0	0	1
GCF_003356965	2	195	IC2	2.5	2.5.6	2012	China	Asia	6	18	KL3(Very high)	OCL1(Very high)	1	1	1	0	1	0	1	0	0	0	1
GCF_003356975	2	195	IC2	2.5	2.5.6	2012	China	Asia	6	18	KL3(Very high)	OCL1(Very high)	1	1	1	0	1	0	1	0	0	0	1
GCF_003357005	2	195	IC2	2.5	2.5.6	2012	China	Asia	6	18	KL3(Very high)	OCL1(Very high)	1	1	1	0	1	0	1	0	0	0	1
GCF_003357025	2	195	IC2	2.5	2.5.6	2012	China	Asia	6	17	KL3(High)	OCL1(Very high)	1	1	1	0	1	0	1	0	0	0	1
GCF_003357035	2	195	IC2	2.5	2.5.6	2012	China	Asia	6	18	KL3(High)	OCL1(Very high)	1	1	1	0	1	0	1	0	0	0	1
GCF_003357045	2	195	IC2	2.5	2.5.6	2012	China	Asia	6	18	KL3(Very high)	OCL1(Very high)	1	1	1	0	1	0	1	0	0	0	1
GCF_003357085	2	195	IC2	2.5	2.5.6	2012	China	Asia	6	18	KL3(Very high)	OCL1(Very high)	1	1	1	0	1	0	1	0	0	0	1
GCF_003382235	164	1418				2015	Ghana	Africa	6	11	KL47(Good)	OCL5(Very high)	1	1	1	0	0	1	0	0	0	0	0
GCF_003431385	25	490	IC7			2006	Mexico	North America	5	13	KL7(Very high)	OCL7(Very high)	1	0	1	0	0	1	0	0	0	0	1
GCF_003431865	32	1627				Unknown	United States	North America	5	11	KL109(Very high)	OCL6(High)	1	0	1	0	0	1	0	0	0	0	0
GCF_003516005	1544	208	IC2	2.4	2.4.2	2008	Mexico	North America	8	23	KL2(Very high)	OCL1(Very high)	1	1	1	0	1	1	1	0	0	0	1
GCF_003522665	422	934	IC5			2013	Mexico	North America	7	18	KL9(Very high)	OCL10(High)	1	1	1	0	1	1	0	0	0	0	1
GCF_003522705	10	New Oxford ST	IC8			2012	Mexico	North America	6	9	KL77(Perfect)	OCL2(Very high)	1	1	1	0	0	1	0	0	0	0	1
GCF_003522785	2	473	IC2	2.4	2.4.2	2011	Mexico	North America	7	21	KL22(Very high)	OCL1(Very high)	1	1	1	0	1	1	0	0	0	0	1
GCF_003522845	1	231	IC1	1.4	1.4.0	2010	Mexico	North America	5	19	KL1(Very high)	OCL7(Very high)	1	0	1	0	0	1	0	0	0	0	1
GCF_003522885	2	417	IC2	2.4	2.4.2	2009	Mexico	North America	8	22	KL23(Very high)	OCL1(Very high)	1	1	1	0	1	1	1	0	0	0	1
GCF_003547115	32	1627				Unknown	United States	North America	5	11	KL109(Very high)	OCL6(Very high)	1	0	1	0	0	1	0	0	0	0	0
GCF_003569425	239	734				2014	Japan	Asia	2	4	KL52(Very high)	OCL6(Very high)	1	0	0	0	0	0	0	0	0	0	0
GCF_003569445	25	229	IC7			2014	Japan	Asia	4	7	KL14(Good)	OCL14(Perfect)	1	0	1	0	0	0	0	0	0	0	1
GCF_003569625	138	1351				2014	Japan	Asia	3	5	KL139(None)	OCL6(Very high)	1	0	1	0	0	0	0	0	0	0	0
GCF_003569645	911	New Oxford ST				2011	Japan	Asia	2	4	KL134(Very high)	OCL6(Very high)	1	0	0	0	0	0	0	0	0	0	0
GCF_003574715	1158	1592				2010	China	Asia	3	5	KL163(Perfect)	OCL6(Very high)	1	0	1	0	0	0	0	0	0	0	0
GCF_003583525	991	1518	IC7			2016	Bolivia	South America	5	11	KL9(None)	OCL13(None)	1	1	1	0	0	0	0	0	0	0	1
GCF_003583535	25	1489	IC7			2016	Bolivia	South America	6	13	KL150(None)	OCL13(None)	1	1	1	0	0	1	0	0	0	0	1
GCF_003583565	25	1489	IC7			2016	Bolivia	South America	6	15	KL22(None)	OCL13(None)	1	1	1	0	0	1	0	0	0	0	1
GCF_003583575	25	1489	IC7			2016	Bolivia	South America	5	11	KL65(None)	OCL13(None)	1	1	1	0	0	0	0	0	0	0	1
GCF_003583605	25	1489	IC7			2016	Bolivia	South America	4	9	KL22(None)	OCL13(None)	1	0	1	0	0	0	0	0	0	0	1
GCF_003583615	991	New Oxford ST	IC7			2016	Bolivia	South America	5	14	KL9(None)	OCL13(None)	1	1	1	0	0	0	0	0	0	0	1
GCF_003583625	25	1489	IC7			2016	Bolivia	South America	6	15	KL22(None)	OCL13(None)	1	1	1	0	0	1	0	0	0	0	1
GCF_003583665	15	236	IC4			2016	Bolivia	South America	5	14	KL9(None)	OCL7(Good)	1	0	1	0	1	1	0	0	0	0	1
GCF_003584255	25	1489	IC7			2016	Bolivia	South America	6	15	KL22(Good)	OCL13(Good)	1	1	1	0	0	1	0	0	0	0	1
GCF_003584275	25	1489	IC7			2016	Bolivia	South America	6	15	KL22(Good)	OCL5(Good)	1	1	1	0	0	1	0	0	0	0	1
GCF_003584305	25	New Oxford ST	IC7			2016	Bolivia	South America	5	11	KL3(None)	OCL13(Good)	1	1	1	0	0	0	0	0	0	0	1
GCF_003584315	25	1489	IC7			2016	Bolivia	South America	6	15	KL22(Good)	OCL13(Good)	1	1	1	0	0	1	0	0	0	0	1
GCF_003584325	25	1489	IC7			2016	Bolivia	South America	5	13	KL160(None)	OCL13(None)	1	1	1	0	0	0	0	0	0	0	1
GCF_003584365	25	1489	IC7			2016	Bolivia	South America	5	11	KL150(None)	OCL13(None)	1	1	1	0	0	0	0	0	0	0	1
GCF_003584375	25	1528	IC7			2016	Bolivia	South America	6	15	KL49(None)	OCL13(None)	1	1	1	0	0	1	0	0	0	0	1
GCF_003584385	25	1519	IC7			2016	Bolivia	South America	6	15	KL33(Good)	OCL13(None)	1	1	1	0	0	1	0	0	0	0	1
GCF_003584425	25	1489	IC7			2016	Bolivia	South America	6	15	KL22(Good)	OCL5(Very high)	1	1	1	0	0	1	0	0	0	0	1
GCF_003584445	25	1489	IC7			2016	Bolivia	South America	5	14	KL22(None)	OCL13(None)	1	1	1	0	0	0	0	0	0	0	1
GCF_003584455	25	1528	IC7			2016	Bolivia	South America	5	10	KL49(None)	OCL13(Low)	1	1	1	0	0	0	0	0	0	0	1
GCF_003584485	25	1519	IC7			2016	Bolivia	South America	6	15	KL33(Very high)	OCL13(Good)	1	1	1	0	0	1	0	0	0	0	1
GCF_003584505	991	1518	IC7			2016	Bolivia	South America	3	8	KL9(Very high)	OCL5(Good)	1	0	0	0	0	0	0	0	0	0	1
GCF_003584515	25	1489	IC7			2016	Bolivia	South America	6	15	KL22(Good)	OCL13(Good)	1	1	1	0	0	1	0	0	0	0	1
GCF_003584535	991	1518	IC7			2016	Bolivia	South America	6	15	KL9(Good)	OCL13(Good)	1	1	1	0	0	1	0	0	0	0	1
GCF_003591615	922	368	IC2	2.3	2.3.3	2016	China	Asia	7	16	KL34(Very high)	OCL1(Very high)	1	1	1	0	1	1	1	0	0	0	1
GCF_003595665	25	1519	IC7			2016	Bolivia	South America	5	11	KL33(Low)	OCL13(Low)	1	1	1	0	0	0	0	0	0	0	1
GCF_003595675	25	1519	IC7			2016	Bolivia	South America	6	15	KL165(None)	OCL13(None)	1	1	1	0	0	1	0	0	0	0	1
GCF_003595685	25	1519	IC7			2016	Bolivia	South America	6	14	KL33(Low)	OCL13(Good)	1	1	1	0	0	1	0	0	0	0	1
GCF_003595745	991	1518	IC7			2016	Bolivia	South America	5	14	KL9(Good)	OCL5(Good)	1	1	0	0	0	1	0	0	0	0	1
GCF_003595755	991	1518	IC7			2016	Bolivia	South America	5	14	KL9(None)	OCL13(Good)	1	1	0	0	0	1	0	0	0	0	1
GCF_003595765	25	1519	IC7			2016	Bolivia	South America	5	11	KL33(Good)	OCL13(Low)	1	1	1	0	0	0	0	0	0	0	1
GCF_003595805	991	1518	IC7			2016	Bolivia	South America	4	13	KL9(None)	OCL13(None)	1	1	0	0	0	0	0	0	0	0	1
GCF_003595815	25	1529	IC7			2016	Bolivia	South America	6	15	KL37(Low)	OCL10(Good)	1	1	1	0	0	1	0	0	0	0	1
GCF_003595835	991	1518	IC7			2016	Bolivia	South America	4	10	KL9(None)	OCL5(Good)	1	0	1	0	0	0	0	0	0	0	1
GCF_003595865	25	1529	IC7			2016	Bolivia	South America	4	9	KL37(None)	OCL10(Good)	1	0	1	0	0	0	0	0	0	0	1
GCF_003595875	79	233	IC5			2016	Bolivia	South America	8	18	KL9(None)	OCL10(Good)	1	0	1	0	1	1	0	1	0	0	1
GCF_003595885	991	1518	IC7			2016	Bolivia	South America	6	15	KL9(None)	OCL13(None)	1	1	1	0	0	1	0	0	0	0	1
GCF_003595925	25	1519	IC7			2016	Bolivia	South America	6	15	KL165(Good)	OCL13(Good)	1	1	1	0	0	1	0	0	0	0	1
GCF_003595935	25	1489	IC7			2016	Bolivia	South America	6	15	KL22(None)	OCL13(Low)	1	1	1	0	0	1	0	0	0	0	1
GCF_003595955	25	1489	IC7			2016	Bolivia	South America	5	14	KL22(None)	OCL13(None)	1	1	1	0	0	0	0	0	0	0	1
GCF_003595985	79	1520	IC5			2016	Bolivia	South America	8	18	KL22(Good)	OCL10(Good)	1	0	1	0	1	1	0	1	0	0	1
GCF_003595995	991	1518	IC7			2016	Bolivia	South America	5	14	KL9(None)	OCL13(None)	1	1	0	0	0	1	0	0	0	0	1
GCF_003596015	991	1518	IC7			2016	Bolivia	South America	3	8	KL9(None)	OCL13(None)	1	0	0	0	0	0	0	0	0	0	1
GCF_003596025	991	1518	IC7			2015	Bolivia	South America	5	14	KL9(Good)	OCL13(Good)	1	1	0	0	0	1	0	0	0	0	1
GCF_003596065	991	1518	IC7			2015	Bolivia	South America	6	15	KL9(None)	OCL13(Good)	1	1	1	0	0	1	0	0	0	0	1
GCF_003596075	991	1518	IC7			2015	Bolivia	South America	6	15	KL9(Very high)	OCL5(Very high)	1	1	1	0	0	1	0	0	0	0	1
GCF_003596105	991	1518	IC7			2015	Bolivia	South America	5	14	KL9(None)	OCL13(None)	1	1	0	0	0	1	0	0	0	0	1
GCF_003596125	25	1529	IC7			2016	Bolivia	South America	4	9	KL37(None)	OCL10(High)	1	0	1	0	0	0	0	0	0	0	1
GCF_003596135	25	1519	IC7			2016	Bolivia	South America	6	14	KL165(None)	OCL13(None)	1	1	1	0	0	1	0	0	0	0	1
GCF_003596165	267	942				2016	Bolivia	South America	6	14	KL9(Good)	OCL2(High)	1	1	1	0	1	1	0	0	0	0	0
GCF_003596175	25	1528	IC7			2016	Bolivia	South America	5	11	KL49(None)	OCL13(None)	1	1	1	0	0	0	0	0	0	0	1
GCF_003596205	25	1519	IC7			2016	Bolivia	South America	4	9	KL235(Good)	OCL13(None)	1	0	1	0	0	0	0	0	0	0	1
GCF_003596215	79	233	IC5			2016	Bolivia	South America	8	18	KL9(None)	OCL10(Good)	1	0	1	0	1	1	0	1	0	0	1
GCF_003596235	25	1519	IC7			2016	Bolivia	South America	6	15	KL33(Very high)	OCL5(Good)	1	1	1	0	0	1	0	0	0	0	1
GCF_003596265	991	1518	IC7			2016	Bolivia	South America	6	14	KL9(None)	OCL13(None)	1	1	1	0	0	1	0	0	0	0	1
GCF_003596275	991	1518	IC7			2015	Bolivia	South America	6	15	KL9(None)	OCL13(Good)	1	1	1	0	0	1	0	0	0	0	1
GCF_003597385	991	1518	IC7			2015	Bolivia	South America	6	14	KL9(None)	OCL13(Good)	1	1	1	0	0	1	0	0	0	0	1
GCF_003615295	1153	1621	IC8			2016	Togo	Africa	6	11	KL136(None)	OCL2(Good)	1	1	1	0	0	1	0	0	0	0	1
GCF_003615305	1	231	IC1	1.4	1.4.4	2016	Togo	Africa	9	21	KL17(Good)	OCL1(Very high)	1	1	1	0	0	1	0	1	0	0	1
GCF_003627405	2	New Oxford ST	IC2	2.4	2.4.14	2017	India	Asia	9	23	KL12(High)	OCL1(Very high)	1	1	1	0	0	1	1	0	0	0	1
GCF_003627455	2	2282	IC2	2.4	2.4.14	2017	India	Asia	8	20	KL234(Good)	OCL1(Very high)	1	1	1	0	0	1	1	0	0	0	1
GCF_003627465	1	231	IC1	1.4	1.4.1	2017	India	Asia	7	18	KL17(High)	OCL5(Very high)	1	0	1	0	0	1	1	0	0	0	1
GCF_003627515	2	349	IC2	2.4	2.4.14	2017	India	Asia	10	25	KL12(High)	OCL1(High)	1	1	1	0	0	1	1	0	0	0	1
GCF_003670075	1	231	IC1	1.4	1.4.4	2016	Togo	Africa	9	20	KL17(Low)	OCL1(Good)	1	1	1	0	0	1	0	1	0	0	1
GCF_003697885	108	New Oxford ST				2013	Brazil	South America	4	6	KL155(Very high)	OCL1(Very high)	1	0	1	0	0	0	0	0	0	0	0
GCF_003711855	2	2282	IC2	2.4	2.4.14	2017	India	Asia	9	22	KL234(Good)	OCL1(Very high)	1	1	1	0	0	1	1	0	0	0	1
GCF_003711885	1	231	IC1	1.4	1.4.1	2017	India	Asia	7	17	KL17(High)	OCL5(Very high)	1	0	1	0	0	1	1	0	0	0	1
GCF_003711895	2	195	IC2	2.5	2.5.6	2017	India	Asia	7	17	KL3(Good)	OCL1(Very high)	1	1	1	0	1	1	1	0	0	0	1
GCF_003711945	2	349	IC2	2.4	2.4.14	2017	India	Asia	10	25	KL12(High)	OCL1(Very high)	1	1	1	0	1	1	1	0	0	0	1
GCF_003711985	2	2282	IC2	2.4	2.4.14	2017	India	Asia	9	23	KL234(Good)	OCL1(Very high)	1	1	1	0	0	1	1	0	0	0	1
GCF_003721135	40	373				2016	China	Asia	2	5	KL47(Very high)	OCL6(Very high)	1	0	0	0	0	0	0	0	0	0	0
GCF_003812065	1542	2198				Unknown	United States	North America	2	4	KL178(Perfect)	OCL5(Very high)	1	0	0	0	0	0	0	0	0	0	0
GCF_003812385	57	New Oxford ST				2016	United States	North America	3	6	KL37(Very high)	OCL6(Very high)	1	0	1	0	0	0	0	0	0	0	0
GCF_003812485	79	233	IC5			2008	Brazil	South America	9	27	KL49(Very high)	OCL10(High)	1	0	1	1	1	1	0	1	0	0	1
GCF_003843745	2	208	IC2	2.4	2.4.2	2012	South Korea	Asia	5	11	KL2(High)	OCL1(Good)	1	1	1	0	0	0	0	0	0	0	1
GCF_003863935	2	218	IC2	2.2	2.2.5	2004	Spain	Europe	5	13	KL42(Very high)	OCL1(Good)	1	1	1	0	1	0	0	0	0	0	1
GCF_002950855	2	208	IC2	2.4	2.4.12	2010	United States	North America	8	22	KL213(None)	OCL1(Good)	1	1	1	0	1	1	1	0	0	0	1
GCF_002950895	2	281	IC2	2.2	2.2.4	2011	United States	North America	5	12	KL22(Good)	OCL3(Very high)	1	0	1	0	1	1	0	0	0	0	1
GCF_002950915	2	208	IC2	2.4	2.4.12	2012	United States	North America	8	21	KL213(None)	OCL1(Very high)	1	1	1	0	1	1	1	0	0	0	1
GCF_002950925	2	281	IC2	2.2	2.2.4	2011	United States	North America	6	17	KL22(None)	OCL3(Good)	1	0	1	0	1	1	1	0	0	0	1
GCF_003939415	187	1289	IC2	2.2	2.2.6	2016	Pakistan	Asia	5	15	KL12(Very high)	OCL1(Very high)	1	0	1	0	1	1	0	0	0	0	1
GCF_003939445	1253	1052	IC2	2.2	2.2.6	2016	Pakistan	Asia	5	16	KL12(Very high)	OCL1(Very high)	1	0	1	0	1	1	0	0	0	0	1
GCF_003939465	2	208	IC2	2.5	2.5.6	2016	Pakistan	Asia	6	18	KL2(Very high)	OCL1(Very high)	1	1	1	0	1	0	1	0	0	0	1
GCF_003939475	1253	1052	IC2	2.2	2.2.6	2016	Pakistan	Asia	5	16	KL12(Very high)	OCL1(Very high)	1	0	1	0	1	1	0	0	0	0	1
GCF_003939505	2	208	IC2	2.5	2.5.6	2016	Pakistan	Asia	6	19	KL2(Very high)	OCL1(Very high)	1	1	1	0	1	0	1	0	0	0	1
GCF_003939525	2	557	IC2	2.2	2.2.6	2016	Pakistan	Asia	5	15	KL152(Perfect)	OCL1(Very high)	1	0	1	0	1	1	0	0	0	0	1
GCF_003939545	1253	1052	IC2	2.2	2.2.6	2016	Pakistan	Asia	5	16	KL12(Very high)	OCL1(Very high)	1	0	1	0	1	1	0	0	0	0	1
GCF_003939565	2146	New Oxford ST				2016	Pakistan	Asia	2	4	KL83(Very high)	OCL8(Very high)	1	0	0	0	0	0	0	0	0	0	0
GCF_003939585	145	New Oxford ST				2016	Pakistan	Asia	2	4	KL117(Good)	OCL6(Very high)	1	0	0	0	0	0	0	0	0	0	0
GCF_003939595	145	New Oxford ST				2016	Pakistan	Asia	2	4	KL117(Good)	OCL6(Very high)	1	0	0	0	0	0	0	0	0	0	0
GCF_003939625	2	195	IC2	2.5	2.5.6	2016	Pakistan	Asia	6	19	KL3(Very high)	OCL1(Very high)	1	1	1	0	1	0	1	0	0	0	1
GCF_003939645	2	1289	IC2	2.5	2.5.6	2016	Pakistan	Asia	7	24	KL13(Very high)	OCL1(Very high)	1	0	1	0	1	1	1	0	0	0	1
GCF_003939655	2	218	IC2	2.5	2.5.6	2016	Pakistan	Asia	6	19	KL9(Very high)	OCL1(Very high)	1	1	1	0	1	0	1	0	0	0	1
GCF_002950975	2	208	IC2	2.4	2.4.2	2011	United States	North America	8	23	KL213(None)	OCL1(Very high)	1	1	1	0	1	1	1	0	0	0	1
GCF_003939935	1253	1052	IC2	2.2	2.2.6	2016	Pakistan	Asia	5	16	KL12(Very high)	OCL1(Very high)	1	0	1	0	1	1	0	0	0	0	1
GCF_003939955	1253	1052	IC2	2.2	2.2.6	2016	Pakistan	Asia	5	16	KL12(Very high)	OCL1(Very high)	1	0	1	0	1	1	0	0	0	0	1
GCF_003939985	2	1114	IC2	2.3	2.3.2	2016	Pakistan	Asia	6	18	KL25(Very high)	OCL1(Very high)	1	1	1	0	1	1	0	0	0	0	1
GCF_003940005	187	1289	IC2	2.2	2.2.6	2016	Pakistan	Asia	5	15	KL12(Very high)	OCL1(Very high)	1	0	1	0	1	1	0	0	0	0	1
GCF_003940015	1253	1052	IC2	2.2	2.2.6	2016	Pakistan	Asia	5	16	KL12(Very high)	OCL1(Very high)	1	0	1	0	1	1	0	0	0	0	1
GCF_003940045	New Pasteur ST	New Oxford ST				2016	Pakistan	Asia	3	4	KL14(Very high)	OCL5(Very high)	1	0	1	0	0	0	0	0	0	0	0
GCF_003940065	2	451	IC2	2.5	2.5.6	2016	Pakistan	Asia	6	19	KL6(Very high)	OCL1(Very high)	1	1	1	0	1	0	1	0	0	0	1
GCF_003940075	1	1503	IC1	1.4	1.4.9	2016	Pakistan	Asia	8	17	KL12(Very high)	OCL3(Perfect)	1	1	1	0	0	1	1	0	0	0	1
GCF_003940105	52	931				2016	Pakistan	Asia	7	15	KL3(Very high)	OCL1(Very high)	1	1	1	0	0	1	0	1	0	0	0
GCF_003940125	2	218	IC2	2.5	2.5.6	2016	Pakistan	Asia	6	19	KL9(Very high)	OCL1(Very high)	1	1	1	0	1	0	1	0	0	0	1
GCF_003940135	2	218	IC2	2.5	2.5.6	2016	Pakistan	Asia	6	19	KL9(Very high)	OCL1(Very high)	1	1	1	0	1	0	1	0	0	0	1
GCF_002950995	2	208	IC2	2.4	2.4.2	2011	United States	North America	7	16	KL2(Very high)	OCL1(Very high)	1	1	1	0	1	1	1	0	0	0	1
GCF_003940335	2	1114	IC2	2.3	2.3.2	2016	Pakistan	Asia	6	14	KL25(Very high)	OCL1(Very high)	1	1	1	0	1	1	0	0	0	0	1
[truncated: 13,645 more rows]
