# Supplementary material for: Emergence and Global Spread of a Dominant Multidrug-Resistant Variant in Acinetobacter baumannii
Source: Research Square preprint supplement (doi:10.21203/rs.3.rs-4224555/v1), 2024-04-11
Supplement: Supplementary file 4 [file e26d36fc76d36354bb565d92.xlsx]

## Sheet: Sheet1
Supplementary Data 3. A list of blaADC variants and their family assignments, related to Figures 1 and 3.
#Allele	Gene	family	Product	name	Class	Subclass	RefSeq	protein	nucleotide	ADC-30 family
blaADC-33	blaADC	cefepime-hydrolyzing	class C beta-lactamase	ADC-33	BETA-LACTAM	CEPHALOSPORIN	WP_001211220.1	NG_056059.1	NG_056059.1_1-1155	TRUE
blaADC-100	blaADC	extended-spectrum	class C beta-lactamase	ADC-100	BETA-LACTAM	CEPHALOSPORIN	WP_068981607.1	NG_051439.1	NG_051439.1_1-1158	TRUE
blaADC-109	blaADC	extended-spectrum	class C beta-lactamase	ADC-109	BETA-LACTAM	CEPHALOSPORIN	WP_136512052.1	NG_064669.1	NG_064669.1_101-1252	TRUE
blaADC-110	blaADC	extended-spectrum	class C beta-lactamase	ADC-110	BETA-LACTAM	CEPHALOSPORIN	WP_136512053.1	NG_064670.1	NG_064670.1_1-1152	TRUE
blaADC-112	blaADC	extended-spectrum	class C beta-lactamase	ADC-112	BETA-LACTAM	CEPHALOSPORIN	WP_136512054.1	NG_064671.1	NG_064671.1_1-1152	TRUE
blaADC-113	blaADC	extended-spectrum	class C beta-lactamase	ADC-113	BETA-LACTAM	CEPHALOSPORIN	WP_136512055.1	NG_064672.1	NG_064672.1_1-1152	TRUE
blaADC-114	blaADC	extended-spectrum	class C beta-lactamase	ADC-114	BETA-LACTAM	CEPHALOSPORIN	WP_125052776.1	NG_064673.1	NG_064673.1_31-1185	TRUE
blaADC-115	blaADC	extended-spectrum	class C beta-lactamase	ADC-115	BETA-LACTAM	CEPHALOSPORIN	WP_001211215.1	NG_064674.1	NG_064674.1_101-1252	TRUE
blaADC-139	blaADC	extended-spectrum	class C beta-lactamase	ADC-139	BETA-LACTAM	CEPHALOSPORIN	WP_032039838.1	NG_064695.1	NG_064695.1_101-1252	TRUE
blaADC-140	blaADC	extended-spectrum	class C beta-lactamase	ADC-140	BETA-LACTAM	CEPHALOSPORIN	WP_001211209.1	NG_064696.1	NG_064696.1_101-1252	TRUE
blaADC-141	blaADC	extended-spectrum	class C beta-lactamase	ADC-141	BETA-LACTAM	CEPHALOSPORIN	WP_032062810.1	NG_064697.1	NG_064697.1_101-1252	TRUE
blaADC-143	blaADC	extended-spectrum	class C beta-lactamase	ADC-143	BETA-LACTAM	CEPHALOSPORIN	WP_033502167.1	NG_064698.1	NG_064698.1_101-1252	TRUE
blaADC-144	blaADC	cefepime-hydrolyzing	class C beta-lactamase	ADC-144	BETA-LACTAM	CEPHALOSPORIN	WP_001211214.1	NG_064699.1	NG_064699.1_101-1252	TRUE
blaADC-145	blaADC	extended-spectrum	class C beta-lactamase	ADC-145	BETA-LACTAM	CEPHALOSPORIN	WP_039270258.1	NG_064700.1	NG_064700.1_9-1160	TRUE
blaADC-146	blaADC	extended-spectrum	class C beta-lactamase	ADC-146	BETA-LACTAM	CEPHALOSPORIN	WP_039258389.1	NG_064701.1	NG_064701.1_66-1217	TRUE
blaADC-147	blaADC	extended-spectrum	class C beta-lactamase	ADC-147	BETA-LACTAM	CEPHALOSPORIN	WP_044718369.1	NG_064702.1	NG_064702.1_85-1236	TRUE
blaADC-171	blaADC	cefepime-hydrolyzing	class C beta-lactamase	ADC-171	BETA-LACTAM	CEPHALOSPORIN	WP_031961878.1	NG_056163.1	NG_056163.1_101-1255	TRUE
blaADC-172	blaADC	cefepime-hydrolyzing	class C beta-lactamase	ADC-172	BETA-LACTAM	CEPHALOSPORIN	WP_032027415.1	NG_056162.1	NG_056162.1_101-1255	TRUE
blaADC-173	blaADC	cefepime-hydrolyzing	class C beta-lactamase	ADC-173	BETA-LACTAM	CEPHALOSPORIN	WP_032071188.1	NG_056164.1	NG_056164.1_101-1255	TRUE
blaADC-177	blaADC	cefepime-hydrolyzing	class C beta-lactamase	ADC-177	BETA-LACTAM	CEPHALOSPORIN	WP_114699269.1	NG_061393.1	NG_061393.1_1-1152	TRUE
blaADC-178	blaADC	extended-spectrum	class C beta-lactamase	ADC-178	BETA-LACTAM	CEPHALOSPORIN	WP_114699270.1	NG_061394.1	NG_061394.1_1-1152	TRUE
blaADC-188	blaADC	extended-spectrum	class C beta-lactamase	ADC-188	BETA-LACTAM	CEPHALOSPORIN	WP_136512057.1	NG_064711.1	NG_064711.1_1-1152	TRUE
blaADC-197	blaADC	extended-spectrum	class C beta-lactamase	ADC-197	BETA-LACTAM	CEPHALOSPORIN	WP_150823452.1	NG_066477.1	NG_066477.1_1-1152	TRUE
blaADC-198	blaADC	extended-spectrum	class C beta-lactamase	ADC-198	BETA-LACTAM	CEPHALOSPORIN	WP_150823453.1	NG_066478.1	NG_066478.1_1-1155	TRUE
blaADC-1	blaADC	extended-spectrum	class C beta-lactamase	ADC-1	BETA-LACTAM	CEPHALOSPORIN	WP_004714775.1	NG_048633.1	NG_048633.1_1-1152	TRUE
blaADC-200	blaADC	extended-spectrum	class C beta-lactamase	ADC-200	BETA-LACTAM	CEPHALOSPORIN	WP_150823454.1	NG_066480.1	NG_066480.1_1-1152	TRUE
blaADC-212	blaADC	extended-spectrum	class C beta-lactamase	ADC-212	BETA-LACTAM	CEPHALOSPORIN	WP_031975357.1	NG_066492.1	NG_066492.1_86-1240	TRUE
blaADC-213	blaADC	extended-spectrum	class C beta-lactamase	ADC-213	BETA-LACTAM	CEPHALOSPORIN	WP_078230092.1	NG_066493.1	NG_066493.1_100-1254	TRUE
blaADC-217	blaADC	extended-spectrum	class C beta-lactamase	ADC-217	BETA-LACTAM	CEPHALOSPORIN	WP_060470109.1	NG_066497.1	NG_066497.1_87-1238	TRUE
blaADC-219	blaADC	cefepime-hydrolyzing	class C beta-lactamase	ADC-219	BETA-LACTAM	CEPHALOSPORIN	WP_039213353.1	NG_066499.1	NG_066499.1_101-1255	TRUE
blaADC-220	blaADC	extended-spectrum	class C beta-lactamase	ADC-220	BETA-LACTAM	CEPHALOSPORIN	WP_087876534.1	NG_066500.1	NG_066500.1_87-1238	TRUE
blaADC-223	blaADC	extended-spectrum	class C beta-lactamase	ADC-223	BETA-LACTAM	CEPHALOSPORIN	WP_064987478.1	NG_067194.1	NG_067194.1_1-1149	TRUE
blaADC-224	blaADC	cefepime-hydrolyzing	class C beta-lactamase	ADC-224	BETA-LACTAM	CEPHALOSPORIN	WP_064907831.1	NG_067195.1	NG_067195.1_1-1155	TRUE
blaADC-225	blaADC	cefepime-hydrolyzing	class C beta-lactamase	ADC-225	BETA-LACTAM	CEPHALOSPORIN	WP_160164833.1	NG_067196.1	NG_067196.1_1-1155	TRUE
blaADC-226	blaADC	extended-spectrum	class C beta-lactamase	ADC-226	BETA-LACTAM	CEPHALOSPORIN	WP_001211224.1	NG_067197.1	NG_067197.1_1-1152	TRUE
blaADC-228	blaADC	cefepime-hydrolyzing	class C beta-lactamase	ADC-228	BETA-LACTAM	CEPHALOSPORIN	WP_160164835.1	NG_067199.1	NG_067199.1_1-1155	TRUE
blaADC-229	blaADC	extended-spectrum	class C beta-lactamase	ADC-229	BETA-LACTAM	CEPHALOSPORIN	WP_160164836.1	NG_067200.1	NG_067200.1_1-1152	TRUE
blaADC-231	blaADC	extended-spectrum	class C beta-lactamase	ADC-231	BETA-LACTAM	CEPHALOSPORIN	WP_160164838.1	NG_067202.1	NG_067202.1_1-1152	TRUE
blaADC-232	blaADC	cefepime-hydrolyzing	class C beta-lactamase	ADC-232	BETA-LACTAM	CEPHALOSPORIN	WP_064907116.1	NG_067203.1	NG_067203.1_1-1155	TRUE
blaADC-233	blaADC	cefepime-hydrolyzing	class C beta-lactamase	ADC-233	BETA-LACTAM	CEPHALOSPORIN	WP_031950434.1	NG_067204.1	NG_067204.1_1-1155	TRUE
blaADC-250	blaADC	extended-spectrum	class C beta-lactamase	ADC-250	BETA-LACTAM	CEPHALOSPORIN	WP_086329657.1	NG_071196.1	NG_071196.1_87-1241	TRUE
blaADC-25	blaADC	extended-spectrum	class C beta-lactamase	ADC-25	BETA-LACTAM	CEPHALOSPORIN	WP_001211217.1	NG_048649.1	NG_048649.1_1-1152	TRUE
blaADC-260	blaADC	extended-spectrum	class C beta-lactamase	ADC-260	BETA-LACTAM	CEPHALOSPORIN	WP_231869648.1	NG_078049.1	NG_078049.1_1-1152	TRUE
blaADC-261	blaADC	cefepime-hydrolyzing	class C beta-lactamase	ADC-261	BETA-LACTAM	CEPHALOSPORIN	WP_240067715.1	NG_079219.1	NG_079219.1_1-1152	TRUE
blaADC-268	blaADC	extended-spectrum	class C beta-lactamase	ADC-268	BETA-LACTAM	CEPHALOSPORIN	WP_105922788.1	NG_081678.1	NG_081678.1_1-1152	TRUE
blaADC-293	blaADC	extended-spectrum	class C beta-lactamase	ADC-293	BETA-LACTAM	CEPHALOSPORIN	WP_279240769.1	NG_156961.1	NG_156961.1_1-1152	TRUE
blaADC-294	blaADC	extended-spectrum	class C beta-lactamase	ADC-294	BETA-LACTAM	CEPHALOSPORIN	WP_279240770.1	NG_156962.1	NG_156962.1_1-1152	TRUE
blaADC-30	blaADC	extended-spectrum	class C beta-lactamase	ADC-30	BETA-LACTAM	CEPHALOSPORIN	WP_001211218.1	NG_048652.1	NG_048652.1_1-1152	TRUE
blaADC-31	blaADC	extended-spectrum	class C beta-lactamase	ADC-31	BETA-LACTAM	CEPHALOSPORIN	WP_001211223.1	NG_050716.1	NG_050716.1_101-1252	TRUE
blaADC-337	blaADC	extended-spectrum	class C beta-lactamase	ADC-337	BETA-LACTAM	CEPHALOSPORIN	WP_304486997.1	NG_228666.1	NG_228666.1_1-1155	TRUE
blaADC-56	blaADC	cefepime-hydrolyzing	class C beta-lactamase	ADC-56	BETA-LACTAM	CEPHALOSPORIN	WP_031973850.1	NG_048666.1	NG_048666.1_101-1252	TRUE
blaADC-59	blaADC	extended-spectrum	class C beta-lactamase	ADC-59	BETA-LACTAM	CEPHALOSPORIN	WP_063857809.1	NG_048668.1	NG_048668.1_1-1152	TRUE
blaADC-60	blaADC	extended-spectrum	class C beta-lactamase	ADC-60	BETA-LACTAM	CEPHALOSPORIN	WP_063857810.1	NG_048670.1	NG_048670.1_1-1152	TRUE
blaADC-61	blaADC	extended-spectrum	class C beta-lactamase	ADC-61	BETA-LACTAM	CEPHALOSPORIN	WP_033503051.1	NG_048671.1	NG_048671.1_1-1152	TRUE
blaADC-62	blaADC	extended-spectrum	class C beta-lactamase	ADC-62	BETA-LACTAM	CEPHALOSPORIN	WP_063857811.1	NG_048672.1	NG_048672.1_1-1152	TRUE
blaADC-65	blaADC	extended-spectrum	class C beta-lactamase	ADC-65	BETA-LACTAM	CEPHALOSPORIN	WP_136512062.1	NG_064718.1	NG_064718.1_1-1158	TRUE
blaADC-67	blaADC	extended-spectrum	class C beta-lactamase	ADC-67	BETA-LACTAM	CEPHALOSPORIN	WP_063857814.1	NG_048675.1	NG_048675.1_1-1152	TRUE
blaADC-73	blaADC	extended-spectrum	class C beta-lactamase	ADC-73	BETA-LACTAM	CEPHALOSPORIN	WP_001211219.1	NG_048678.1	NG_048678.1_1-1152	TRUE
blaADC-75	blaADC	extended-spectrum	class C beta-lactamase	ADC-75	BETA-LACTAM	CEPHALOSPORIN	WP_063857817.1	NG_048680.1	NG_048680.1_1-1152	TRUE
blaADC-78	blaADC	extended-spectrum	class C beta-lactamase	ADC-78	BETA-LACTAM	CEPHALOSPORIN	WP_057691006.1	NG_048683.1	NG_048683.1_1-1152	TRUE
blaADC-82	blaADC	extended-spectrum	class C beta-lactamase	ADC-82	BETA-LACTAM	CEPHALOSPORIN	WP_001211216.1	NG_050718.1	NG_050718.1_101-1252	TRUE
blaADC-153	blaADC	extended-spectrum	class C beta-lactamase	ADC-153	BETA-LACTAM	CEPHALOSPORIN	WP_099156045.1	NG_055657.1	NG_055657.1_1-1152	TRUE
blaADC-162	blaADC	extended-spectrum	class C beta-lactamase	ADC-162	BETA-LACTAM	CEPHALOSPORIN	WP_031980335.1	NG_056060.1	NG_056060.1_1-1152	TRUE
blaADC-339	blaADC	extended-spectrum	class C beta-lactamase	ADC-339	BETA-LACTAM	CEPHALOSPORIN	WP_311033302.1	NG_231536.1	NG_231536.1_1-1167
blaADC-340	blaADC	extended-spectrum	class C beta-lactamase	ADC-340	BETA-LACTAM	CEPHALOSPORIN	WP_311033303.1	NG_231537.1	NG_231537.1_1-1170
blaADC-341	blaADC	extended-spectrum	class C beta-lactamase	ADC-341	BETA-LACTAM	CEPHALOSPORIN	WP_311033304.1	NG_231538.1	NG_231538.1_1-1152
blaADC-342	blaADC	extended-spectrum	class C beta-lactamase	ADC-342	BETA-LACTAM	CEPHALOSPORIN	WP_225519091.1	NG_231539.1	NG_231539.1_1-1152
blaADC-343	blaADC	extended-spectrum	class C beta-lactamase	ADC-343	BETA-LACTAM	CEPHALOSPORIN	WP_032035727.1	NG_231540.1	NG_231540.1_1-1152
blaADC-38	blaADC	extended-spectrum	class C beta-lactamase	ADC-38	BETA-LACTAM	CEPHALOSPORIN	WP_063857799.1	NG_048653.1	NG_048653.1_1-1152
blaADC-39	blaADC	extended-spectrum	class C beta-lactamase	ADC-39	BETA-LACTAM	CEPHALOSPORIN	WP_063857800.1	NG_048654.1	NG_048654.1_1-1152
blaADC-3	blaADC	extended-spectrum	class C beta-lactamase	ADC-3	BETA-LACTAM	CEPHALOSPORIN	WP_063857798.1	NG_048651.1	NG_048651.1_1-1152
blaADC-41	blaADC	extended-spectrum	class C beta-lactamase	ADC-41	BETA-LACTAM	CEPHALOSPORIN	WP_063857802.1	NG_048656.1	NG_048656.1_1-1152
blaADC-42	blaADC	extended-spectrum	class C beta-lactamase	ADC-42	BETA-LACTAM	CEPHALOSPORIN	WP_063857803.1	NG_048657.1	NG_048657.1_1-1152
blaADC-43	blaADC	extended-spectrum	class C beta-lactamase	ADC-43	BETA-LACTAM	CEPHALOSPORIN	WP_032055358.1	NG_048658.1	NG_048658.1_1-1152
blaADC-101	blaADC	extended-spectrum	class C beta-lactamase	ADC-101	BETA-LACTAM	CEPHALOSPORIN	WP_068981608.1	NG_051440.1	NG_051440.1_1-1152
blaADC-102	blaADC	extended-spectrum	class C beta-lactamase	ADC-102	BETA-LACTAM	CEPHALOSPORIN	WP_068981609.1	NG_051441.1	NG_051441.1_1-1152
blaADC-103	blaADC	extended-spectrum	class C beta-lactamase	ADC-103	BETA-LACTAM	CEPHALOSPORIN	WP_068981610.1	NG_051442.1	NG_051442.1_1-1152
blaADC-104	blaADC	extended-spectrum	class C beta-lactamase	ADC-104	BETA-LACTAM	CEPHALOSPORIN	WP_068981611.1	NG_051443.1	NG_051443.1_1-1152
blaADC-105	blaADC	extended-spectrum	class C beta-lactamase	ADC-105	BETA-LACTAM	CEPHALOSPORIN	WP_068981612.1	NG_051444.1	NG_051444.1_1-1152
blaADC-106	blaADC	extended-spectrum	class C beta-lactamase	ADC-106	BETA-LACTAM	CEPHALOSPORIN	WP_068981613.1	NG_051445.1	NG_051445.1_1-1152
blaADC-107	blaADC	extended-spectrum	class C beta-lactamase	ADC-107	BETA-LACTAM	CEPHALOSPORIN	WP_068981614.1	NG_051446.1	NG_051446.1_1-1152
blaADC-10	blaADC	extended-spectrum	class C beta-lactamase	ADC-10	BETA-LACTAM	CEPHALOSPORIN	WP_063857786.1	NG_048634.1	NG_048634.1_1-1167
blaADC-116	blaADC	extended-spectrum	class C beta-lactamase	ADC-116	BETA-LACTAM	CEPHALOSPORIN	WP_017816757.1	NG_064675.1	NG_064675.1_101-1252
blaADC-117	blaADC	extended-spectrum	class C beta-lactamase	ADC-117	BETA-LACTAM	CEPHALOSPORIN	WP_002157727.1	NG_064676.1	NG_064676.1_101-1252
blaADC-119	blaADC	extended-spectrum	class C beta-lactamase	ADC-119	BETA-LACTAM	CEPHALOSPORIN	WP_004712857.1	NG_064677.1	NG_064677.1_101-1252
blaADC-11	blaADC	extended-spectrum	class C beta-lactamase	ADC-11	BETA-LACTAM	CEPHALOSPORIN	WP_001211205.1	NG_048635.1	NG_048635.1_1-1152
blaADC-120	blaADC	extended-spectrum	class C beta-lactamase	ADC-120	BETA-LACTAM	CEPHALOSPORIN	WP_002126587.1	NG_064678.1	NG_064678.1_101-1252
blaADC-121	blaADC	extended-spectrum	class C beta-lactamase	ADC-121	BETA-LACTAM	CEPHALOSPORIN	WP_005109685.1	NG_064679.1	NG_064679.1_101-1252
blaADC-122	blaADC	extended-spectrum	class C beta-lactamase	ADC-122	BETA-LACTAM	CEPHALOSPORIN	WP_005123276.1	NG_064680.1	NG_064680.1_101-1252
blaADC-123	blaADC	extended-spectrum	class C beta-lactamase	ADC-123	BETA-LACTAM	CEPHALOSPORIN	WP_004840559.1	NG_064681.1	NG_064681.1_101-1252
blaADC-125	blaADC	extended-spectrum	class C beta-lactamase	ADC-125	BETA-LACTAM	CEPHALOSPORIN	WP_005131186.1	NG_064682.1	NG_064682.1_101-1252
blaADC-127	blaADC	extended-spectrum	class C beta-lactamase	ADC-127	BETA-LACTAM	CEPHALOSPORIN	WP_005046018.1	NG_064683.1	NG_064683.1_101-1252
blaADC-128	blaADC	extended-spectrum	class C beta-lactamase	ADC-128	BETA-LACTAM	CEPHALOSPORIN	WP_004643536.1	NG_064684.1	NG_064684.1_101-1252
blaADC-129	blaADC	extended-spectrum	class C beta-lactamase	ADC-129	BETA-LACTAM	CEPHALOSPORIN	WP_005039111.1	NG_064685.1	NG_064685.1_101-1252
blaADC-12	blaADC	extended-spectrum	class C beta-lactamase	ADC-12	BETA-LACTAM	CEPHALOSPORIN	WP_063857787.1	NG_048636.1	NG_048636.1_1-1152
blaADC-130	blaADC	extended-spectrum	class C beta-lactamase	ADC-130	BETA-LACTAM	CEPHALOSPORIN	WP_004886093.1	NG_064686.1	NG_064686.1_101-1252
blaADC-131	blaADC	extended-spectrum	class C beta-lactamase	ADC-131	BETA-LACTAM	CEPHALOSPORIN	WP_004707701.1	NG_064687.1	NG_064687.1_101-1252
blaADC-132	blaADC	extended-spectrum	class C beta-lactamase	ADC-132	BETA-LACTAM	CEPHALOSPORIN	WP_005068074.1	NG_064688.1	NG_064688.1_101-1252
blaADC-133	blaADC	extended-spectrum	class C beta-lactamase	ADC-133	BETA-LACTAM	CEPHALOSPORIN	WP_004700205.1	NG_064689.1	NG_064689.1_101-1252
blaADC-134	blaADC	extended-spectrum	class C beta-lactamase	ADC-134	BETA-LACTAM	CEPHALOSPORIN	WP_005307218.1	NG_064690.1	NG_064690.1_101-1252
blaADC-135	blaADC	extended-spectrum	class C beta-lactamase	ADC-135	BETA-LACTAM	CEPHALOSPORIN	WP_004790939.1	NG_064691.1	NG_064691.1_101-1252
blaADC-136	blaADC	extended-spectrum	class C beta-lactamase	ADC-136	BETA-LACTAM	CEPHALOSPORIN	WP_016137488.1	NG_064692.1	NG_064692.1_101-1252
blaADC-137	blaADC	extended-spectrum	class C beta-lactamase	ADC-137	BETA-LACTAM	CEPHALOSPORIN	WP_016140427.1	NG_064693.1	NG_064693.1_101-1252
blaADC-138	blaADC	extended-spectrum	class C beta-lactamase	ADC-138	BETA-LACTAM	CEPHALOSPORIN	WP_016146025.1	NG_064694.1	NG_064694.1_101-1252
blaADC-13	blaADC	extended-spectrum	class C beta-lactamase	ADC-13	BETA-LACTAM	CEPHALOSPORIN	WP_063857788.1	NG_048637.1	NG_048637.1_1-1152
blaADC-148	blaADC	extended-spectrum	class C beta-lactamase	ADC-148	BETA-LACTAM	CEPHALOSPORIN	WP_039246976.1	NG_064703.1	NG_064703.1_101-1252
blaADC-149	blaADC	extended-spectrum	class C beta-lactamase	ADC-149	BETA-LACTAM	CEPHALOSPORIN	WP_014207272.1	NG_064704.1	NG_064704.1_101-1252
blaADC-14	blaADC	extended-spectrum	class C beta-lactamase	ADC-14	BETA-LACTAM	CEPHALOSPORIN	WP_063857789.1	NG_048638.1	NG_048638.1_1-1152
blaADC-150	blaADC	extended-spectrum	class C beta-lactamase	ADC-150	BETA-LACTAM	CEPHALOSPORIN	WP_017386568.1	NG_064705.1	NG_064705.1_1-1152
blaADC-151	blaADC	extended-spectrum	class C beta-lactamase	ADC-151	BETA-LACTAM	CEPHALOSPORIN	WP_063099318.1	NG_064706.1	NG_064706.1_101-1252
blaADC-164	blaADC	extended-spectrum	class C beta-lactamase	ADC-164	BETA-LACTAM	CEPHALOSPORIN	WP_032068214.1	NG_056106.1	NG_056106.1_1-1152
blaADC-165	blaADC	extended-spectrum	class C beta-lactamase	ADC-165	BETA-LACTAM	CEPHALOSPORIN	WP_001211239.1	NG_056107.1	NG_056107.1_1-1152
blaADC-166	blaADC	extended-spectrum	class C beta-lactamase	ADC-166	BETA-LACTAM	CEPHALOSPORIN	WP_101244937.1	NG_056108.1	NG_056108.1_1-1152
blaADC-167	blaADC	extended-spectrum	class C beta-lactamase	ADC-167	BETA-LACTAM	CEPHALOSPORIN	WP_002046804.1	NG_056109.1	NG_056109.1_1-1152
blaADC-168	blaADC	extended-spectrum	class C beta-lactamase	ADC-168	BETA-LACTAM	CEPHALOSPORIN	WP_101244938.1	NG_056110.1	NG_056110.1_1-1152
blaADC-169	blaADC	extended-spectrum	class C beta-lactamase	ADC-169	BETA-LACTAM	CEPHALOSPORIN	WP_001211212.1	NG_056172.1	NG_056172.1_1-1152
blaADC-16	blaADC	extended-spectrum	class C beta-lactamase	ADC-16	BETA-LACTAM	CEPHALOSPORIN	WP_063857791.1	NG_048640.1	NG_048640.1_1-1152
blaADC-170	blaADC	extended-spectrum	class C beta-lactamase	ADC-170	BETA-LACTAM	CEPHALOSPORIN	WP_102607458.1	NG_056175.1	NG_056175.1_1-1152
blaADC-174	blaADC	extended-spectrum	class C beta-lactamase	ADC-174	BETA-LACTAM	CEPHALOSPORIN	WP_114699268.1	NG_061390.1	NG_061390.1_1-1152
blaADC-175	blaADC	extended-spectrum	class C beta-lactamase	ADC-175	BETA-LACTAM	CEPHALOSPORIN	WP_001211208.1	NG_061391.1	NG_061391.1_1-1152
blaADC-176	blaADC	extended-spectrum	class C beta-lactamase	ADC-176	BETA-LACTAM	CEPHALOSPORIN	WP_001159761.1	NG_061392.1	NG_061392.1_1-1167
blaADC-179	blaADC	extended-spectrum	class C beta-lactamase	ADC-179	BETA-LACTAM	CEPHALOSPORIN	WP_114699271.1	NG_061395.1	NG_061395.1_1-1152
blaADC-17	blaADC	extended-spectrum	class C beta-lactamase	ADC-17	BETA-LACTAM	CEPHALOSPORIN	WP_063857792.1	NG_048641.1	NG_048641.1_1-1152
blaADC-180	blaADC	extended-spectrum	class C beta-lactamase	ADC-180	BETA-LACTAM	CEPHALOSPORIN	WP_114699272.1	NG_061396.1	NG_061396.1_1-1152
blaADC-181	blaADC	extended-spectrum	class C beta-lactamase	ADC-181	BETA-LACTAM	CEPHALOSPORIN	WP_046693238.1	NG_063832.1	NG_063832.1_1-1152
blaADC-182	blaADC	extended-spectrum	class C beta-lactamase	ADC-182	BETA-LACTAM	CEPHALOSPORIN	WP_057691114.1	NG_063833.1	NG_063833.1_1-1161
blaADC-183	blaADC	extended-spectrum	class C beta-lactamase	ADC-183	BETA-LACTAM	CEPHALOSPORIN	WP_128268232.1	NG_063834.1	NG_063834.1_1-1152
blaADC-184	blaADC	extended-spectrum	class C beta-lactamase	ADC-184	BETA-LACTAM	CEPHALOSPORIN	WP_059247009.1	NG_064707.1	NG_064707.1_1-1152
blaADC-185	blaADC	extended-spectrum	class C beta-lactamase	ADC-185	BETA-LACTAM	CEPHALOSPORIN	WP_001211210.1	NG_064708.1	NG_064708.1_1-1152
blaADC-186	blaADC	extended-spectrum	class C beta-lactamase	ADC-186	BETA-LACTAM	CEPHALOSPORIN	WP_072292271.1	NG_064709.1	NG_064709.1_1-1152
blaADC-187	blaADC	extended-spectrum	class C beta-lactamase	ADC-187	BETA-LACTAM	CEPHALOSPORIN	WP_136512056.1	NG_064710.1	NG_064710.1_1-1152
blaADC-189	blaADC	extended-spectrum	class C beta-lactamase	ADC-189	BETA-LACTAM	CEPHALOSPORIN	WP_136512058.1	NG_064712.1	NG_064712.1_1-1152
blaADC-18	blaADC	extended-spectrum	class C beta-lactamase	ADC-18	BETA-LACTAM	CEPHALOSPORIN	WP_002118772.1	NG_048642.1	NG_048642.1_1-1152
blaADC-190	blaADC	extended-spectrum	class C beta-lactamase	ADC-190	BETA-LACTAM	CEPHALOSPORIN	WP_136512059.1	NG_064713.1	NG_064713.1_1-1152
blaADC-191	blaADC	extended-spectrum	class C beta-lactamase	ADC-191	BETA-LACTAM	CEPHALOSPORIN	WP_003112187.1	NG_064714.1	NG_064714.1_1-1152
blaADC-192	blaADC	extended-spectrum	class C beta-lactamase	ADC-192	BETA-LACTAM	CEPHALOSPORIN	WP_136512060.1	NG_064715.1	NG_064715.1_1-1152
blaADC-193	blaADC	extended-spectrum	class C beta-lactamase	ADC-193	BETA-LACTAM	CEPHALOSPORIN	WP_013197184.1	NG_064716.1	NG_064716.1_101-1252
blaADC-194	blaADC	extended-spectrum	class C beta-lactamase	ADC-194	BETA-LACTAM	CEPHALOSPORIN	WP_133972424.1	NG_066693.1	NG_066693.1_1-1152
blaADC-195	blaADC	extended-spectrum	class C beta-lactamase	ADC-195	BETA-LACTAM	CEPHALOSPORIN	WP_140423305.1	NG_065420.1	NG_065420.1_1-1152
blaADC-196	blaADC	extended-spectrum	class C beta-lactamase	ADC-196	BETA-LACTAM	CEPHALOSPORIN	WP_145850033.1	NG_065858.1	NG_065858.1_1-1152
blaADC-199	blaADC	extended-spectrum	class C beta-lactamase	ADC-199	BETA-LACTAM	CEPHALOSPORIN	WP_114166683.1	NG_066479.1	NG_066479.1_1-1167
blaADC-19	blaADC	extended-spectrum	class C beta-lactamase	ADC-19	BETA-LACTAM	CEPHALOSPORIN	WP_063857793.1	NG_048643.1	NG_048643.1_1-1152
blaADC-201	blaADC	extended-spectrum	class C beta-lactamase	ADC-201	BETA-LACTAM	CEPHALOSPORIN	WP_150823455.1	NG_066481.1	NG_066481.1_1-1152
blaADC-202	blaADC	extended-spectrum	class C beta-lactamase	ADC-202	BETA-LACTAM	CEPHALOSPORIN	WP_150823456.1	NG_066482.1	NG_066482.1_1-1152
blaADC-203	blaADC	extended-spectrum	class C beta-lactamase	ADC-203	BETA-LACTAM	CEPHALOSPORIN	WP_032000414.1	NG_066483.1	NG_066483.1_1-1152
blaADC-204	blaADC	extended-spectrum	class C beta-lactamase	ADC-204	BETA-LACTAM	CEPHALOSPORIN	WP_150823457.1	NG_066484.1	NG_066484.1_1-1152
blaADC-205	blaADC	extended-spectrum	class C beta-lactamase	ADC-205	BETA-LACTAM	CEPHALOSPORIN	WP_150823458.1	NG_066485.1	NG_066485.1_1-1152
blaADC-206	blaADC	extended-spectrum	class C beta-lactamase	ADC-206	BETA-LACTAM	CEPHALOSPORIN	WP_150823459.1	NG_066486.1	NG_066486.1_1-1152
blaADC-207	blaADC	extended-spectrum	class C beta-lactamase	ADC-207	BETA-LACTAM	CEPHALOSPORIN	WP_130173437.1	NG_066487.1	NG_066487.1_1-1152
blaADC-208	blaADC	extended-spectrum	class C beta-lactamase	ADC-208	BETA-LACTAM	CEPHALOSPORIN	WP_150823460.1	NG_066488.1	NG_066488.1_1-1152
blaADC-209	blaADC	extended-spectrum	class C beta-lactamase	ADC-209	BETA-LACTAM	CEPHALOSPORIN	WP_150823461.1	NG_066489.1	NG_066489.1_1-1152
blaADC-20	blaADC	extended-spectrum	class C beta-lactamase	ADC-20	BETA-LACTAM	CEPHALOSPORIN	WP_063857794.1	NG_048645.1	NG_048645.1_1-1152
blaADC-210	blaADC	extended-spectrum	class C beta-lactamase	ADC-210	BETA-LACTAM	CEPHALOSPORIN	WP_150823462.1	NG_066490.1	NG_066490.1_1-1152
blaADC-211	blaADC	extended-spectrum	class C beta-lactamase	ADC-211	BETA-LACTAM	CEPHALOSPORIN	WP_150823463.1	NG_066491.1	NG_066491.1_1-1152
blaADC-214	blaADC	extended-spectrum	class C beta-lactamase	ADC-214	BETA-LACTAM	CEPHALOSPORIN	WP_060454527.1	NG_066494.1	NG_066494.1_87-1238
blaADC-215	blaADC	extended-spectrum	class C beta-lactamase	ADC-215	BETA-LACTAM	CEPHALOSPORIN	WP_039098799.1	NG_066495.1	NG_066495.1_87-1238
blaADC-216	blaADC	extended-spectrum	class C beta-lactamase	ADC-216	BETA-LACTAM	CEPHALOSPORIN	WP_039211240.1	NG_066496.1	NG_066496.1_101-1252
blaADC-218	blaADC	extended-spectrum	class C beta-lactamase	ADC-218	BETA-LACTAM	CEPHALOSPORIN	WP_078216190.1	NG_066498.1	NG_066498.1_100-1254
blaADC-21	blaADC	extended-spectrum	class C beta-lactamase	ADC-21	BETA-LACTAM	CEPHALOSPORIN	WP_063857795.1	NG_048646.1	NG_048646.1_1-1152
blaADC-221	blaADC	extended-spectrum	class C beta-lactamase	ADC-221	BETA-LACTAM	CEPHALOSPORIN	WP_156404644.1	NG_067133.1	NG_067133.1_1-1152
blaADC-222	blaADC	extended-spectrum	class C beta-lactamase	ADC-222	BETA-LACTAM	CEPHALOSPORIN	WP_031960999.1	NG_067193.1	NG_067193.1_1-1152
blaADC-227	blaADC	extended-spectrum	class C beta-lactamase	ADC-227	BETA-LACTAM	CEPHALOSPORIN	WP_160164834.1	NG_067198.1	NG_067198.1_1-1155
blaADC-22	blaADC	extended-spectrum	class C beta-lactamase	ADC-22	BETA-LACTAM	CEPHALOSPORIN	WP_063857796.1	NG_048647.1	NG_048647.1_1-1152
blaADC-230	blaADC	extended-spectrum	class C beta-lactamase	ADC-230	BETA-LACTAM	CEPHALOSPORIN	WP_160164837.1	NG_067201.1	NG_067201.1_1-1152
blaADC-234	blaADC	extended-spectrum	class C beta-lactamase	ADC-234	BETA-LACTAM	CEPHALOSPORIN	WP_159162532.1	NG_067978.1	NG_067978.1_11-1159
blaADC-235	blaADC	extended-spectrum	class C beta-lactamase	ADC-235	BETA-LACTAM	CEPHALOSPORIN	WP_132038428.1	NG_067979.1	NG_067979.1_11-1174
blaADC-236	blaADC	extended-spectrum	class C beta-lactamase	ADC-236	BETA-LACTAM	CEPHALOSPORIN	WP_176673601.1	NG_070226.1	NG_070226.1_101-1252
blaADC-237	blaADC	extended-spectrum	class C beta-lactamase	ADC-237	BETA-LACTAM	CEPHALOSPORIN	WP_086262823.1	NG_071183.1	NG_071183.1_101-1252
blaADC-238	blaADC	extended-spectrum	class C beta-lactamase	ADC-238	BETA-LACTAM	CEPHALOSPORIN	WP_002058891.1	NG_071184.1	NG_071184.1_101-1252
blaADC-239	blaADC	extended-spectrum	class C beta-lactamase	ADC-239	BETA-LACTAM	CEPHALOSPORIN	WP_031981814.1	NG_071185.1	NG_071185.1_101-1252
blaADC-23	blaADC	extended-spectrum	class C beta-lactamase	ADC-23	BETA-LACTAM	CEPHALOSPORIN	WP_063857797.1	NG_048648.1	NG_048648.1_1-1152
blaADC-240	blaADC	extended-spectrum	class C beta-lactamase	ADC-240	BETA-LACTAM	CEPHALOSPORIN	WP_001211207.1	NG_071186.1	NG_071186.1_87-1238
blaADC-241	blaADC	extended-spectrum	class C beta-lactamase	ADC-241	BETA-LACTAM	CEPHALOSPORIN	WP_001211198.1	NG_071187.1	NG_071187.1_101-1252
blaADC-242	blaADC	extended-spectrum	class C beta-lactamase	ADC-242	BETA-LACTAM	CEPHALOSPORIN	WP_047481394.1	NG_071188.1	NG_071188.1_101-1252
blaADC-243	blaADC	extended-spectrum	class C beta-lactamase	ADC-243	BETA-LACTAM	CEPHALOSPORIN	WP_001211199.1	NG_071189.1	NG_071189.1_101-1252
blaADC-244	blaADC	extended-spectrum	class C beta-lactamase	ADC-244	BETA-LACTAM	CEPHALOSPORIN	WP_032017586.1	NG_071190.1	NG_071190.1_101-1252
blaADC-245	blaADC	extended-spectrum	class C beta-lactamase	ADC-245	BETA-LACTAM	CEPHALOSPORIN	WP_032005249.1	NG_071191.1	NG_071191.1_101-1252
blaADC-246	blaADC	extended-spectrum	class C beta-lactamase	ADC-246	BETA-LACTAM	CEPHALOSPORIN	WP_031976577.1	NG_071192.1	NG_071192.1_101-1252
blaADC-247	blaADC	extended-spectrum	class C beta-lactamase	ADC-247	BETA-LACTAM	CEPHALOSPORIN	WP_032058755.1	NG_071193.1	NG_071193.1_101-1252
blaADC-248	blaADC	extended-spectrum	class C beta-lactamase	ADC-248	BETA-LACTAM	CEPHALOSPORIN	WP_021511005.1	NG_071194.1	NG_071194.1_101-1252
blaADC-249	blaADC	extended-spectrum	class C beta-lactamase	ADC-249	BETA-LACTAM	CEPHALOSPORIN	WP_001211200.1	NG_071195.1	NG_071195.1_101-1252
blaADC-24	blaADC	extended-spectrum	class C beta-lactamase	ADC-24	BETA-LACTAM	CEPHALOSPORIN	WP_136512061.1	NG_064717.1	NG_064717.1_1-1152
blaADC-251	blaADC	extended-spectrum	class C beta-lactamase	ADC-251	BETA-LACTAM	CEPHALOSPORIN	WP_086443396.1	NG_071197.1	NG_071197.1_101-1252
blaADC-252	blaADC	extended-spectrum	class C beta-lactamase	ADC-252	BETA-LACTAM	CEPHALOSPORIN	WP_086399847.1	NG_071198.1	NG_071198.1_101-1252
blaADC-253	blaADC	extended-spectrum	class C beta-lactamase	ADC-253	BETA-LACTAM	CEPHALOSPORIN	WP_086394244.1	NG_071199.1	NG_071199.1_101-1252
blaADC-254	blaADC	extended-spectrum	class C beta-lactamase	ADC-254	BETA-LACTAM	CEPHALOSPORIN	WP_031996777.1	NG_071200.1	NG_071200.1_101-1252
blaADC-255	blaADC	extended-spectrum	class C beta-lactamase	ADC-255	BETA-LACTAM	CEPHALOSPORIN	WP_022575343.1	NG_071201.1	NG_071201.1_101-1252
blaADC-256	blaADC	extended-spectrum	class C beta-lactamase	ADC-256	BETA-LACTAM	CEPHALOSPORIN	WP_204376223.1	NG_073457.1	NG_073457.1_1-1152
blaADC-257	blaADC	extended-spectrum	class C beta-lactamase	ADC-257	BETA-LACTAM	CEPHALOSPORIN	WP_116020564.1	NG_079217.1	NG_079217.1_1-1152
blaADC-258	blaADC	extended-spectrum	class C beta-lactamase	ADC-258	BETA-LACTAM	CEPHALOSPORIN	WP_114259520.1	NG_079218.1	NG_079218.1_1-1167
blaADC-259	blaADC	extended-spectrum	class C beta-lactamase	ADC-259	BETA-LACTAM	CEPHALOSPORIN	WP_046882921.1	NG_078048.1	NG_078048.1_1-1152
blaADC-262	blaADC	extended-spectrum	class C beta-lactamase	ADC-262	BETA-LACTAM	CEPHALOSPORIN	WP_213702342.1	NG_079220.1	NG_079220.1_1-1152
blaADC-263	blaADC	extended-spectrum	class C beta-lactamase	ADC-263	BETA-LACTAM	CEPHALOSPORIN	WP_109433738.1	NG_079221.1	NG_079221.1_1-1152
blaADC-264	blaADC	extended-spectrum	class C beta-lactamase	ADC-264	BETA-LACTAM	CEPHALOSPORIN	WP_240067716.1	NG_079222.1	NG_079222.1_1-1152
blaADC-265	blaADC	extended-spectrum	class C beta-lactamase	ADC-265	BETA-LACTAM	CEPHALOSPORIN	WP_086265799.1	NG_079885.1	NG_079885.1_1-1152
blaADC-266	blaADC	extended-spectrum	class C beta-lactamase	ADC-266	BETA-LACTAM	CEPHALOSPORIN	WP_249828059.1	NG_080770.1	NG_080770.1_1-1152
blaADC-267	blaADC	extended-spectrum	class C beta-lactamase	ADC-267	BETA-LACTAM	CEPHALOSPORIN	WP_256875591.1	NG_081677.1	NG_081677.1_1-1152
blaADC-269	blaADC	extended-spectrum	class C beta-lactamase	ADC-269	BETA-LACTAM	CEPHALOSPORIN	WP_032025626.1	NG_081679.1	NG_081679.1_1-1152
blaADC-26	blaADC	extended-spectrum	class C beta-lactamase	ADC-26	BETA-LACTAM	CEPHALOSPORIN	WP_001211238.1	NG_048650.1	NG_048650.1_1-1152
blaADC-270	blaADC	extended-spectrum	class C beta-lactamase	ADC-270	BETA-LACTAM	CEPHALOSPORIN	WP_199947622.1	NG_081680.1	NG_081680.1_1-1152
blaADC-271	blaADC	extended-spectrum	class C beta-lactamase	ADC-271	BETA-LACTAM	CEPHALOSPORIN	WP_247791718.1	NG_081681.1	NG_081681.1_1-1152
blaADC-272	blaADC	extended-spectrum	class C beta-lactamase	ADC-272	BETA-LACTAM	CEPHALOSPORIN	WP_256875592.1	NG_081682.1	NG_081682.1_1-1152
blaADC-273	blaADC	extended-spectrum	class C beta-lactamase	ADC-273	BETA-LACTAM	CEPHALOSPORIN	WP_256875593.1	NG_081683.1	NG_081683.1_1-1152
blaADC-274	blaADC	extended-spectrum	class C beta-lactamase	ADC-274	BETA-LACTAM	CEPHALOSPORIN	WP_256875594.1	NG_081684.1	NG_081684.1_1-1152
blaADC-275	blaADC	extended-spectrum	class C beta-lactamase	ADC-275	BETA-LACTAM	CEPHALOSPORIN	WP_256875595.1	NG_081685.1	NG_081685.1_1-1152
blaADC-276	blaADC	extended-spectrum	class C beta-lactamase	ADC-276	BETA-LACTAM	CEPHALOSPORIN	WP_256875596.1	NG_081686.1	NG_081686.1_1-1152
blaADC-277	blaADC	extended-spectrum	class C beta-lactamase	ADC-277	BETA-LACTAM	CEPHALOSPORIN	WP_256875597.1	NG_081687.1	NG_081687.1_1-1170
blaADC-278	blaADC	extended-spectrum	class C beta-lactamase	ADC-278	BETA-LACTAM	CEPHALOSPORIN	WP_118978092.1	NG_081688.1	NG_081688.1_1-1152
blaADC-279	blaADC	extended-spectrum	class C beta-lactamase	ADC-279	BETA-LACTAM	CEPHALOSPORIN	WP_038343177.1	NG_081689.1	NG_081689.1_1-1152
blaADC-280	blaADC	extended-spectrum	class C beta-lactamase	ADC-280	BETA-LACTAM	CEPHALOSPORIN	WP_078202643.1	NG_081690.1	NG_081690.1_1-1152
blaADC-281	blaADC	extended-spectrum	class C beta-lactamase	ADC-281	BETA-LACTAM	CEPHALOSPORIN	WP_256875598.1	NG_081691.1	NG_081691.1_1-1152
blaADC-282	blaADC	extended-spectrum	class C beta-lactamase	ADC-282	BETA-LACTAM	CEPHALOSPORIN	WP_256875599.1	NG_081692.1	NG_081692.1_1-1152
blaADC-283	blaADC	extended-spectrum	class C beta-lactamase	ADC-283	BETA-LACTAM	CEPHALOSPORIN	WP_257394578.1	NG_081788.1	NG_081788.1_1-1152
blaADC-284	blaADC	extended-spectrum	class C beta-lactamase	ADC-284	BETA-LACTAM	CEPHALOSPORIN	WP_115434994.1	NG_088383.1	NG_088383.1_1-1152
blaADC-285	blaADC	extended-spectrum	class C beta-lactamase	ADC-285	BETA-LACTAM	CEPHALOSPORIN	WP_262697121.1	NG_088384.1	NG_088384.1_1-1152
blaADC-286	blaADC	extended-spectrum	class C beta-lactamase	ADC-286	BETA-LACTAM	CEPHALOSPORIN	WP_268871845.1	NG_148609.1	NG_148609.1_1-1152
blaADC-287	blaADC	extended-spectrum	class C beta-lactamase	ADC-287	BETA-LACTAM	CEPHALOSPORIN	WP_068613499.1	NG_148610.1	NG_148610.1_1-1152
blaADC-288	blaADC	extended-spectrum	class C beta-lactamase	ADC-288	BETA-LACTAM	CEPHALOSPORIN	WP_104074874.1	NG_148611.1	NG_148611.1_1-1152
blaADC-289	blaADC	extended-spectrum	class C beta-lactamase	ADC-289	BETA-LACTAM	CEPHALOSPORIN	WP_114270086.1	NG_148612.1	NG_148612.1_1-1152
blaADC-290	blaADC	extended-spectrum	class C beta-lactamase	ADC-290	BETA-LACTAM	CEPHALOSPORIN	WP_268871846.1	NG_148613.1	NG_148613.1_1-1152
blaADC-291	blaADC	extended-spectrum	class C beta-lactamase	ADC-291	BETA-LACTAM	CEPHALOSPORIN	WP_001211201.1	NG_149679.1	NG_149679.1_1-1152
blaADC-292	blaADC	extended-spectrum	class C beta-lactamase	ADC-292	BETA-LACTAM	CEPHALOSPORIN	WP_274858813.1	NG_156960.1	NG_156960.1_101-1252
blaADC-295	blaADC	extended-spectrum	class C beta-lactamase	ADC-295	BETA-LACTAM	CEPHALOSPORIN	WP_009389984.1	NG_156963.1	NG_156963.1_101-1252
blaADC-29	blaADC	extended-spectrum	class C beta-lactamase	ADC-29	BETA-LACTAM	CEPHALOSPORIN	WP_069174569.1	NG_051493.1	NG_051493.1_101-1252
blaADC-2	blaADC	extended-spectrum	class C beta-lactamase	ADC-2	BETA-LACTAM	CEPHALOSPORIN	WP_004746565.1	NG_048644.1	NG_048644.1_101-1252
blaADC-302	blaADC	extended-spectrum	class C beta-lactamase	ADC-302	BETA-LACTAM	CEPHALOSPORIN	WP_001211202.1	NG_156964.1	NG_156964.1_101-1252
blaADC-303	blaADC	extended-spectrum	class C beta-lactamase	ADC-303	BETA-LACTAM	CEPHALOSPORIN	WP_001211225.1	NG_156965.1	NG_156965.1_101-1252
blaADC-304	blaADC	extended-spectrum	class C beta-lactamase	ADC-304	BETA-LACTAM	CEPHALOSPORIN	WP_272307067.1	NG_156966.1	NG_156966.1_101-1252
blaADC-305	blaADC	extended-spectrum	class C beta-lactamase	ADC-305	BETA-LACTAM	CEPHALOSPORIN	WP_272267218.1	NG_156967.1	NG_156967.1_101-1252
blaADC-306	blaADC	extended-spectrum	class C beta-lactamase	ADC-306	BETA-LACTAM	CEPHALOSPORIN	WP_272372047.1	NG_156968.1	NG_156968.1_101-1252
blaADC-307	blaADC	extended-spectrum	class C beta-lactamase	ADC-307	BETA-LACTAM	CEPHALOSPORIN	WP_272247217.1	NG_156969.1	NG_156969.1_101-1252
blaADC-308	blaADC	extended-spectrum	class C beta-lactamase	ADC-308	BETA-LACTAM	CEPHALOSPORIN	WP_065712098.1	NG_156970.1	NG_156970.1_101-1252
blaADC-309	blaADC	extended-spectrum	class C beta-lactamase	ADC-309	BETA-LACTAM	CEPHALOSPORIN	WP_272326044.1	NG_156971.1	NG_156971.1_101-1252
blaADC-310	blaADC	extended-spectrum	class C beta-lactamase	ADC-310	BETA-LACTAM	CEPHALOSPORIN	WP_032029974.1	NG_156972.1	NG_156972.1_101-1252
blaADC-311	blaADC	extended-spectrum	class C beta-lactamase	ADC-311	BETA-LACTAM	CEPHALOSPORIN	WP_174749605.1	NG_156973.1	NG_156973.1_101-1252
blaADC-312	blaADC	extended-spectrum	class C beta-lactamase	ADC-312	BETA-LACTAM	CEPHALOSPORIN	WP_261470340.1	NG_156974.1	NG_156974.1_101-1252
blaADC-313	blaADC	extended-spectrum	class C beta-lactamase	ADC-313	BETA-LACTAM	CEPHALOSPORIN	WP_272333251.1	NG_156975.1	NG_156975.1_101-1252
blaADC-314	blaADC	extended-spectrum	class C beta-lactamase	ADC-314	BETA-LACTAM	CEPHALOSPORIN	WP_272290549.1	NG_156976.1	NG_156976.1_101-1252
blaADC-315	blaADC	extended-spectrum	class C beta-lactamase	ADC-315	BETA-LACTAM	CEPHALOSPORIN	WP_031380135.1	NG_156977.1	NG_156977.1_101-1252
blaADC-316	blaADC	extended-spectrum	class C beta-lactamase	ADC-316	BETA-LACTAM	CEPHALOSPORIN	WP_272273772.1	NG_156978.1	NG_156978.1_101-1252
blaADC-317	blaADC	extended-spectrum	class C beta-lactamase	ADC-317	BETA-LACTAM	CEPHALOSPORIN	WP_272389475.1	NG_156979.1	NG_156979.1_101-1252
blaADC-318	blaADC	extended-spectrum	class C beta-lactamase	ADC-318	BETA-LACTAM	CEPHALOSPORIN	WP_272311194.1	NG_156980.1	NG_156980.1_101-1252
blaADC-319	blaADC	extended-spectrum	class C beta-lactamase	ADC-319	BETA-LACTAM	CEPHALOSPORIN	WP_272284684.1	NG_156981.1	NG_156981.1_101-1252
blaADC-320	blaADC	extended-spectrum	class C beta-lactamase	ADC-320	BETA-LACTAM	CEPHALOSPORIN	WP_272236549.1	NG_156982.1	NG_156982.1_101-1252
blaADC-321	blaADC	extended-spectrum	class C beta-lactamase	ADC-321	BETA-LACTAM	CEPHALOSPORIN	WP_262093836.1	NG_156983.1	NG_156983.1_101-1252
blaADC-322	blaADC	extended-spectrum	class C beta-lactamase	ADC-322	BETA-LACTAM	CEPHALOSPORIN	WP_272291658.1	NG_156984.1	NG_156984.1_101-1252
blaADC-323	blaADC	extended-spectrum	class C beta-lactamase	ADC-323	BETA-LACTAM	CEPHALOSPORIN	WP_272359117.1	NG_156985.1	NG_156985.1_101-1252
blaADC-324	blaADC	extended-spectrum	class C beta-lactamase	ADC-324	BETA-LACTAM	CEPHALOSPORIN	WP_272276659.1	NG_156986.1	NG_156986.1_101-1252
blaADC-325	blaADC	extended-spectrum	class C beta-lactamase	ADC-325	BETA-LACTAM	CEPHALOSPORIN	WP_261479309.1	NG_156987.1	NG_156987.1_101-1252
blaADC-326	blaADC	extended-spectrum	class C beta-lactamase	ADC-326	BETA-LACTAM	CEPHALOSPORIN	WP_272315880.1	NG_156988.1	NG_156988.1_101-1252
blaADC-327	blaADC	extended-spectrum	class C beta-lactamase	ADC-327	BETA-LACTAM	CEPHALOSPORIN	WP_272291558.1	NG_156989.1	NG_156989.1_101-1252
blaADC-328	blaADC	extended-spectrum	class C beta-lactamase	ADC-328	BETA-LACTAM	CEPHALOSPORIN	WP_069370341.1	NG_156990.1	NG_156990.1_101-1252
blaADC-329	blaADC	extended-spectrum	class C beta-lactamase	ADC-329	BETA-LACTAM	CEPHALOSPORIN	WP_272312953.1	NG_156991.1	NG_156991.1_101-1252
blaADC-32	blaADC	extended-spectrum	class C beta-lactamase	ADC-32	BETA-LACTAM	CEPHALOSPORIN	WP_004739487.1	NG_050717.1	NG_050717.1_101-1252
blaADC-330	blaADC	extended-spectrum	class C beta-lactamase	ADC-330	BETA-LACTAM	CEPHALOSPORIN	WP_272357959.1	NG_156992.1	NG_156992.1_101-1252
blaADC-331	blaADC	extended-spectrum	class C beta-lactamase	ADC-331	BETA-LACTAM	CEPHALOSPORIN	WP_272305010.1	NG_156993.1	NG_156993.1_101-1252
blaADC-332	blaADC	extended-spectrum	class C beta-lactamase	ADC-332	BETA-LACTAM	CEPHALOSPORIN	WP_272289597.1	NG_156994.1	NG_156994.1_101-1252
blaADC-333	blaADC	extended-spectrum	class C beta-lactamase	ADC-333	BETA-LACTAM	CEPHALOSPORIN	WP_272321894.1	NG_156995.1	NG_156995.1_101-1252
blaADC-334	blaADC	extended-spectrum	class C beta-lactamase	ADC-334	BETA-LACTAM	CEPHALOSPORIN	WP_002052571.1	NG_203377.1	NG_203377.1_1-1152
blaADC-335	blaADC	extended-spectrum	class C beta-lactamase	ADC-335	BETA-LACTAM	CEPHALOSPORIN	WP_290468345.1	NG_203378.1	NG_203378.1_1-1152
blaADC-336	blaADC	extended-spectrum	class C beta-lactamase	ADC-336	BETA-LACTAM	CEPHALOSPORIN	WP_057690145.1	NG_228665.1	NG_228665.1_1-1152
blaADC-338	blaADC	extended-spectrum	class C beta-lactamase	ADC-338	BETA-LACTAM	CEPHALOSPORIN	WP_279984225.1	NG_231535.1	NG_231535.1_1-1152
blaADC-44	blaADC	extended-spectrum	class C beta-lactamase	ADC-44	BETA-LACTAM	CEPHALOSPORIN	WP_063857804.1	NG_048659.1	NG_048659.1_1-1152
blaADC-4	blaADC	extended-spectrum	class C beta-lactamase	ADC-4	BETA-LACTAM	CEPHALOSPORIN	WP_063857801.1	NG_048655.1	NG_048655.1_1-1152
blaADC-50	blaADC	extended-spectrum	class C beta-lactamase	ADC-50	BETA-LACTAM	CEPHALOSPORIN	WP_031965243.1	NG_048661.1	NG_048661.1_1-1152
blaADC-51	blaADC	extended-spectrum	class C beta-lactamase	ADC-51	BETA-LACTAM	CEPHALOSPORIN	WP_063857805.1	NG_048662.1	NG_048662.1_1-1152
blaADC-52	blaADC	extended-spectrum	class C beta-lactamase	ADC-52	BETA-LACTAM	CEPHALOSPORIN	WP_001211232.1	NG_048663.1	NG_048663.1_1-1152
blaADC-53	blaADC	extended-spectrum	class C beta-lactamase	ADC-53	BETA-LACTAM	CEPHALOSPORIN	WP_063857806.1	NG_048664.1	NG_048664.1_1-1152
blaADC-54	blaADC	extended-spectrum	class C beta-lactamase	ADC-54	BETA-LACTAM	CEPHALOSPORIN	WP_063857807.1	NG_048665.1	NG_048665.1_1-1152
blaADC-57	blaADC	extended-spectrum	class C beta-lactamase	ADC-57	BETA-LACTAM	CEPHALOSPORIN	WP_001211226.1	NG_051494.1	NG_051494.1_1-1152
blaADC-58	blaADC	extended-spectrum	class C beta-lactamase	ADC-58	BETA-LACTAM	CEPHALOSPORIN	WP_063857808.1	NG_048667.1	NG_048667.1_1-1152
blaADC-5	blaADC	extended-spectrum	class C beta-lactamase	ADC-5	BETA-LACTAM	CEPHALOSPORIN	WP_038405930.1	NG_048660.1	NG_048660.1_1-1152
blaADC-63	blaADC	extended-spectrum	class C beta-lactamase	ADC-63	BETA-LACTAM	CEPHALOSPORIN	WP_063857812.1	NG_048673.1	NG_048673.1_1-1152
blaADC-66	blaADC	extended-spectrum	class C beta-lactamase	ADC-66	BETA-LACTAM	CEPHALOSPORIN	WP_136512063.1	NG_064719.1	NG_064719.1_1-1152
blaADC-68	blaADC	carbapenem-hydrolyzing	class C beta-lactamase	ADC-68	BETA-LACTAM	CARBAPENEM	WP_063857815.1	NG_048676.1	NG_048676.1_1-1152
blaADC-6	blaADC	extended-spectrum	class C beta-lactamase	ADC-6	BETA-LACTAM	CEPHALOSPORIN	WP_017725267.1	NG_048669.1	NG_048669.1_101-1252
blaADC-70	blaADC	extended-spectrum	class C beta-lactamase	ADC-70	BETA-LACTAM	CEPHALOSPORIN	WP_017480710.1	NG_051317.1	NG_051317.1_101-1252
blaADC-74	blaADC	extended-spectrum	class C beta-lactamase	ADC-74	BETA-LACTAM	CEPHALOSPORIN	WP_001211203.1	NG_048679.1	NG_048679.1_1-1152
blaADC-76	blaADC	extended-spectrum	class C beta-lactamase	ADC-76	BETA-LACTAM	CEPHALOSPORIN	WP_001211237.1	NG_048681.1	NG_048681.1_1-1152
blaADC-77	blaADC	extended-spectrum	class C beta-lactamase	ADC-77	BETA-LACTAM	CEPHALOSPORIN	WP_063857818.1	NG_048682.1	NG_048682.1_54-1205
blaADC-79	blaADC	extended-spectrum	class C beta-lactamase	ADC-79	BETA-LACTAM	CEPHALOSPORIN	WP_001159760.1	NG_048684.1	NG_048684.1_1-1152
blaADC-7	blaADC	extended-spectrum	class C beta-lactamase	ADC-7	BETA-LACTAM	CEPHALOSPORIN	WP_063857816.1	NG_048677.1	NG_048677.1_1-1152
blaADC-80	blaADC	extended-spectrum	class C beta-lactamase	ADC-80	BETA-LACTAM	CEPHALOSPORIN	WP_029424536.1	NG_048686.1	NG_048686.1_1-1152
blaADC-81	blaADC	extended-spectrum	class C beta-lactamase	ADC-81	BETA-LACTAM	CEPHALOSPORIN	WP_059262723.1	NG_048687.1	NG_048687.1_1-1167
blaADC-83	blaADC	extended-spectrum	class C beta-lactamase	ADC-83	BETA-LACTAM	CEPHALOSPORIN	WP_068981615.1	NG_051447.1	NG_051447.1_1-1152
blaADC-84	blaADC	extended-spectrum	class C beta-lactamase	ADC-84	BETA-LACTAM	CEPHALOSPORIN	WP_068981616.1	NG_051448.1	NG_051448.1_1-1152
blaADC-85	blaADC	extended-spectrum	class C beta-lactamase	ADC-85	BETA-LACTAM	CEPHALOSPORIN	WP_068981617.1	NG_051449.1	NG_051449.1_1-1152
blaADC-86	blaADC	extended-spectrum	class C beta-lactamase	ADC-86	BETA-LACTAM	CEPHALOSPORIN	WP_068981618.1	NG_051450.1	NG_051450.1_1-1152
blaADC-87	blaADC	extended-spectrum	class C beta-lactamase	ADC-87	BETA-LACTAM	CEPHALOSPORIN	WP_068981619.1	NG_051451.1	NG_051451.1_1-1152
blaADC-88	blaADC	extended-spectrum	class C beta-lactamase	ADC-88	BETA-LACTAM	CEPHALOSPORIN	WP_001211221.1	NG_051452.1	NG_051452.1_1-1152
blaADC-89	blaADC	extended-spectrum	class C beta-lactamase	ADC-89	BETA-LACTAM	CEPHALOSPORIN	WP_068981620.1	NG_051453.1	NG_051453.1_1-1152
blaADC-8	blaADC	ADC-like	class C beta-lactamase	ADC-8	BETA-LACTAM	CEPHALOSPORIN	WP_004923134.1	NG_048685.1	NG_048685.1_1-1194
blaADC-90	blaADC	extended-spectrum	class C beta-lactamase	ADC-90	BETA-LACTAM	CEPHALOSPORIN	WP_068981621.1	NG_051454.1	NG_051454.1_1-1152
blaADC-91	blaADC	extended-spectrum	class C beta-lactamase	ADC-91	BETA-LACTAM	CEPHALOSPORIN	WP_068981622.1	NG_051455.1	NG_051455.1_1-1152
blaADC-92	blaADC	extended-spectrum	class C beta-lactamase	ADC-92	BETA-LACTAM	CEPHALOSPORIN	WP_068981623.1	NG_051456.1	NG_051456.1_1-1152
blaADC-93	blaADC	extended-spectrum	class C beta-lactamase	ADC-93	BETA-LACTAM	CEPHALOSPORIN	WP_068981624.1	NG_051457.1	NG_051457.1_1-1152
blaADC-94	blaADC	extended-spectrum	class C beta-lactamase	ADC-94	BETA-LACTAM	CEPHALOSPORIN	WP_068981625.1	NG_051458.1	NG_051458.1_1-1152
blaADC-95	blaADC	extended-spectrum	class C beta-lactamase	ADC-95	BETA-LACTAM	CEPHALOSPORIN	WP_068981626.1	NG_051459.1	NG_051459.1_1-1152
blaADC-96	blaADC	extended-spectrum	class C beta-lactamase	ADC-96	BETA-LACTAM	CEPHALOSPORIN	WP_068981627.1	NG_051460.1	NG_051460.1_1-1167
blaADC-97	blaADC	extended-spectrum	class C beta-lactamase	ADC-97	BETA-LACTAM	CEPHALOSPORIN	WP_068981628.1	NG_051461.1	NG_051461.1_1-1152
blaADC-98	blaADC	extended-spectrum	class C beta-lactamase	ADC-98	BETA-LACTAM	CEPHALOSPORIN	WP_068981629.1	NG_051462.1	NG_051462.1_1-1152
blaADC-99	blaADC	extended-spectrum	class C beta-lactamase	ADC-99	BETA-LACTAM	CEPHALOSPORIN	WP_068981630.1	NG_051463.1	NG_051463.1_1-1152
blaADC-152	blaADC	extended-spectrum	class C beta-lactamase	ADC-152	BETA-LACTAM	CEPHALOSPORIN	WP_001211233.1	NG_054691.1	NG_054691.1_1-1152
blaADC-154	blaADC	extended-spectrum	class C beta-lactamase	ADC-154	BETA-LACTAM	CEPHALOSPORIN	WP_005138362.1	NG_054996.1	NG_054996.1_1-1152
blaADC-155	blaADC	extended-spectrum	class C beta-lactamase	ADC-155	BETA-LACTAM	CEPHALOSPORIN	WP_005128228.1	NG_055285.1	NG_055285.1_1-1152
blaADC-156	blaADC	extended-spectrum	class C beta-lactamase	ADC-156	BETA-LACTAM	CEPHALOSPORIN	WP_024436624.1	NG_055286.1	NG_055286.1_1-1152
blaADC-157	blaADC	extended-spectrum	class C beta-lactamase	ADC-157	BETA-LACTAM	CEPHALOSPORIN	WP_088245227.1	NG_055287.1	NG_055287.1_1-1152
blaADC-158	blaADC	extended-spectrum	class C beta-lactamase	ADC-158	BETA-LACTAM	CEPHALOSPORIN	WP_001211227.1	NG_055786.1	NG_055786.1_1-1152
blaADC-159	blaADC	extended-spectrum	class C beta-lactamase	ADC-159	BETA-LACTAM	CEPHALOSPORIN	WP_033851992.1	NG_055787.1	NG_055787.1_1-1152
blaADC-15	blaADC	extended-spectrum	class C beta-lactamase	ADC-15	BETA-LACTAM	CEPHALOSPORIN	WP_063857790.1	NG_048639.1	NG_048639.1_1-1152
blaADC-160	blaADC	extended-spectrum	class C beta-lactamase	ADC-160	BETA-LACTAM	CEPHALOSPORIN	WP_032037870.1	NG_055788.1	NG_055788.1_1-1152
blaADC-163	blaADC	extended-spectrum	class C beta-lactamase	ADC-163	BETA-LACTAM	CEPHALOSPORIN	WP_057093064.1	NG_056105.1	NG_056105.1_1-1152
